# Supplementary material for: Coopted temporal patterning governs cellular hierarchy, heterogeneity and metabolism in Drosophila neuroblast tumors
Source: eLife journal article supplement (doi:10.7554/elife.50375), 2019-09-30

*pox<sup>n</sup>>pros<sup>RNAi</sup>* 4d adult

Dapi Mira Imp-GFP

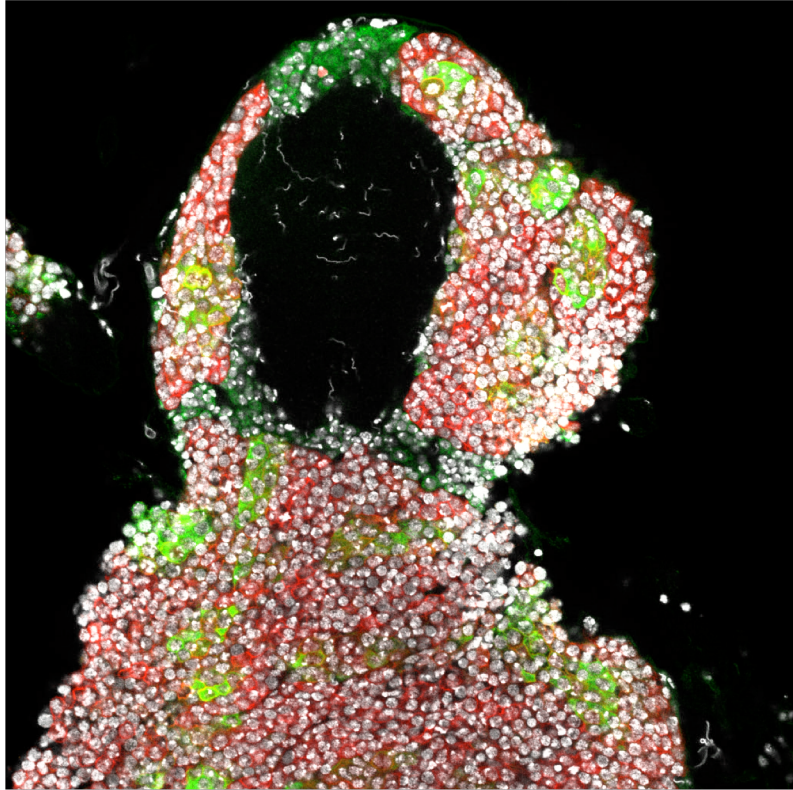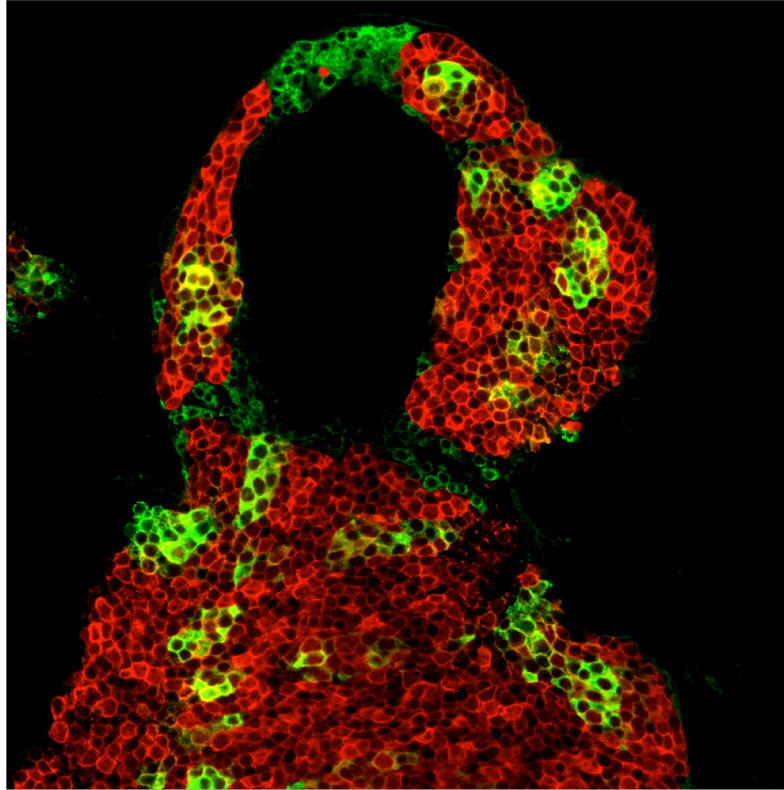

Segmented image Chinmo<sup>+</sup>Imp<sup>+</sup> tNBs

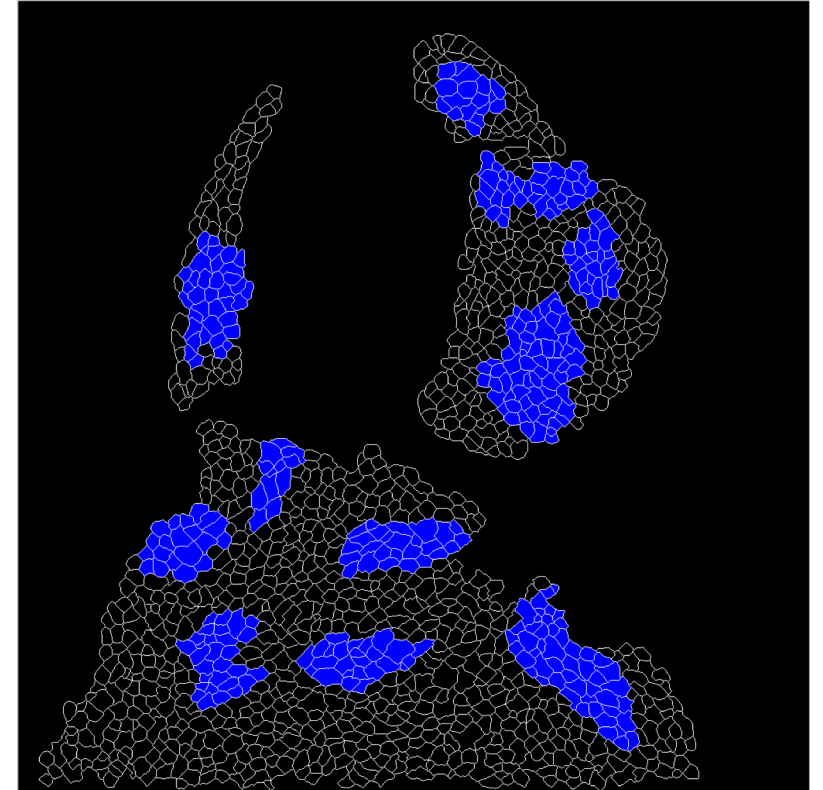

Supplement: supp [file elife_poa_e50375_Figure_8_figure_supplement_3.pdf › elife_poa_e50375_Figure_8_figure_supplement_3.pdf]
