# Supplementary material for: Coopted temporal patterning governs cellular hierarchy, heterogeneity and metabolism in Drosophila neuroblast tumors
Source: eLife journal article supplement (doi:10.7554/elife.50375), 2019-09-30

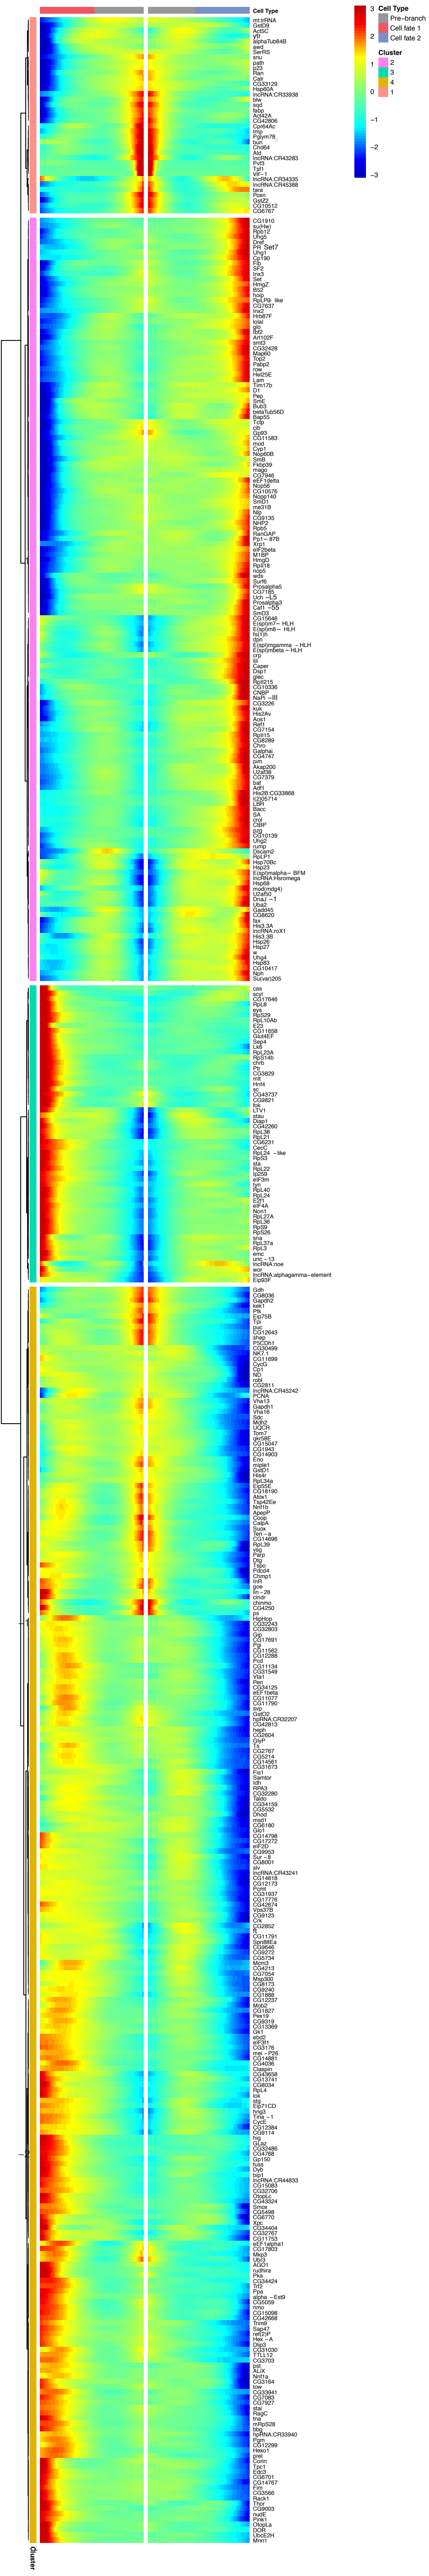

Supplement: supp [file elife_poa_e50375_Supplementary_file_3.pdf › elife_poa_e50375_Supplementary_file_3.pdf]
