# Supplementary material for: Coopted temporal patterning governs cellular hierarchy, heterogeneity and metabolism in Drosophila neuroblast tumors
Source: eLife. 2019 Sep 30;8:e50375. doi: 10.7554/eLife.50375 (PMC6791719; doi:10.7554/eLife.50375)
Supplement: Supplementary file 1. [file elife-50375-supp1.xlsx]

## Sheet: Feuil1
Cluster	FBgn	Gene symbol
1	FBgn0262972	CR43283
1	FBgn0036732	Oatp74D
1	FBgn0285926	Imp
1	FBgn0001092	Gapdh2
1	FBgn0266599	Hsc70-4
1	FBgn0010620	CG10939
1	FBgn0022355	Tsf1
1	FBgn0001098	Gdh
1	FBgn0265413	CG44325
1	FBgn0003360	sesB
1	FBgn0015519	nAChRalpha3
1	FBgn0063127	pncr002:3R
1	FBgn0000043	Act42A
1	FBgn0013686	mt:lrRNA
1	FBgn0265297	pAbp
1	FBgn0004432	Cyp1
1	FBgn0014869	Pglym78
1	FBgn0000064	Ald
1	FBgn0035512	Cpr64Ac
1	FBgn0035499	Chd64
1	FBgn0035423	eIF1
1	FBgn0043841	vir-1
1	FBgn0000579	Eno
1	FBgn0035921	CG13305
1	FBgn0036008	CG3408
1	FBgn0037607	CG8036
1	FBgn0261975	CG42806
1	FBgn0265487	mbl
1	FBgn0037913	fabp
1	FBgn0053129	CG33129
1	FBgn0005278	Sam-S
1	FBgn0011661	Moe
1	FBgn0266313	CR44978
1	FBgn0020255	Ran
1	FBgn0039830	ATPsynC
1	FBgn0263396	sqd
1	FBgn0013954	FK506-bp2
1	FBgn0032100	CG13108
1	FBgn0004362	HmgD
1	FBgn0028875	nAChRalpha5
1	FBgn0005585	Calr
1	FBgn0036007	path
1	FBgn0035710	SP1173
1	FBgn0000253	Cam
1	FBgn0039594	CG9990
1	FBgn0000042	Act5C
1	FBgn0038826	Syp
1	FBgn0039844	CG1607
1	FBgn0030159	CG9689
1	FBgn0001091	Gapdh1
1	FBgn0015399	kek1
1	FBgn0261801	CG42747
1	FBgn0021895	ytr
1	FBgn0031307	MFS3
1	FBgn0085407	Pvf3
1	FBgn0266777	CR45242
1	FBgn0040309	Jafrac1
1	FBgn0050197	CG30197
1	FBgn0034335	GstE1
1	FBgn0015778	rin
1	FBgn0022893	Df31
1	FBgn0040942	CG12643
1	FBgn0000150	awd
1	FBgn0003130	Poxn
1	FBgn0020238	14-3-3epsilon
1	FBgn0015245	Hsp60A
1	FBgn0003942	RpS27A
1	FBgn0039431	plum
1	FBgn0022959	yps
1	FBgn0032886	CG9328
1	FBgn0032946	nrv3
1	FBgn0000479	dnc
1	FBgn0027610	Dic1
1	FBgn0284248	Cyt-c-p
1	FBgn0036208	CG10361
1	FBgn0003884	alphaTub84B
1	FBgn0038020	GstD9
1	FBgn0015777	nrv2
1	FBgn0051660	smog
1	FBgn0010228	HmgZ
1	FBgn0013269	FK506-bp1
1	FBgn0063494	GstE6
1	FBgn0034259	P32
1	FBgn0260747	CG5010
1	FBgn0286222	Fum1
1	FBgn0011211	blw
1	FBgn0038149	GILT1
1	FBgn0267385	PyK
1	FBgn0262601	SmB
1	FBgn0036334	CG11267
1	FBgn0025678	CaBP1
1	FBgn0259682	Jabba
1	FBgn0004687	Mlc-c
1	FBgn0013675	mt:CoII
1	FBgn0052423	shep
1	FBgn0037728	CG16817
1	FBgn0002778	mnd
1	FBgn0030160	CG9691
1	FBgn0004363	porin
1	FBgn0035922	Pex7
1	FBgn0086355	Tpi
1	FBgn0010551	Phb2
1	FBgn0040070	Trx-2
1	FBgn0001149	GstD1
1	FBgn0000116	Argk
1	FBgn0037632	CCT7
1	FBgn0037057	CG10512
1	FBgn0002031	l(2)37Cc
1	FBgn0066084	RpL41
1	FBgn0033529	CG17765
1	FBgn0040529	COX7A
2	FBgn0052865	alphagamma-element:CR32865
2	FBgn0264490	Eip93F
2	FBgn0026197	noe
2	FBgn0010114	hig
2	FBgn0030616	RpL37a
2	FBgn0028473	Non1
2	FBgn0001942	eIF4A
2	FBgn0010113	hdc
2	FBgn0003941	RpL40
2	FBgn0040007	RpL38
2	FBgn0001983	wor
2	FBgn0041094	scyl
2	FBgn0002579	RpL36
2	FBgn0010408	RpS9
2	FBgn0037899	RpL24-like
2	FBgn0037686	RpL34b
2	FBgn0261597	RpS26
2	FBgn0259145	CG42260
2	FBgn0013272	Gp150
2	FBgn0003448	sna
2	FBgn0020910	RpL3
2	FBgn0264494	CG17646
2	FBgn0025366	Ip259
2	FBgn0011766	E2f1
2	FBgn0004878	cas
2	FBgn0003517	sta
2	FBgn0261599	RpS29
2	FBgn0000575	emc
2	FBgn0036786	skl
2	FBgn0263392	Tet
2	FBgn0284435	tyn
2	FBgn0263706	CG43658
2	FBgn0032987	RpL21
2	FBgn0285948
2	FBgn0002622	RpS3
2	FBgn0265512	mlt
2	FBgn0261560	Thor
2	FBgn0025726	unc-13
2	FBgn0034398	CG15098
2	FBgn0031632	CG15628
2	FBgn0039932	fuss
2	FBgn0015288	RpL22
2	FBgn0002626	RpL32
2	FBgn0033902	eIF3m
2	FBgn0032138	CG4364
2	FBgn0035397	CG11486
2	FBgn0261564	Reep1
2	FBgn0034083	lbk
2	FBgn0037636	CG9821
2	FBgn0036165	chrb
2	FBgn0031011	CG8034
2	FBgn0267336	Glut4EF
2	FBgn0003525	stg
2	FBgn0004198	ct
2	FBgn0264817	pre-lola-G
2	FBgn0029123	SoxN
2	FBgn0036213	RpL10Ab
2	FBgn0014026	RpL7A
2	FBgn0036196	CG11658
2	FBgn0262160	CG9932
2	FBgn0002609	E(spl)m3-HLH
2	FBgn0003326	sca
2	FBgn0261596	RpS24
2	FBgn0038720	CG6231
2	FBgn0015268	Nap1
2	FBgn0030364	CG15735
2	FBgn0031414	eys
2	FBgn0263773	fok
2	FBgn0032518	RpL24
2	FBgn0036258	eIF3l
2	FBgn0027525	LTV1
3	FBgn0001234	Hsromega
3	FBgn0030665	CG15646
3	FBgn0001230	Hsp68
3	FBgn0002633	E(spl)m7-HLH
3	FBgn0002735	E(spl)mgamma-HLH
3	FBgn0002732	E(spl)malpha-BFM
3	FBgn0031453	Bacc
3	FBgn0002733	E(spl)mbeta-HLH
3	FBgn0000591	E(spl)m8-HLH
3	FBgn0013279	Hsp70Bc
3	FBgn0001225	Hsp26
3	FBgn0031016	kek5
3	FBgn0041184	Socs36E
3	FBgn0039350	jigr1
3	FBgn0263106	DnaJ-1
3	FBgn0010109	dpn
3	FBgn0021776	mira
3	FBgn0001981	esg
