# Supplementary material for: Coopted temporal patterning governs cellular hierarchy, heterogeneity and metabolism in Drosophila neuroblast tumors
Source: eLife. 2019 Sep 30;8:e50375. doi: 10.7554/eLife.50375 (PMC6791719; doi:10.7554/eLife.50375)
Supplement: Supplementary file 2. [file elife-50375-supp2.xlsx]

## Sheet: Intersection with ScRNA-seq
	NA.	baseMean	log2FoldChange	lfcSE	stat	pvalue	padj
11430	Eip93F	14033.8	-2.66719	0.0823577	-32.3854	4.40425e-230	6.3703e-226
7264	E23	5282.71	3.44385	0.131517	26.1857	3.86893e-151	2.79801e-147
8614	CG40160	1492.84	-3.62416	0.143197	-25.3089	2.55097e-141	1.22991e-137
9703	CG42566	1240.2	5.30157	0.241922	21.9144	1.89529e-106	4.5689e-103
11624	CG44085	5531.88	-2.36593	0.115641	-20.4593	4.96797e-93	8.98209e-90
1992	sna	4006.39	2.44473	0.127478	19.1777	5.68027e-82	8.21594e-79
10567	CG4250	2072.22	3.64765	0.19348	18.8529	2.78256e-79	3.65881e-76
3806	Syp	116614	-2.11494	0.115705	-18.2787	1.22292e-74	1.47402e-71
16149	CG8620	751.818	-3.11542	0.17147	-18.1689	9.09283e-74	9.3942e-71
7780	Trim9	9191.88	1.9884	0.110924	17.9258	7.41477e-72	6.70296e-69
4884	ttk	2660.01	1.93891	0.110418	17.5598	5.00756e-69	4.02385e-66
15713	CG6024	6176.91	1.87514	0.110625	16.9504	1.91248e-64	1.3831e-61
15417	mnd	7553.46	1.57789	0.0939978	16.7864	3.0681e-63	2.11319e-60
1990	esg	4026.33	1.72097	0.104178	16.5195	2.65424e-61	1.66917e-58
7768	kek5	10570.2	-1.56107	0.0945984	-16.5021	3.54506e-61	2.13649e-58
9989	LanB1	5897.23	-2.41298	0.156534	-15.4151	1.29573e-53	6.04563e-51
9902	Thor	4104	2.29406	0.15204	15.0885	1.92636e-51	8.44329e-49
4981	Strica	1420.97	-2.64266	0.176728	-14.9533	1.48223e-50	6.2492e-48
7690	hig	76652.2	1.58099	0.105772	14.9471	1.62562e-50	6.53139e-48
13792	Imp	290575	1.4221	0.095359	14.9132	2.7066e-50	1.05806e-47
10332	Ptr	3740.27	1.82719	0.128278	14.2439	4.89017e-46	1.76829e-43
9646	elav	15331.2	1.20146	0.0853331	14.0796	5.06774e-45	1.7878e-42
10989	CG13894	1908.89	1.74827	0.124739	14.0154	1.25475e-44	4.32112e-42
13658	AsnS	2994.98	1.83513	0.132575	13.8422	1.41836e-43	4.55894e-41
6763	CG13741	2886.16	2.02398	0.150968	13.4066	5.52971e-41	1.66629e-38
1931	nAChRalpha5	25892.9	1.24428	0.0944045	13.1803	1.14004e-39	3.11124e-37
13800	RpL27A	104988	-1.28527	0.101399	-12.6754	8.0935e-37	2.12844e-34
5307	stau	73629.1	-0.981803	0.0778471	-12.6119	1.81482e-36	4.60518e-34
11913	mlt	3630.7	1.21207	0.0974634	12.4362	1.66256e-35	4.14607e-33
7804	ec	3157.12	-1.27834	0.10301	-12.4098	2.31118e-35	5.66591e-33
671	CG10508	11426.2	1.41572	0.114822	12.3297	6.26698e-35	1.51076e-32
14805	Tsf1	59008.6	-2.40574	0.19538	-12.3132	7.69505e-35	1.82461e-32
5484	sn	2544.36	1.39359	0.115133	12.1041	1.00425e-33	2.26961e-31
3747	mira	71741.1	-0.976664	0.0812381	-12.0223	2.71467e-33	5.69058e-31
553	CG4213	1888.65	-2.0707	0.172812	-11.9823	4.3974e-33	9.08629e-31
10118	Sec24CD	9599.19	-0.989272	0.0825697	-11.9811	4.46604e-33	9.09813e-31
14144	ImpL2	2597.44	1.3675	0.114358	11.9581	5.89173e-33	1.18358e-30
3189	Task6	5584.97	1.18062	0.0990284	11.9221	9.08083e-33	1.79925e-30
5945	CG5522	8034.39	-1.01375	0.0850558	-11.9186	9.46709e-33	1.85043e-30
6070	CG30089	6951.69	1.36083	0.114264	11.9096	1.05498e-32	2.03457e-30
15163	CG5535	8608.87	1.74425	0.146996	11.866	1.77728e-32	3.34774e-30
2672	CG9801	6531.92	1.11923	0.0943239	11.8658	1.78219e-32	3.34774e-30
1728	CG14937	1241.89	1.66918	0.14088	11.8482	2.19948e-32	4.07862e-30
5527	nAChRalpha3	8057.34	1.52279	0.130426	11.6755	1.70028e-31	3.07411e-29
231	Klp3A	14139.3	-0.927469	0.081273	-11.4118	3.65243e-30	6.44253e-28
15478	Gbs-70E	830.87	-2.07322	0.181925	-11.396	4.37822e-30	7.6297e-28
3467	Ubx	2154.48	1.9908	0.174924	11.3809	5.20564e-30	8.96362e-28
8425	tio	4455.17	1.19872	0.105499	11.3624	6.43383e-30	1.09481e-27
11225	fok	3984.08	1.24726	0.109825	11.3568	6.86347e-30	1.15434e-27
11306	CG43759	5005.71	-1.29928	0.114673	-11.3302	9.29652e-30	1.54557e-27
10154	CG43066	23968	0.882882	0.0782916	11.2768	1.70779e-29	2.80698e-27
8303	vir-1	19685.3	-1.72707	0.155644	-11.0963	1.3077e-28	2.05594e-26
15073	Mkp3	5480.91	1.00816	0.0915714	11.0095	3.4388e-28	5.29137e-26
16356	cactin	2868.15	-1.11455	0.101313	-11.0011	3.77518e-28	5.74782e-26
15489	D	610.66	3.34961	0.30481	10.9892	4.3085e-28	6.42456e-26
15489.1	D	610.66	3.34961	0.30481	10.9892	4.3085e-28	6.42456e-26
9022	CG34384	11201.1	0.941034	0.0863265	10.9009	1.14154e-27	1.68482e-25
5176	fest	1511.91	-1.58814	0.14572	-10.8986	1.17073e-27	1.71045e-25
642	Spc105R	22019.7	-0.862022	0.0794439	-10.8507	1.97917e-27	2.86268e-25
15487	fz	2523.36	1.34423	0.124438	10.8024	3.3537e-27	4.70951e-25
16227	CG13293	3380.4	1.10372	0.102276	10.7916	3.76992e-27	5.24309e-25
16709	MFS3	5624.13	1.25087	0.11631	10.7546	5.63719e-27	7.76536e-25
7151	Dhit	2678.89	1.69902	0.158087	10.7474	6.09577e-27	8.31785e-25
1582	Ip259	27119.4	-1.09774	0.102849	-10.6733	1.35693e-26	1.77438e-24
16080	CG12262	3968.06	1.03828	0.0977252	10.6245	2.2917e-26	2.93337e-24
7655	CG11155	12537.9	1.25466	0.118755	10.5651	4.32622e-26	5.44126e-24
4831	CG15556	2117.76	-2.16894	0.206399	-10.5085	7.89346e-26	9.84233e-24
7880	CHES-1-like	5134.38	1.40109	0.133491	10.4957	9.03617e-26	1.11709e-23
12446	nAChRalpha4	9649.25	-0.944944	0.09004	-10.4947	9.13533e-26	1.11977e-23
6950	CG2064	2015.11	-1.30553	0.12444	-10.4912	9.4811e-26	1.15239e-23
5237	edl	2190.46	-1.51151	0.145161	-10.4127	2.17083e-25	2.61657e-23
7404	dap	3405.82	1.32503	0.128287	10.3286	5.23227e-25	6.25451e-23
4741	CG31030	10732	1.31148	0.127636	10.2751	9.12516e-25	1.07306e-22
8678	Scp1	1918.99	2.23437	0.217578	10.2693	9.69188e-25	1.12147e-22
5177	CG11961	5830.33	-0.98242	0.0959494	-10.2389	1.32683e-24	1.51113e-22
661	kni	867.436	-1.98919	0.194363	-10.2344	1.3908e-24	1.5716e-22
10102	Sik3	3527.27	1.0538	0.10313	10.2181	1.64451e-24	1.84389e-22
31	CG17896	3811.12	1.00329	0.0982681	10.2097	1.79357e-24	1.99555e-22
3350	obe	11120	-0.895337	0.088074	-10.1657	2.81982e-24	3.11343e-22
14321	CG1806	577.999	1.88024	0.185093	10.1584	3.04169e-24	3.33296e-22
3064	Hsp70Bc	4796.85	-1.42441	0.14091	-10.1087	5.05752e-24	5.4591e-22
15055	Gbs-76A	4595.19	1.00148	0.0990896	10.1068	5.15458e-24	5.52265e-22
4431	plum	40279.3	0.983293	0.0973012	10.1057	5.21442e-24	5.54569e-22
13853	rho	5591.25	-1.08636	0.108268	-10.034	1.08036e-23	1.12105e-21
811	SPoCk	25033.7	0.819409	0.0819507	9.9988	1.54257e-23	1.57125e-21
10089	d	1041.05	-1.63944	0.164935	-9.93992	2.79054e-23	2.78361e-21
10089.1	d	1041.05	-1.63944	0.164935	-9.93992	2.79054e-23	2.78361e-21
8249	mIF3	1395.82	-1.27301	0.128272	-9.92425	3.2655e-23	3.21308e-21
16255	lin-28	1951.24	1.46886	0.148199	9.91139	3.71424e-23	3.62992e-21
10034	sdt	9189.24	0.945191	0.0955191	9.89531	4.36244e-23	4.23479e-21
15716	CG11658	2512.73	1.14786	0.116144	9.88304	4.93159e-23	4.75537e-21
10928	miple2	1949.88	1.38319	0.140206	9.86547	5.87574e-23	5.62826e-21
2984	Hsp70Aa	2590.16	-2.6447	0.268182	-9.86158	6.10806e-23	5.8123e-21
9049	sif	65758.5	1.01904	0.103498	9.84598	7.13416e-23	6.74434e-21
7078	Actbeta	5476.56	1.20006	0.122334	9.80971	1.02267e-22	9.54314e-21
3414	tara	5473.85	0.963934	0.098367	9.79936	1.133e-22	1.05049e-20
3943	CG7059	1435.73	2.08996	0.213366	9.79518	1.18082e-22	1.08786e-20
5893	eIF3b	57256.8	-0.742327	0.0759558	-9.77314	1.46823e-22	1.32728e-20
10214	Ect4	11581.6	-1.34956	0.138912	-9.71519	2.5976e-22	2.33365e-20
15982	CG6765	3472.11	1.15889	0.11931	9.71326	2.64721e-22	2.36353e-20
5796	eIF3k	15495.9	-0.93012	0.0964654	-9.64201	5.3137e-22	4.60224e-20
9516	zld	49180.9	-0.920621	0.0961126	-9.57857	9.83972e-22	8.32291e-20
12294	ana3	12528.5	-0.787418	0.0822991	-9.56776	1.09245e-21	9.18671e-20
15157	Eip75B	9527.2	0.890668	0.0935315	9.52265	1.68823e-21	1.39534e-19
10197	Mdh2	6800.29	1.09783	0.115303	9.52128	1.71062e-21	1.40582e-19
1573	lft	1301.53	-2.11884	0.222943	-9.50394	2.02086e-21	1.6514e-19
8998	CG34347	10573.2	1.19542	0.125857	9.49821	2.13534e-21	1.73514e-19
10935	pyx	2781.42	0.985581	0.103879	9.48774	2.36092e-21	1.90773e-19
3139	Dic1	2342.89	1.081	0.113999	9.48251	2.48244e-21	1.99477e-19
5630	fend	5621.91	0.866967	0.0915908	9.46566	2.91721e-21	2.33119e-19
15067	fz2	7886.95	1.04538	0.1107	9.44328	3.61274e-21	2.87114e-19
2896	RpL3	258312	-0.745388	0.0790573	-9.42845	4.16182e-21	3.27156e-19
14324	fw	4084.02	1.86616	0.198104	9.42008	4.50732e-21	3.50505e-19
2596	Mcm2	13231.5	-0.782968	0.0833306	-9.39593	5.67172e-21	4.3636e-19
14390	CG4404	1754.83	1.14935	0.123775	9.28581	1.60482e-20	1.2027e-18
4224	asp	19391.2	-0.723804	0.0784932	-9.22123	2.93723e-20	2.16756e-18
830	CG12768	2111.68	1.23499	0.135599	9.10766	8.41777e-20	6.14922e-18
7135	Gdh	21551.3	0.781404	0.0858357	9.10348	8.74802e-20	6.35836e-18
15653	eIF3l	42740.8	-0.943949	0.10387	-9.08779	1.01077e-19	7.2735e-18
414	CG4096	2004.5	1.49825	0.165325	9.06243	1.27575e-19	9.13484e-18
8347	CG17803	4734.83	0.930861	0.103004	9.03717	1.60782e-19	1.1394e-17
3358	pxb	4427.64	0.867837	0.0962873	9.01299	2.00506e-19	1.40103e-17
9460	laccase2	1529.91	-1.32408	0.148076	-8.94195	3.82367e-19	2.6462e-17
1221	Spn27A	862.616	1.49439	0.167146	8.94061	3.87035e-19	2.66575e-17
5567	Sptr	895.799	1.62414	0.181994	8.92413	4.4922e-19	3.07939e-17
1499	CG4364	43815.3	-1.16665	0.130925	-8.91079	5.06702e-19	3.45705e-17
5334	eIF3c	72251.5	-0.817907	0.0919131	-8.8987	5.65027e-19	3.81957e-17
4344	bam	3087.14	0.942428	0.106028	8.88846	6.19594e-19	4.16828e-17
13922	CG13928	18821.3	0.741364	0.0834753	8.88123	6.6123e-19	4.42779e-17
5489	UbcE2H	5970.39	0.846766	0.0954013	8.87584	6.94085e-19	4.62638e-17
15372	Pka-C3	465.094	2.4337	0.274571	8.86365	7.74392e-19	5.11452e-17
6513	shn	9422.11	0.794252	0.0899092	8.83394	1.01056e-18	6.61393e-17
8397	Gapdh1	20770.2	0.998405	0.113231	8.81738	1.17165e-18	7.63367e-17
7396	CG11883	4163.54	1.02924	0.116832	8.80965	1.25542e-18	8.14277e-17
5449	CBP	8242.02	1.0628	0.120676	8.80703	1.28505e-18	8.27632e-17
9841	scra	26676.6	-0.669468	0.0763814	-8.7648	1.87102e-18	1.17153e-16
7043	onecut	24747.6	0.729567	0.083536	8.73356	2.4677e-18	1.53188e-16
15038	wnd	2232.32	1.20911	0.138648	8.72071	2.76468e-18	1.7089e-16
1329	CG7466	12772.4	-0.766718	0.0880907	-8.70374	3.21133e-18	1.96816e-16
6680	PCB	7846.25	0.998851	0.11541	8.6548	4.93766e-18	2.98821e-16
10049	kdn	8185.5	1.3476	0.156174	8.62886	6.19676e-18	3.68848e-16
13841	l(3)02640	5209.64	-0.836761	0.0976686	-8.56735	1.05894e-17	6.27725e-16
10461	DnaJ-1	12173.2	-1.27907	0.149735	-8.54227	1.31608e-17	7.76973e-16
10985	hng3	1413.03	-1.0925	0.128574	-8.49701	1.94532e-17	1.13456e-15
2632	CG8036	29895.1	0.796453	0.0937756	8.49318	2.01051e-17	1.16787e-15
2121	CLIP-190	13878.4	-0.740806	0.0873038	-8.48538	2.15023e-17	1.23908e-15
3645	Mekk1	4552.48	0.786339	0.0929367	8.46102	2.65045e-17	1.51526e-15
14119	Fit1	6739.79	-0.742619	0.0885473	-8.38669	5.00032e-17	2.82518e-15
16566	CG31690	2270	1.16609	0.139622	8.35179	6.72339e-17	3.75471e-15
9470	crb	1135.08	1.3745	0.164822	8.33928	7.47442e-17	4.15808e-15
6233	eIF3m	39466.8	-0.812196	0.0980792	-8.28102	1.22121e-16	6.69074e-15
2789	CG8526	1014.48	-1.50296	0.181616	-8.27546	1.27959e-16	6.98413e-15
5681	CG12643	6863.87	1.0249	0.12519	8.18676	2.68345e-16	1.42697e-14
4380	LpR1	7848.87	0.822054	0.100901	8.14714	3.72619e-16	1.96699e-14
15880	RpS9	131421	-0.701457	0.0861821	-8.13924	3.97751e-16	2.09203e-14
15195	U4-U6-60K	5581.33	-0.718694	0.0885114	-8.11979	4.67009e-16	2.43856e-14
13939	CG1927	1307.19	1.26208	0.155705	8.10559	5.24882e-16	2.7309e-14
9990	CG42747	2031.58	1.80723	0.22387	8.07264	6.8792e-16	3.56633e-14
6744	Cyp4p2	1307.97	1.43488	0.178055	8.05863	7.71556e-16	3.98564e-14
6903	mus205	14382.7	-0.740033	0.0919113	-8.0516	8.17171e-16	4.19133e-14
8674	RpL5	176086	-0.613091	0.0761644	-8.04957	8.30841e-16	4.23144e-14
8677	Parp	14428.2	0.775961	0.0965078	8.0404	8.95439e-16	4.54443e-14
8282	TM4SF	3941.11	1.95858	0.244412	8.01345	1.11532e-15	5.60141e-14
447	CG3726	925.414	1.34992	0.168476	8.01253	1.12371e-15	5.62399e-14
12528	Kr-h1	11474.9	-1.01002	0.126242	-8.00066	1.23749e-15	6.17211e-14
10913	Pdk1	16221.7	0.878241	0.110097	7.977	1.49935e-15	7.40156e-14
5585	Lim1	1901.85	1.2765	0.160137	7.97131	1.57006e-15	7.72428e-14
1555	CG31875	355.604	2.52194	0.316408	7.97052	1.58003e-15	7.74696e-14
8351	cnn	13212.3	-0.658595	0.0830045	-7.93445	2.11434e-15	1.02969e-13
6660	egr	3625.81	0.937807	0.118384	7.92174	2.34201e-15	1.13674e-13
3295	CG6752	4718.92	-0.722937	0.0915438	-7.89717	2.853e-15	1.37096e-13
14911	CG14215	19183.9	-0.678603	0.0860959	-7.88195	3.22323e-15	1.53864e-13
11519	RhoGEF3	32732.2	-0.683213	0.0866899	-7.88112	3.24467e-15	1.54378e-13
14832	Ing3	3397.31	-0.781735	0.0992653	-7.87521	3.40163e-15	1.61315e-13
5685	CG15309	2227.26	1.17556	0.14932	7.87281	3.46769e-15	1.63911e-13
5368	Sema1b	11555.1	-0.732671	0.0934294	-7.84197	4.43517e-15	2.07606e-13
16054	CG32365	286.537	2.58636	0.330026	7.83686	4.61955e-15	2.15539e-13
6764	CG8080	1709.92	0.973367	0.124421	7.82315	5.15191e-15	2.39605e-13
9469	Ir40a	535.528	-2.49737	0.319772	-7.80985	5.72577e-15	2.6375e-13
7767	stan	56284.2	0.595829	0.0763485	7.80408	5.99387e-15	2.75223e-13
1402	CG17834	284.297	2.57493	0.330021	7.80234	6.07685e-15	2.7815e-13
7265	Fur1	5067.49	0.810573	0.104086	7.78757	6.83104e-15	3.11685e-13
9688	CG5004	18039.6	-0.796684	0.102498	-7.77268	7.68441e-15	3.4952e-13
9949	CG42724	12243.6	-0.633114	0.0817306	-7.74635	9.45697e-15	4.26123e-13
5737	CG17999	256.079	-2.58685	0.333961	-7.74595	9.48664e-15	4.26133e-13
16193	CG13300	768.81	1.65619	0.213946	7.74118	9.85012e-15	4.4109e-13
9406	bun	33920.2	0.708475	0.0916087	7.7337	1.04463e-14	4.66344e-13
10423	CG43324	2489.17	1.01815	0.131917	7.71813	1.18048e-14	5.23755e-13
15285	spd-2	15297.6	-0.638222	0.0828229	-7.70587	1.29956e-14	5.73074e-13
10650	Ice1	6846.19	-0.708351	0.0921255	-7.68898	1.48317e-14	6.52053e-13
11937	Cdc5	11345.7	-0.721837	0.0940138	-7.67799	1.61604e-14	7.08315e-13
4194	Nab2	7453.46	-0.676083	0.0883201	-7.65492	1.93438e-14	8.45284e-13
14240	sesB	64016.2	0.961485	0.125842	7.64041	2.16527e-14	9.43329e-13
2973	CG31368	16314.3	-0.648252	0.084864	-7.63872	2.19384e-14	9.52905e-13
16061	nmo	7780.02	0.727005	0.0958302	7.58638	3.28964e-14	1.42034e-12
2728	RpL34b	53235.1	-0.649128	0.0856817	-7.57604	3.5627e-14	1.53366e-12
14233	CG1582	9669.29	-0.74501	0.0986052	-7.55548	4.17316e-14	1.79112e-12
2835	CG12592	8881.27	-0.763118	0.10117	-7.54293	4.5952e-14	1.96642e-12
4582	CG9990	9362.37	-1.01704	0.134875	-7.54061	4.67783e-14	1.99588e-12
9664	Antp	24992.1	0.629146	0.0834513	7.53908	4.73299e-14	2.01347e-12
14156	Chd64	13080.5	0.865877	0.11493	7.53396	4.92251e-14	2.08795e-12
7656	jim	30241.9	0.614515	0.0818166	7.51088	5.87293e-14	2.4838e-12
1021	eIF3a	48531.8	-0.564828	0.0754433	-7.48679	7.05786e-14	2.96759e-12
9304	CG41520	1079.14	-1.69809	0.227167	-7.47507	7.71654e-14	3.23513e-12
1119	Gpdh	5019.06	1.11941	0.149985	7.46348	8.42679e-14	3.48243e-12
5678	l(1)G0289	6579.3	0.808894	0.108463	7.45777	8.79976e-14	3.62621e-12
13726	Ge-1	14785	-0.634825	0.0852061	-7.45047	9.30086e-14	3.8122e-12
11193	Lpt	6352.65	-0.653487	0.0877113	-7.45043	9.30384e-14	3.8122e-12
1330	Trf	1211.97	-1.00587	0.13514	-7.44312	9.83323e-14	4.00642e-12
12833	Cenp-C	11289.8	-0.606676	0.0815365	-7.44054	1.00273e-13	4.06259e-12
5615	c11.1	11250.4	-0.617195	0.0830343	-7.43302	1.06148e-13	4.27666e-12
2834	sle	49842.6	-0.773925	0.104251	-7.42367	1.13923e-13	4.57716e-12
5134	Toll-7	13514.9	0.923736	0.124638	7.41135	1.25022e-13	4.99536e-12
1473	Eaat1	38126.3	0.737299	0.0995404	7.40703	1.29155e-13	5.13215e-12
15882	path	18158.3	0.927786	0.125641	7.38445	1.53089e-13	6.03344e-12
5799	HmgZ	9572.41	1.39689	0.189266	7.38053	1.57666e-13	6.18017e-12
16437	RpL40	113745	-0.594099	0.0804935	-7.38071	1.57444e-13	6.18017e-12
9387	CG42258	4861.17	0.701295	0.0951462	7.37071	1.69724e-13	6.61693e-12
116	CG11403	4977.15	-0.67041	0.0910103	-7.36631	1.75418e-13	6.80228e-12
55	RpL22	129076	-0.626775	0.0852224	-7.35459	1.91519e-13	7.38703e-12
6624	CG18011	3029.65	-0.813436	0.110601	-7.35471	1.91348e-13	7.38703e-12
4632	stg	4318.77	-0.991336	0.134878	-7.3499	1.98362e-13	7.63059e-12
7570	Br140	10194.5	-0.668383	0.0910849	-7.33803	2.16767e-13	8.27261e-12
1139	eIF4A	176985	-0.610508	0.0833147	-7.32774	2.34074e-13	8.8862e-12
14236	sofe	2192.06	-0.804313	0.1101	-7.3053	2.76654e-13	1.0371e-11
5731	CG15651	1809.63	1.22351	0.167672	7.29707	2.94103e-13	1.0992e-11
7766	rdgB	12223.8	0.679195	0.093334	7.27704	3.41234e-13	1.2688e-11
2763	Scm	9472.65	-0.802616	0.110525	-7.26185	3.81821e-13	1.40884e-11
4233	Elal	852.458	-1.43235	0.197302	-7.25969	3.87964e-13	1.42787e-11
6224	Arc1	69866.2	-1.27861	0.176894	-7.22815	4.89626e-13	1.79745e-11
6906	phr	6018.56	0.746251	0.103299	7.2242	5.04066e-13	1.84577e-11
13532	rgr	3029.04	-0.932775	0.129232	-7.21785	5.28144e-13	1.9242e-11
9192	Myo31DF	5701.33	-0.991569	0.137535	-7.20955	5.61369e-13	2.035e-11
2329	neb	9793.92	-0.675157	0.0937033	-7.20527	5.7929e-13	2.08949e-11
7186	olf413	14637.8	0.614335	0.0854225	7.19173	6.39753e-13	2.29044e-11
5226	CG15098	16863.6	0.672856	0.0935997	7.18865	6.5433e-13	2.33109e-11
16440	ft	7802.2	-0.907003	0.126306	-7.18098	6.92152e-13	2.45977e-11
16695	robo2	5314.11	1.43877	0.200558	7.17382	7.29352e-13	2.58562e-11
1385	CG17292	1081.06	1.12178	0.156448	7.17031	7.48276e-13	2.64622e-11
9420	CG42299	135.931	-3.13902	0.437842	-7.1693	7.53818e-13	2.65932e-11
6339	bic	77192.3	-0.571614	0.079996	-7.14553	8.96461e-13	3.15485e-11
6293	CG6191	33216.6	-0.699437	0.0981162	-7.12866	1.01354e-12	3.5325e-11
16034	tut	349.672	2.24399	0.315062	7.12236	1.06096e-12	3.68004e-11
4643	CG11882	1061.05	-1.04203	0.14656	-7.10988	1.16142e-12	4.00925e-11
3877	CG3308	5262.97	-0.864128	0.121851	-7.09165	1.32518e-12	4.55282e-11
4667	Cap-D2	17947.8	-0.590393	0.0834337	-7.07619	1.48176e-12	5.03316e-11
4207	atl	7521.08	-0.645552	0.0912296	-7.07613	1.48235e-12	5.03316e-11
6227	CG8547	1904.47	-1.16297	0.164352	-7.07613	1.48239e-12	5.03316e-11
2706	Nmdmc	1356.18	1.0506	0.148504	7.07457	1.49909e-12	5.07793e-11
6377	sca	5030.03	-0.835073	0.118116	-7.06996	1.54983e-12	5.23757e-11
10876	CG3829	4741.17	0.911915	0.129362	7.0493	1.79816e-12	6.06259e-11
15875	CG6767	14230.2	0.762224	0.108266	7.04032	1.91801e-12	6.45166e-11
834	Chro	17175.1	-0.601473	0.0854434	-7.03944	1.93014e-12	6.47739e-11
14551	CG9164	1818.73	0.945415	0.134505	7.02884	2.0826e-12	6.95676e-11
8391	CG33978	2449.21	-1.18984	0.169296	-7.02815	2.09294e-12	6.97519e-11
10588	PIP5K59B	4439.26	0.921753	0.13118	7.0266	2.11622e-12	7.03656e-11
996	eIF3f1	24881.1	-0.586735	0.0837205	-7.00826	2.41292e-12	7.94999e-11
8626	RhoU	1983.95	0.814329	0.116939	6.96372	3.31403e-12	1.07238e-10
5697	stx	8956.52	0.72152	0.103631	6.9624	3.34535e-12	1.07766e-10
9854	hkb	9868.25	0.591575	0.0850003	6.95969	3.41026e-12	1.09613e-10
9183	snama	7744.62	-0.616812	0.0888703	-6.94058	3.9049e-12	1.24681e-10
10705	CG30183	7333.5	-0.623393	0.0899592	-6.92973	4.21641e-12	1.34036e-10
10185	CG43088	243.239	-1.81179	0.261518	-6.92795	4.26982e-12	1.35436e-10
13211	CG45781	1499.69	1.15365	0.167038	6.90654	4.96603e-12	1.56831e-10
7054	Hcf	31240.9	-0.568324	0.0823081	-6.90484	5.02605e-12	1.58381e-10
7316	pon	7458.83	0.602982	0.0875958	6.88368	5.83242e-12	1.82994e-10
5712	CG10543	11441	-0.554029	0.0806862	-6.86646	6.5814e-12	2.06046e-10
15346	CG13055	438.376	1.7507	0.255064	6.86379	6.70589e-12	2.0949e-10
1978	stc	19711.1	-0.864679	0.126067	-6.85887	6.94085e-12	2.16363e-10
4109	CG31140	7573.61	1.08621	0.158438	6.85578	7.09265e-12	2.20619e-10
9746	Atg1	14859.5	-0.726678	0.106381	-6.8309	8.43849e-12	2.608e-10
7799	pgant2	2731.5	0.947795	0.139366	6.80076	1.04068e-11	3.18907e-10
2934	RpL24-like	21085.9	-0.785253	0.115502	-6.7986	1.05637e-11	3.23031e-10
4370	Tsp96F	5618.48	-0.622424	0.0917746	-6.7821	1.18439e-11	3.60653e-10
3390	Hel89B	15172.4	-0.575563	0.0849286	-6.77702	1.22683e-11	3.72009e-10
15272	eIF3e	34227.3	-0.626859	0.0925603	-6.77244	1.26626e-11	3.82364e-10
9752	CG42588	8761.72	-0.906059	0.13434	-6.74452	1.53537e-11	4.59785e-10
12273	GlyS	7157.18	0.711311	0.105573	6.73764	1.60983e-11	4.81087e-10
2441	alpha-Est9	7766.34	0.864916	0.128419	6.7351	1.63815e-11	4.87536e-10
4754	CG7920	7344.15	0.593403	0.0881138	6.7345	1.6449e-11	4.88537e-10
11227	CG43693	2704.91	0.951434	0.141418	6.72781	1.72236e-11	5.09453e-10
5561	CG12112	659.828	1.11595	0.166043	6.72083	1.80693e-11	5.31595e-10
6260	CG6329	15135.4	1.02548	0.152584	6.72072	1.80825e-11	5.31595e-10
4469	CG6330	9581.78	0.615067	0.0915153	6.72092	1.80584e-11	5.31595e-10
1053	CG31918	3261.16	-0.927652	0.138167	-6.71401	1.89346e-11	5.55517e-10
3960	Nrx-1	23006.8	1.13447	0.169075	6.70985	1.94821e-11	5.70422e-10
5702	CG1628	704.175	1.7119	0.256097	6.68458	2.3159e-11	6.75346e-10
4356	jigr1	53372.9	-0.598862	0.0896251	-6.68186	2.35932e-11	6.86624e-10
8591	Slmap	11977.7	-0.597	0.089501	-6.67032	2.55254e-11	7.39878e-10
15071	CG10424	791.665	1.05402	0.158392	6.65446	2.84343e-11	8.17641e-10
13793	Rab1	15556.3	0.610929	0.0921935	6.62659	3.4352e-11	9.81951e-10
1083	Cap-D3	3497.05	-0.656828	0.0991709	-6.62319	3.51539e-11	1.00092e-09
15041	ash1	12891.1	-0.54492	0.0822856	-6.6223	3.53643e-11	1.00493e-09
14241	Ant2	3816.56	0.809201	0.122483	6.60662	3.93195e-11	1.10861e-09
15917	Hsp67Bc	360.84	1.69874	0.257242	6.60366	4.01136e-11	1.1288e-09
9692	CG42553	1299.04	-1.06502	0.161327	-6.60161	4.0673e-11	1.14232e-09
7073	ATPsynbeta	52838.6	0.697301	0.106012	6.57756	4.78235e-11	1.33279e-09
6970	CG1358	15169.6	0.580442	0.088376	6.56787	5.10399e-11	1.41425e-09
5464	Tom40	7660.37	0.733232	0.111645	6.56754	5.11525e-11	1.41466e-09
2376	CG9336	1520.5	-1.35862	0.207678	-6.54197	6.07126e-11	1.66948e-09
8653	CG17672	62.9624	-3.85373	0.589109	-6.54163	6.08517e-11	1.67013e-09
14722	baz	15651.2	-0.689642	0.105752	-6.5213	6.96998e-11	1.90935e-09
4521	mrt	3987.9	0.772902	0.118645	6.51441	7.29747e-11	1.98777e-09
5524	CG10555	15293.7	-0.523163	0.0804078	-6.50637	7.69902e-11	2.09321e-09
15916	Hsp26	11737.3	-1.24775	0.191863	-6.50334	7.85584e-11	2.13184e-09
944	PEK	9051.64	-0.553379	0.0852574	-6.49069	8.54451e-11	2.31438e-09
4353	msi	70560	0.533528	0.0826562	6.45479	1.0837e-10	2.91894e-09
1067	vri	2728.1	1.23528	0.191718	6.44324	1.16951e-10	3.12677e-09
9289	dgo	405.45	-1.61105	0.250373	-6.43459	1.23811e-10	3.29798e-09
2210	msl-1	10477.4	-0.552842	0.0860053	-6.428	1.29297e-10	3.43779e-09
6193	Su(var)2-HP2	34341.9	-0.583124	0.090826	-6.42023	1.36066e-10	3.59435e-09
14942	CG14234	7998.79	0.916965	0.143065	6.40944	1.46059e-10	3.82025e-09
4873	RpL6	131649	-0.470686	0.0735824	-6.39671	1.58756e-10	4.12994e-09
12583	Hsc70-4	294232	0.599293	0.0937022	6.39572	1.5979e-10	4.14937e-09
6957	CanB2	2952.17	0.652207	0.102012	6.39341	1.62229e-10	4.20515e-09
14613	Gapdh2	28511.3	0.862291	0.134919	6.39117	1.6462e-10	4.25952e-09
12521	CG45071	1196.21	0.870451	0.136227	6.38971	1.66203e-10	4.29278e-09
14956	COX6B	7994.44	0.639675	0.10031	6.37699	1.80604e-10	4.63989e-09
2097	glu	20734.2	-0.56853	0.0893271	-6.36458	1.95819e-10	5.00411e-09
152	CG3587	526.012	1.29241	0.203461	6.35212	2.12373e-10	5.41757e-09
13764	Letm1	8636.17	-0.585491	0.0922328	-6.34796	2.18184e-10	5.55602e-09
14561	RpL37a	120384	-0.543675	0.0856525	-6.34745	2.18907e-10	5.56461e-09
14561.1	RpL37a	120384	-0.543675	0.0856525	-6.34745	2.18907e-10	5.56461e-09
7281	Nup98-96	25812.8	-0.505893	0.079714	-6.34635	2.20486e-10	5.59493e-09
15302	CG33158	9387.32	-0.628367	0.0991856	-6.33526	2.36935e-10	5.98086e-09
4778	spdo	13651.2	0.57134	0.090202	6.334	2.38889e-10	6.01967e-09
10906	Kr	392.148	-1.54626	0.244338	-6.32838	2.47752e-10	6.22132e-09
3674	CG6040	1332.2	-0.894674	0.141383	-6.32803	2.48306e-10	6.22444e-09
7261	Tm1	10836.1	0.766704	0.121353	6.31794	2.65066e-10	6.61021e-09
7907	shep	32596	0.839564	0.133008	6.31212	2.75243e-10	6.82866e-09
4982	Act42A	23703.6	0.803624	0.12741	6.30741	2.83747e-10	7.02759e-09
2053	CG31817	1312.22	-0.83648	0.132638	-6.30647	2.85472e-10	7.05823e-09
4348	Cad96Ca	5356.85	0.790863	0.125589	6.29721	3.0305e-10	7.44196e-09
3423	Sulf1	5054.26	-0.60107	0.095456	-6.29683	3.03801e-10	7.44776e-09
4410	Dak1	5673.83	0.700649	0.111331	6.29337	3.10653e-10	7.60285e-09
4055	RpS3	188604	-0.530188	0.0844062	-6.28138	3.35576e-10	8.17133e-09
1339	pes	1031.51	-0.95973	0.152886	-6.27744	3.44197e-10	8.36717e-09
14914	Ubqn	13351.3	-0.564613	0.089998	-6.27362	3.52757e-10	8.56087e-09
11506	mgr	3611.49	0.670752	0.107088	6.26357	3.76256e-10	9.08541e-09
8297	Pld	1496.65	0.939829	0.150243	6.25538	3.96558e-10	9.5422e-09
14628	sun	5096.89	0.676697	0.108183	6.25514	3.97152e-10	9.5422e-09
14548	dah	2283.85	-0.709747	0.113533	-6.25144	4.0668e-10	9.75492e-09
4011	wfs1	2631.57	-0.717946	0.114878	-6.24966	4.11345e-10	9.85048e-09
9922	RpS6	121588	-0.504843	0.0808295	-6.24578	4.21699e-10	1.00651e-08
250	w	12603.9	1.03491	0.166536	6.21432	5.15489e-10	1.22431e-08
9270	frtz	2419.81	-0.655894	0.105727	-6.20363	5.51767e-10	1.30832e-08
9052	CG34423	285.896	-1.66199	0.268096	-6.19924	5.67366e-10	1.34311e-08
4421	Ald	29391.7	0.789996	0.12756	6.19313	5.89795e-10	1.38938e-08
9921	pdm3	3151.09	1.1324	0.183295	6.178	6.49187e-10	1.5268e-08
204	CG2865	2149.79	0.807038	0.130796	6.17022	6.81948e-10	1.60125e-08
9273	ncm	13456.5	-0.628401	0.10198	-6.162	7.1832e-10	1.67577e-08
3655	Rh2	133.546	-2.17152	0.352571	-6.15909	7.31627e-10	1.70407e-08
9039	CG34404	4221.74	0.609333	0.0989367	6.15882	7.32881e-10	1.70424e-08
498	Top3beta	9320.95	-0.521277	0.0846767	-6.15609	7.45631e-10	1.72963e-08
9468	Jabba	458.982	-1.62429	0.263856	-6.15597	7.46188e-10	1.72963e-08
10373	RpII140	30380.6	-0.675465	0.109862	-6.14832	7.8306e-10	1.80929e-08
14099	Fie	3893.51	0.905741	0.147399	6.14482	8.00546e-10	1.84675e-08
5328	POSH	3182.15	-0.640848	0.104388	-6.13907	8.30038e-10	1.90869e-08
3731	RhoGAP92B	4045.94	-0.626132	0.102088	-6.13324	8.61072e-10	1.97552e-08
11657	Piezo	8806.98	-0.707766	0.115551	-6.12514	9.06014e-10	2.07351e-08
15951	CG6511	3750.36	-0.599868	0.0980753	-6.1164	9.57147e-10	2.18362e-08
1305	CG7154	8543.14	-0.562835	0.0920574	-6.11396	9.71887e-10	2.21028e-08
13840	ND-ACP	5930.21	0.559476	0.0917778	6.09598	1.0877e-09	2.46204e-08
7129	Sam-S	40072	0.536557	0.0880149	6.09621	1.08613e-09	2.46204e-08
14645	eas	3721.75	0.629972	0.103607	6.0804	1.1988e-09	2.70507e-08
14549	HDAC6	4887.69	-0.757892	0.124711	-6.0772	1.22302e-09	2.75541e-08
11434	CG17646	1639.03	-0.862783	0.142043	-6.07411	1.24679e-09	2.80459e-08
4816	CG12071	983.521	1.00115	0.164935	6.06996	1.27943e-09	2.8691e-08
6028	krimp	3290.97	1.01533	0.167459	6.06317	1.33461e-09	2.98358e-08
1707	CG6230	6042.82	-0.545481	0.090049	-6.0576	1.38165e-09	3.08398e-08
10245	Tmhs	1132.48	-1.71798	0.283793	-6.05365	1.41599e-09	3.15576e-08
3172	rin	46284	0.555724	0.0918395	6.05103	1.43921e-09	3.20258e-08
751	P5CDh1	14247	0.502908	0.0831326	6.04947	1.45325e-09	3.22885e-08
515	drongo	6141.67	0.559688	0.0926602	6.04022	1.53907e-09	3.40905e-08
15848	RasGAP1	17288.3	-0.584427	0.0968673	-6.03328	1.60665e-09	3.53708e-08
10265	CG43163	46244.1	-0.491685	0.0815154	-6.0318	1.6214e-09	3.55871e-08
16053	bip1	1914.87	0.742574	0.12314	6.0303	1.63656e-09	3.58655e-08
3094	Hsp70Ba	6356.08	-2.68889	0.445956	-6.02951	1.64458e-09	3.59868e-08
15919	Klp67A	8796.49	-0.521633	0.086538	-6.02779	1.66214e-09	3.62725e-08
2788	CG8516	5108.79	-0.540139	0.0896124	-6.0275	1.66516e-09	3.62725e-08
166	eIF2Bepsilon	6933.91	-0.550048	0.0912554	-6.02756	1.66451e-09	3.62725e-08
12536	Nsf2	3907.42	-0.579242	0.0962099	-6.0206	1.73767e-09	3.77383e-08
5409	RpL17	96459.5	-0.444179	0.0738561	-6.01411	1.80881e-09	3.92243e-08
4190	CG18528	829.007	-0.931625	0.155182	-6.00345	1.93167e-09	4.17633e-08
5979	Cdk4	933.102	1.14465	0.190896	5.9962	2.01991e-09	4.3541e-08
13760	Cyt-c-p	9999.75	0.776622	0.129577	5.99353	2.05336e-09	4.41962e-08
6053	Shark	2148.47	-0.734185	0.122784	-5.97947	2.23867e-09	4.79705e-08
1717	Dlg5	9731.51	-0.497628	0.0832577	-5.97696	2.27335e-09	4.86417e-08
2402	CG8677	17715.5	-0.547086	0.091577	-5.97405	2.31428e-09	4.94443e-08
2241	CG31800	936.363	1.10335	0.18486	5.96856	2.39351e-09	5.10615e-08
14653	U2af50	13145.4	-0.566022	0.0948863	-5.96526	2.4424e-09	5.20277e-08
10578	blw	42344	0.745627	0.125152	5.95779	2.55665e-09	5.4222e-08
6587	CG30020	12640.5	-0.485867	0.0816074	-5.95372	2.62122e-09	5.52179e-08
7686	14-3-3zeta	72105.8	0.508748	0.0858677	5.92479	3.12703e-09	6.54549e-08
5857	MED16	2258.91	-0.657605	0.111032	-5.92267	3.16748e-09	6.62058e-08
10927	miple1	12564.1	0.995968	0.168177	5.92216	3.17749e-09	6.63193e-08
4002	CG31139	206.066	-1.65238	0.279256	-5.91708	3.27712e-09	6.82019e-08
9320	gfzf	9001.92	-0.566511	0.095867	-5.90934	3.43473e-09	7.11748e-08
3707	Nup58	2084.78	-0.648625	0.109832	-5.90562	3.51328e-09	7.25945e-08
7666	polo	25260.7	-0.657539	0.11138	-5.90354	3.55778e-09	7.32001e-08
4171	BRWD3	20547.3	-0.548297	0.0930476	-5.89265	3.80043e-09	7.80816e-08
9800	Hr39	3071.27	0.794956	0.135087	5.88478	3.98591e-09	8.16604e-08
10792	enok	13852.2	-0.542149	0.0922205	-5.87884	4.13164e-09	8.45262e-08
14237	feo	13019.9	-0.514727	0.0875836	-5.87697	4.17834e-09	8.53608e-08
10689	apt	40584	0.574891	0.0979529	5.86906	4.38282e-09	8.93345e-08
9234	Ino80	12362.7	-0.521467	0.0889289	-5.86387	4.52206e-09	9.1993e-08
10599	robo1	5843.1	0.654595	0.111726	5.85891	4.65916e-09	9.45162e-08
7266	arm	18414.9	0.627459	0.107103	5.85849	4.67088e-09	9.46213e-08
7361	Mtl	6405.83	-0.635326	0.108472	-5.85704	4.71179e-09	9.53166e-08
5272	Eip55E	3113.24	0.845612	0.144479	5.85284	4.83254e-09	9.76228e-08
7296	CG12605	3788.56	0.831995	0.142304	5.84659	5.01753e-09	1.01218e-07
12292	CG44838	6181.56	0.526129	0.0901063	5.83899	5.25198e-09	1.058e-07
6595	LTV1	19307.1	-0.734888	0.126041	-5.83056	5.52427e-09	1.10976e-07
7285	CG10217	2622.91	-0.627283	0.107658	-5.82662	5.65599e-09	1.13308e-07
5696	Rph	2006.3	-1.73089	0.298013	-5.80811	6.3181e-09	1.25702e-07
2805	CG12948	896.206	1.05659	0.182163	5.80026	6.62127e-09	1.31372e-07
9819	bou	1134.34	0.969467	0.167198	5.79831	6.69872e-09	1.32726e-07
4714	ncd	13386.1	-0.504062	0.0869369	-5.79803	6.70988e-09	1.32766e-07
14294	Ptp10D	5894.92	0.724168	0.124927	5.79672	6.76259e-09	1.33444e-07
6976	Orc1	4420.23	-0.595737	0.102784	-5.79602	6.79088e-09	1.33819e-07
15617	sti	34602.7	-0.510151	0.0881892	-5.78473	7.26281e-09	1.4273e-07
7160	CG6686	17217.8	-0.68097	0.117791	-5.78118	7.41782e-09	1.45579e-07
4046	CG4467	10986.5	0.65044	0.112555	5.77884	7.52157e-09	1.47415e-07
14525	Lsd-2	2097.1	0.742689	0.128576	5.77628	7.63719e-09	1.49478e-07
4718	ATPsyngamma	11573.7	0.653197	0.113118	5.7745	7.71838e-09	1.50863e-07
12834	Sf3a1	6298.95	-0.511399	0.0886252	-5.77035	7.91052e-09	1.5441e-07
7514	yip2	2526.94	0.793232	0.137534	5.76753	8.04415e-09	1.56596e-07
4942	RpL21	104109	-0.438179	0.0759845	-5.76669	8.08431e-09	1.57166e-07
16393	smog	60857.4	0.493206	0.0858291	5.74638	9.1176e-09	1.76779e-07
258	CG2658	6299.59	-0.536094	0.0936089	-5.72695	1.0225e-08	1.97455e-07
15543	cmb	6306.21	-0.506043	0.0885399	-5.71542	1.09431e-08	2.1104e-07
5644	l(1)G0320	7741.82	-0.543903	0.09531	-5.70668	1.15204e-08	2.2129e-07
7910	cana	10850.3	-0.670295	0.117505	-5.70439	1.16761e-08	2.23686e-07
15258	Nrt	22842.9	0.440192	0.0772209	5.70043	1.19504e-08	2.28638e-07
10803	nvy	4156.49	0.538172	0.0944981	5.69505	1.23333e-08	2.35652e-07
14994	Prp3	4959.32	-0.640143	0.112564	-5.68691	1.29357e-08	2.46187e-07
10119	kibra	2811.82	-0.663936	0.116815	-5.68366	1.31846e-08	2.50593e-07
4069	ATPsynCF6	6256.88	0.545086	0.0959231	5.68253	1.32719e-08	2.51922e-07
8371	Pglym78	8134.4	0.734935	0.129542	5.67334	1.4004e-08	2.64431e-07
15613	Tsf2	3920.62	-0.64393	0.113521	-5.67235	1.40856e-08	2.65624e-07
5736	CG9993	782.136	-1.47164	0.259484	-5.67143	1.41612e-08	2.66702e-07
5638	Hex-A	7056.42	0.559125	0.0989053	5.65313	1.57553e-08	2.94424e-07
11224	CG43689	839.475	0.90008	0.159335	5.64899	1.61394e-08	3.00051e-07
9608	CG42492	7754.75	0.955356	0.169127	5.64876	1.61614e-08	3.00074e-07
15309	TyrRS	7501.53	-0.633971	0.112304	-5.64513	1.65055e-08	3.06071e-07
9265	Plp	31362	-0.459158	0.0815544	-5.63008	1.80124e-08	3.33161e-07
2773	mura	19554.7	0.446974	0.0794744	5.62413	1.86443e-08	3.42658e-07
2497	Ufl1	4778.84	-0.552018	0.098197	-5.62153	1.89273e-08	3.47417e-07
5632	CG7766	12872.8	-0.530493	0.0943862	-5.62045	1.90463e-08	3.49158e-07
14167	DOR	2376.97	0.61125	0.108791	5.61857	1.92548e-08	3.52534e-07
14167.1	DOR	2376.97	0.61125	0.108791	5.61857	1.92548e-08	3.52534e-07
9719	Sec22	1966.37	-0.673461	0.119933	-5.61529	1.96231e-08	3.58369e-07
5529	Corp	2180.12	-1.11592	0.198853	-5.61177	2.00263e-08	3.65272e-07
135	sta	297106	-0.459925	0.0819788	-5.61029	2.01987e-08	3.6749e-07
16715	CG4887	9491.04	-0.476665	0.0850446	-5.60488	2.08395e-08	3.78672e-07
7735	Nelf-A	7735.64	-0.476487	0.0850714	-5.60102	2.13092e-08	3.8672e-07
8370	CG12877	3106.8	-0.557146	0.0995783	-5.59506	2.20547e-08	3.98749e-07
176	CG14812	2138.32	0.63256	0.113111	5.5924	2.23947e-08	4.03887e-07
10781	ytr	9609.33	-0.509025	0.0912122	-5.58067	2.39592e-08	4.30492e-07
5257	GstE8	578.34	1.52983	0.274182	5.57963	2.4103e-08	4.32538e-07
4920	CG31612	629.53	0.987208	0.17708	5.57492	2.47639e-08	4.42203e-07
7181	CG11710	2310.23	-0.617873	0.110907	-5.57107	2.5318e-08	4.51541e-07
4524	woc	22505.9	-0.444779	0.0798627	-5.5693	2.55762e-08	4.54464e-07
15935	teq	5376.44	-0.766393	0.137606	-5.56949	2.55488e-08	4.54464e-07
565	ND-15	2785.13	0.567645	0.102225	5.55292	2.80934e-08	4.96146e-07
5042	Tsp42Ee	22600.4	0.495746	0.0892949	5.55178	2.82769e-08	4.9817e-07
3336	Cp190	26934.1	-0.449271	0.0809608	-5.54924	2.86908e-08	5.04847e-07
4396	E(spl)malpha-BFM	147.267	-1.83455	0.330786	-5.54603	2.9223e-08	5.13586e-07
1569	Sps2	3756.68	0.626774	0.113066	5.54342	2.96614e-08	5.203e-07
2239	l(2)37Bb	1557.96	0.787397	0.142066	5.54248	2.98212e-08	5.21564e-07
4485	Men-b	12656.9	0.505584	0.0912493	5.54069	3.01278e-08	5.2629e-07
14581	CG9281	21739.8	0.540633	0.0976065	5.5389	3.04379e-08	5.31067e-07
3781	bon	19212.7	-0.472778	0.0853973	-5.53622	3.09071e-08	5.37954e-07
5680	Gip	1642.49	0.777743	0.140537	5.53409	3.1284e-08	5.4386e-07
5905	cnk	7460.65	-0.502479	0.0908177	-5.53283	3.15111e-08	5.46494e-07
14341	Hsc70-3	31214.8	-0.472776	0.0854692	-5.53154	3.17436e-08	5.4921e-07
4719	Wdr24	2345.24	-0.608776	0.110086	-5.52998	3.20259e-08	5.53431e-07
2136	mEFTs	4835.76	-0.712231	0.128802	-5.52966	3.20848e-08	5.53788e-07
14646	UQCR-14	5960.27	0.680408	0.123086	5.52792	3.24048e-08	5.58645e-07
2442	alpha-Est10	299.365	1.34851	0.24403	5.52599	3.27631e-08	5.63479e-07
14776	RhoGAPp190	21378.4	0.527186	0.0954298	5.52433	3.30738e-08	5.68146e-07
9904	CG42676	1951.57	-0.700795	0.126952	-5.52016	3.38694e-08	5.80435e-07
16315	Hlc	18001.1	-0.612779	0.111038	-5.51862	3.4168e-08	5.84858e-07
1255	Wee1	6798.42	-0.497848	0.0902968	-5.51346	3.51846e-08	6.01549e-07
14886	rictor	11490.2	-0.461892	0.0838491	-5.50861	3.61669e-08	6.16884e-07
6868	udd	2096.21	0.708837	0.128911	5.49866	3.82684e-08	6.5196e-07
8216	eys	8279.88	-0.652525	0.118713	-5.49665	3.87078e-08	6.5867e-07
8668	rl	19449.1	0.472884	0.0860415	5.496	3.88505e-08	6.60322e-07
6583	CG7222	4854.26	0.504499	0.0918008	5.49558	3.89428e-08	6.61114e-07
15202	CG7630	5779.72	0.626383	0.114157	5.48703	4.08744e-08	6.90663e-07
10882	CG2765	7913.84	-0.531074	0.0968158	-5.4854	4.12536e-08	6.96257e-07
11780	CG44243	4555.53	0.557416	0.101723	5.47976	4.25894e-08	7.16295e-07
14574	CG8097	2567.61	-0.621397	0.113427	-5.4784	4.29179e-08	7.20145e-07
14909	Rcd-1	9483.53	0.466397	0.0852085	5.4736	4.40996e-08	7.37406e-07
14585	CG15646	17882.8	-0.654754	0.119659	-5.47185	4.45365e-08	7.43852e-07
6464	EndoG	3497.29	-0.580685	0.106142	-5.47083	4.4793e-08	7.46412e-07
6609	Galphao	9864.45	0.820378	0.150034	5.46794	4.55293e-08	7.57809e-07
1242	Coprox	1422.92	-0.679982	0.124811	-5.44807	5.09183e-08	8.45559e-07
8438	nAChRalpha6	3892.77	0.830833	0.152555	5.44611	5.1482e-08	8.52962e-07
4548	mino	9966.5	0.449259	0.0826967	5.43262	5.55335e-08	9.19035e-07
7708	cher	13231.2	-0.559067	0.103013	-5.42713	5.72667e-08	9.46636e-07
4550	Gp93	23672.4	-0.472782	0.0871635	-5.42408	5.82524e-08	9.6183e-07
3084	mus308	10654.3	-0.444763	0.0820047	-5.42362	5.84024e-08	9.63206e-07
7287	scrt	12715.5	0.629341	0.116142	5.41874	6.00211e-08	9.87651e-07
2366	dia	9636.92	-0.509544	0.0940324	-5.41882	5.99953e-08	9.87651e-07
7158	Zasp66	1094.65	0.75165	0.138871	5.41259	6.21199e-08	1.02102e-06
448	CG12728	3999.07	-0.596993	0.110379	-5.40858	6.35275e-08	1.04298e-06
7702	CG32576	6850.67	0.602872	0.111821	5.39138	6.99188e-08	1.14531e-06
5011	Rab2	6312.1	0.57667	0.107008	5.38905	7.08328e-08	1.15897e-06
1753	CG6770	12780.2	0.867726	0.161077	5.38704	7.16273e-08	1.17064e-06
9645	gwl	5171.01	-0.500102	0.092871	-5.38491	7.24815e-08	1.18117e-06
722	barc	6828.94	-0.516376	0.0958983	-5.38462	7.2598e-08	1.18117e-06
3243	Afti	4740.18	0.534614	0.0993331	5.38203	7.36502e-08	1.19694e-06
15206	UQCR-Q	4798.58	0.649237	0.120673	5.38014	7.44285e-08	1.20823e-06
975	corto	19269.3	0.451116	0.0838742	5.37848	7.51156e-08	1.21626e-06
15845	Taf2	5932.03	-0.470214	0.0874383	-5.37767	7.54576e-08	1.21946e-06
3043	GstD9	3245.21	-1.4102	0.262627	-5.3696	7.89093e-08	1.2724e-06
362	rb	8214.84	-0.458414	0.085406	-5.36747	7.98478e-08	1.28589e-06
2729	FER	5041.59	0.65099	0.121344	5.36483	8.10274e-08	1.3022e-06
2662	CG8369	9670.13	-0.78394	0.146151	-5.36392	8.14365e-08	1.30732e-06
15201	tap	19483.2	-0.643436	0.119983	-5.36272	8.19766e-08	1.31453e-06
4256	lili	5756.71	-0.488197	0.0910778	-5.36022	8.31202e-08	1.32992e-06
9195	Tpi	8363.83	0.576134	0.107541	5.35734	8.44552e-08	1.34979e-06
403	l(1)G0045	4893.31	-0.510191	0.0952688	-5.35528	8.54231e-08	1.36375e-06
10639	CG3788	1980.3	-0.789211	0.147541	-5.34909	8.83969e-08	1.40967e-06
8239	CG12179	5304.84	-0.592052	0.110711	-5.34772	8.90668e-08	1.41879e-06
14780	Ankle2	17505.7	-0.500048	0.0935911	-5.3429	9.14719e-08	1.4539e-06
12670	Bruce	107649	-0.3984	0.0746673	-5.33567	9.51934e-08	1.50973e-06
9080	Pdxk	1666.36	0.781993	0.14659	5.33456	9.57769e-08	1.51732e-06
5398	CG14441	13892.8	0.57448	0.107776	5.33029	9.80546e-08	1.55171e-06
15516	CG8833	2381.52	-0.574933	0.107867	-5.33002	9.8201e-08	1.55233e-06
15228	CG6512	10995.8	-0.442701	0.0831622	-5.32335	1.01874e-07	1.60512e-06
9504	CG42389	16618.2	0.543658	0.102153	5.32198	1.02644e-07	1.6155e-06
5187	Spt5	11929.8	-0.446773	0.0840489	-5.31563	1.0629e-07	1.67107e-06
7493	dpr18	2475.88	0.889164	0.167364	5.31277	1.0797e-07	1.69379e-06
12414	jnj	7653.32	-0.465837	0.0877378	-5.30943	1.09969e-07	1.72142e-06
5880	Mtap	1840.52	0.671834	0.126634	5.30533	1.12471e-07	1.75679e-06
5785	Egfr	7355.59	-0.592178	0.11164	-5.30433	1.13086e-07	1.76448e-06
4120	RpS19b	142.434	2.48761	0.469088	5.30306	1.13874e-07	1.77296e-06
14259	dsh	4935.26	-0.504805	0.095188	-5.30324	1.13765e-07	1.77296e-06
9612	Dys	18760	0.519547	0.0980358	5.29956	1.16079e-07	1.8034e-06
4112	Rab7	6734.7	0.461019	0.0870133	5.29826	1.16909e-07	1.81241e-06
14841	Wnt5	4947.04	0.504936	0.0953077	5.29796	1.17107e-07	1.81353e-06
9403	corn	43833.6	-0.601617	0.113673	-5.29252	1.20642e-07	1.86428e-06
9763	Incenp	20353.1	-0.486702	0.0920226	-5.28894	1.23025e-07	1.89908e-06
10130	CG9932	3728.06	-0.641956	0.121475	-5.28469	1.25918e-07	1.93959e-06
9750	pic	19543.6	-0.48785	0.092337	-5.28337	1.2683e-07	1.94981e-06
7764	for	2263.35	0.628332	0.118991	5.28051	1.28828e-07	1.97391e-06
16677	Eno	31630.4	0.496451	0.0941191	5.27472	1.32962e-07	2.03294e-06
15503	upSET	44286.2	-0.400999	0.0760218	-5.27479	1.32909e-07	2.03294e-06
3387	Sap47	40084.6	0.844786	0.160175	5.27413	1.33386e-07	2.03726e-06
7387	Cdc23	3688.23	-0.505351	0.0959226	-5.26831	1.37682e-07	2.09846e-06
6081	Poxn	12654.6	0.456525	0.0866593	5.26805	1.37883e-07	2.09931e-06
7659	armi	7174.68	-0.506835	0.0965746	-5.24812	1.53656e-07	2.33454e-06
9050	Snoo	21218.2	0.443111	0.0844389	5.24771	1.53999e-07	2.33572e-06
7590	CG3618	4841.9	0.541514	0.103205	5.24698	1.54614e-07	2.34172e-06
7689	Ptp99A	17290.3	0.547971	0.104449	5.24632	1.55167e-07	2.34763e-06
2707	neur	15076.9	-0.504794	0.0962569	-5.24424	1.5693e-07	2.36935e-06
15083	MYPT-75D	4453.15	-0.549729	0.104831	-5.24395	1.57173e-07	2.37054e-06
15949	Cpr66D	565.442	-1.23772	0.236173	-5.24074	1.59931e-07	2.40963e-06
6705	wun2	841.238	0.919089	0.175391	5.24023	1.60373e-07	2.41377e-06
165	CG3857	607	1.10798	0.211827	5.23058	1.68982e-07	2.53281e-06
14255	CG11756	107.994	-1.98144	0.379073	-5.22707	1.72216e-07	2.57861e-06
1249	ihog	2672.5	-0.618112	0.118623	-5.21071	1.88117e-07	2.80508e-06
13989	Mrtf	9056.86	-0.467068	0.089747	-5.20427	1.94757e-07	2.88623e-06
15718	CG11652	1886.1	0.609225	0.11707	5.20392	1.95133e-07	2.88885e-06
1229	CG9596	3499.63	-0.508288	0.0976796	-5.20363	1.95433e-07	2.89032e-06
9573	cwo	3876.31	0.859962	0.165399	5.19931	2.00027e-07	2.94622e-06
14859	CG7358	8069.51	-0.490758	0.0943939	-5.19904	2.00318e-07	2.94751e-06
3241	NK7.1	2621.85	0.623639	0.120013	5.19644	2.03141e-07	2.98601e-06
14154	mas	411.409	1.47269	0.283575	5.19329	2.06614e-07	3.02283e-06
6309	Nrk	3222.21	0.545005	0.104943	5.19336	2.06529e-07	3.02283e-06
6737	Hydr1	4369.71	-0.482416	0.0928936	-5.19322	2.06691e-07	3.02283e-06
949	Mms19	4135.03	-0.553216	0.106538	-5.19264	2.07332e-07	3.02914e-06
12507	Ote	6982.73	-0.457954	0.0882238	-5.19082	2.0937e-07	3.05582e-06
5790	CG10321	6405.05	-0.516962	0.0996037	-5.19018	2.10087e-07	3.06321e-06
2885	CG14696	6629.92	0.523305	0.100849	5.18898	2.11454e-07	3.08003e-06
6216	Arc2	434.575	-1.65249	0.31868	-5.18543	2.15523e-07	3.13614e-06
10651	yellow-d	1532.7	-1.23136	0.237494	-5.18478	2.16265e-07	3.14378e-06
229	eIF3g1	15425.1	-0.483633	0.0933757	-5.17943	2.22567e-07	3.23214e-06
3840	Rab11	9716.4	0.460248	0.0888676	5.17903	2.23046e-07	3.23585e-06
2690	Kdm2	5458.62	0.475201	0.0918378	5.17435	2.28706e-07	3.30801e-06
1801	kek1	5972.83	0.500551	0.0967667	5.17276	2.30657e-07	3.33288e-06
11818	Inx3	10187.8	-0.466222	0.0901913	-5.16925	2.35029e-07	3.39268e-06
11229	CG17684	5263.37	-0.785055	0.151952	-5.16648	2.3854e-07	3.43993e-06
2209	CG10376	3884.2	-0.487899	0.0944448	-5.16596	2.39203e-07	3.44604e-06
2593	CG2767	3295.6	0.764902	0.148093	5.16501	2.40432e-07	3.45686e-06
5038	Tsp42Ea	1627.22	-0.978247	0.189651	-5.15815	2.49405e-07	3.57521e-06
9906	Reep1	15842.5	-0.470883	0.0913168	-5.15659	2.51491e-07	3.59799e-06
1265	Mnn1	12518.5	0.413233	0.080153	5.15555	2.52892e-07	3.61446e-06
2342	RtGEF	5427.83	-0.48221	0.0935902	-5.15235	2.57239e-07	3.67295e-06
11822	pAbp	435457	0.461427	0.0896779	5.14538	2.66977e-07	3.80075e-06
6671	oys	7141.58	-0.498996	0.0970687	-5.14065	2.73789e-07	3.89389e-06
1572	pim	4678	-0.511943	0.0996143	-5.13925	2.75832e-07	3.91909e-06
14054	kst	37606.8	-0.428443	0.0833827	-5.13827	2.77276e-07	3.93575e-06
16570	Tnpo-SR	3916.19	-0.645679	0.125686	-5.13722	2.78827e-07	3.95388e-06
10506	Coop	2505.89	1.13096	0.220338	5.13282	2.85432e-07	4.03961e-06
15062	CG6836	249.965	-2.42316	0.472653	-5.12673	2.94824e-07	4.15626e-06
15660	RpL10Ab	143669	-0.503101	0.0981943	-5.12353	2.99872e-07	4.22332e-06
14885	CG8010	4145.35	-0.582763	0.113952	-5.1141	3.15242e-07	4.43115e-06
7895	fabp	14559.2	0.591482	0.115723	5.11119	3.20127e-07	4.48675e-06
16729	S	12089.8	0.422095	0.0826218	5.10877	3.24268e-07	4.54037e-06
9661	eIF4G2	28212.4	-0.430245	0.0845124	-5.09091	3.56346e-07	4.96549e-06
10541	rad50	27163.7	-0.654386	0.128584	-5.08917	3.59642e-07	5.0066e-06
14760	CG5800	4210.22	-0.492849	0.0968891	-5.08674	3.64275e-07	5.0626e-06
5855	CG6758	2684.24	-0.550548	0.108245	-5.08613	3.65441e-07	5.07269e-06
1202	COX5B	4618.88	0.608887	0.119741	5.08505	3.67525e-07	5.09184e-06
10746	MAN1	2777.4	-0.570959	0.112315	-5.08354	3.7047e-07	5.12283e-06
979	Ubc6	8080.53	0.477758	0.0940243	5.08121	3.75031e-07	5.18094e-06
6118	unc-5	5040.33	0.835513	0.1649	5.06679	4.04583e-07	5.56792e-06
14372	CG1824	5499.29	-0.470686	0.0929718	-5.06268	4.134e-07	5.66317e-06
5552	CG12772	2762.12	-0.520665	0.102844	-5.06265	4.13461e-07	5.66317e-06
14933	l(1)G0156	9204.89	0.596299	0.117829	5.06071	4.17696e-07	5.71575e-06
10507	Mocs1	1892.41	-0.90463	0.178811	-5.05913	4.21163e-07	5.75775e-06
411	RpL35	98163.2	-0.424486	0.0839789	-5.05468	4.31113e-07	5.88426e-06
1264	MME1	1054.76	-0.784827	0.155304	-5.0535	4.33788e-07	5.91358e-06
11456	hwt	6379.59	0.597282	0.118262	5.05049	4.40688e-07	6.00199e-06
10821	Brca2	2667.97	-0.531752	0.105575	-5.03671	4.73598e-07	6.426e-06
8209	GlyP	8090.36	0.786266	0.156132	5.0359	4.75612e-07	6.44728e-06
1824	Sirt1	10234	-0.511046	0.10152	-5.03395	4.80487e-07	6.50119e-06
631	trbl	4323.71	-0.601176	0.119507	-5.03047	4.89279e-07	6.61396e-06
13944	HBS1	4626.29	-0.496144	0.0987511	-5.02419	5.05569e-07	6.8087e-06
7490	exd	13904.6	0.458223	0.0913283	5.01732	5.23969e-07	7.03684e-06
169	trr	9796.26	-0.437686	0.087241	-5.01698	5.24912e-07	7.04298e-06
3384	EndoU	254.552	1.31171	0.261479	5.0165	5.26221e-07	7.05399e-06
14456	mus101	5759.66	-0.540145	0.107684	-5.01601	5.27549e-07	7.06525e-06
7045	Thd1	25493.7	0.424686	0.0847297	5.01224	5.38007e-07	7.19199e-06
3067	Not10	2748.53	-0.56807	0.113388	-5.00996	5.44408e-07	7.27084e-06
7536	CG17068	3119.58	-0.499385	0.0998715	-5.00028	5.72474e-07	7.62455e-06
4444	CG6420	5051.26	-0.454683	0.0909697	-4.99818	5.78738e-07	7.70089e-06
14652	sl	4448.1	-0.478826	0.0958272	-4.99677	5.82988e-07	7.75031e-06
1015	Fip1	6892.95	-0.452285	0.090662	-4.98869	6.07888e-07	8.0665e-06
6797	CG8248	853.543	0.78941	0.158303	4.98671	6.1416e-07	8.14227e-06
4856	ATPsynC	49747.3	0.656733	0.131745	4.98489	6.19965e-07	8.2117e-06
11264	ebi	8131	-0.41853	0.084007	-4.98209	6.29003e-07	8.32378e-06
7587	CG8891	3269.58	0.598299	0.120156	4.97935	6.37981e-07	8.43488e-06
2767	CG9399	1319.76	0.701229	0.140943	4.97525	6.51641e-07	8.60762e-06
8231	CG5721	4290.79	-0.537711	0.10813	-4.97282	6.5985e-07	8.70809e-06
9793	Atg13	5170.18	-0.505715	0.101748	-4.97025	6.68676e-07	8.81652e-06
13979	dos	4486.61	-0.465652	0.0937376	-4.96761	6.77847e-07	8.91307e-06
15628	Ncc69	10349	-0.61876	0.124705	-4.96179	6.9847e-07	9.17591e-06
3939	Sar1	7407.69	0.434694	0.087621	4.96108	7.01032e-07	9.2012e-06
629	CG5282	1323.69	0.980463	0.197662	4.96029	7.03869e-07	9.23007e-06
4125	TfIIA-S	3687.95	0.524706	0.105788	4.95999	7.04969e-07	9.23612e-06
6829	CG8635	4963.08	-0.455203	0.091893	-4.95362	7.2845e-07	9.53511e-06
16327	Mgstl	1580.63	0.750616	0.151585	4.95178	7.35391e-07	9.60857e-06
6241	Prosap	8285.71	0.597707	0.120751	4.94992	7.4245e-07	9.68331e-06
14775	IntS2	6383.26	-0.455818	0.0920835	-4.95005	7.4194e-07	9.68331e-06
9643	Su(var)3-3	7371.02	-1.13438	0.229275	-4.94768	7.51041e-07	9.78654e-06
9885	nbs	4168.93	-0.543093	0.109861	-4.94348	7.6742e-07	9.96405e-06
3738	mdlc	1669.71	-0.594523	0.120316	-4.94134	7.75865e-07	1.00647e-05
1699	cmet	22912	-0.465221	0.0941623	-4.94063	7.78705e-07	1.00925e-05
6228	Hsc70-5	17870.8	-0.40408	0.0819743	-4.92935	8.25035e-07	1.06738e-05
9202	Orct2	1673.53	-0.643185	0.130558	-4.92643	8.37458e-07	1.08152e-05
3310	ear	6947.31	-0.431638	0.0876343	-4.92544	8.41715e-07	1.08604e-05
432	mof	4659.97	-0.492345	0.0999832	-4.92428	8.46731e-07	1.09154e-05
1546	CG5731	712.252	1.21301	0.246352	4.92388	8.48458e-07	1.0928e-05
3664	cdi	11007	-0.470609	0.0956355	-4.92086	8.61647e-07	1.1088e-05
14382	CkIalpha	8102.4	0.538708	0.109494	4.91998	8.65511e-07	1.11278e-05
4618	CG11873	43682.1	0.392219	0.07975	4.9181	8.7389e-07	1.12156e-05
11969	Su(z)2	3370.9	0.639107	0.130003	4.91609	8.82903e-07	1.13212e-05
10750	RpL12	110323	-0.402557	0.08192	-4.91403	8.92244e-07	1.14207e-05
10915	p130CAS	3717.33	0.532276	0.108331	4.9134	8.95085e-07	1.1447e-05
5001	Bap170	14742.4	-0.408783	0.0832044	-4.913	8.96947e-07	1.14606e-05
11154	Tasp1	2741.75	-0.571986	0.116432	-4.91262	8.9866e-07	1.14724e-05
6285	mip120	5080.5	-0.439863	0.0895745	-4.91058	9.08096e-07	1.15826e-05
10002	Bsg	16666.2	0.447187	0.0910882	4.90938	9.13648e-07	1.16432e-05
5196	CG11906	1854.5	-0.5852	0.119373	-4.90228	9.47326e-07	1.20511e-05
2946	CG14712	5356.93	-0.452413	0.092302	-4.90144	9.51352e-07	1.20917e-05
903	Rheb	2267.98	0.528974	0.107938	4.90073	9.54814e-07	1.2125e-05
9558	Cap-G	13171.7	-0.397991	0.0812749	-4.89686	9.73821e-07	1.23447e-05
7811	nrv2	26236.5	0.789629	0.161333	4.89442	9.85984e-07	1.24771e-05
5168	TBCB	3196.03	0.500682	0.102369	4.89096	1.00345e-06	1.26869e-05
14860	CG7326	3813.11	-0.538949	0.110306	-4.88593	1.02941e-06	1.30038e-05
2538	CRAT	982.967	0.850897	0.174546	4.87491	1.08857e-06	1.37392e-05
9923	RpS24	85287.7	-0.387743	0.0796623	-4.86734	1.13112e-06	1.42513e-05
14470	g	3920.08	0.496861	0.102092	4.86682	1.1341e-06	1.42765e-05
418	CG15771	1324.93	0.846896	0.174023	4.86657	1.13553e-06	1.4282e-05
10701	egl	1637.02	0.578054	0.119001	4.85756	1.18838e-06	1.4882e-05
394	XRCC1	4027.34	-0.478871	0.0985997	-4.85672	1.19347e-06	1.49328e-05
1438	raw	3328.29	0.506075	0.104226	4.85555	1.2005e-06	1.49949e-05
7176	sowah	3931.09	-0.543091	0.111875	-4.85446	1.20718e-06	1.50653e-05
9313	psidin	4929.99	-0.438936	0.0904319	-4.85377	1.21137e-06	1.51045e-05
6480	ADD1	12674.6	-0.44261	0.0912368	-4.85122	1.22702e-06	1.52734e-05
15132	skl	974.895	1.18181	0.243636	4.85071	1.23023e-06	1.53002e-05
3755	CG17186	1431.64	-0.783698	0.16176	-4.84482	1.26724e-06	1.57469e-05
5356	Dlish	918.325	-0.843884	0.174278	-4.84216	1.28434e-06	1.59457e-05
2913	SdhC	4702.99	0.496434	0.102531	4.8418	1.28669e-06	1.59501e-05
8891	CG34195	366.079	-1.11327	0.22993	-4.84177	1.2869e-06	1.59501e-05
14315	ATP7	4562.47	-0.515475	0.106523	-4.83908	1.30439e-06	1.6153e-05
7024	Ady43A	11042.4	0.431535	0.0892216	4.83666	1.32037e-06	1.63368e-05
13562	PRAS40	6964.22	0.525636	0.108687	4.83626	1.32305e-06	1.6356e-05
490	RpL7A	204314	-0.395814	0.0819424	-4.8304	1.36258e-06	1.6816e-05
3206	foxo	6237.46	0.454133	0.0940638	4.82793	1.37962e-06	1.69828e-05
15017	cyc	2119.2	-0.596257	0.123499	-4.82804	1.37885e-06	1.69828e-05
2362	phr6-4	960.849	-0.712388	0.147612	-4.82608	1.39247e-06	1.71264e-05
10483	Galt	592.351	1.04043	0.215683	4.82387	1.40799e-06	1.73026e-05
5287	Pcl	6893.26	-0.495005	0.102625	-4.82342	1.4112e-06	1.73273e-05
2278	Top3alpha	5815.86	-0.427601	0.0887353	-4.81884	1.44395e-06	1.76995e-05
8467	CG30383	1075.81	-0.79246	0.164476	-4.81808	1.44947e-06	1.7737e-05
75	CG3655	6400.19	-0.573228	0.119015	-4.81644	1.46143e-06	1.78682e-05
2826	Mical	31997	-0.40816	0.0847817	-4.81425	1.47753e-06	1.80499e-05
7592	endos	7526.04	0.413171	0.0858653	4.81185	1.49536e-06	1.8236e-05
16492	msl-2	4678.6	-0.4796	0.0996739	-4.8117	1.49655e-06	1.8236e-05
786	Csp	14519.5	0.4393	0.0914292	4.80481	1.54898e-06	1.88272e-05
2787	CG8507	3681.44	-0.495695	0.103193	-4.80356	1.55873e-06	1.89299e-05
5010	CG3270	1628.72	0.608753	0.12674	4.80315	1.56185e-06	1.89518e-05
6201	phyl	4103.8	0.467022	0.0974097	4.79441	1.63152e-06	1.97641e-05
16512	CG9663	1371.79	0.685134	0.143015	4.79064	1.66249e-06	2.01224e-05
10877	uzip	14601	0.455452	0.0952912	4.77958	1.75663e-06	2.12263e-05
3431	CG31279	52.3809	-2.87676	0.602104	-4.77785	1.77182e-06	2.13386e-05
10805	betaTub60D	5136.39	0.576957	0.120834	4.77479	1.79896e-06	2.16474e-05
1024	CG9855	4218.05	-0.476667	0.099838	-4.77441	1.80237e-06	2.16704e-05
10280	Fs(2)Ket	75265.6	-0.432685	0.0906889	-4.77109	1.83231e-06	2.2012e-05
9463	Mob4	6338.24	0.48421	0.10161	4.76536	1.88515e-06	2.26281e-05
10956	CG13893	2571.55	0.507237	0.106471	4.76409	1.89709e-06	2.27336e-05
13864	CG2211	1713.03	-0.554252	0.116424	-4.76065	1.92969e-06	2.31051e-05
7272	MRP	14138.1	-0.397604	0.0835408	-4.75939	1.94174e-06	2.32303e-05
13886	CG13920	2644.29	0.658531	0.13852	4.75405	1.99378e-06	2.38331e-05
8610	RpL15	99458.3	-0.454453	0.0956244	-4.75248	2.00933e-06	2.39793e-05
3884	CG7956	13199	-0.49579	0.104481	-4.74525	2.08251e-06	2.48117e-05
7901	gukh	37856.8	-0.494748	0.10435	-4.74125	2.12407e-06	2.5286e-05
546	Spp	3758.91	-0.480708	0.101469	-4.73749	2.16383e-06	2.57381e-05
6333	GLaz	711.435	-0.783696	0.16551	-4.73503	2.19022e-06	2.5988e-05
9756	Ubr3	16384.2	0.406146	0.0858161	4.73275	2.21503e-06	2.62608e-05
15027	Taf6	4320.55	-0.609736	0.12909	-4.72335	2.31995e-06	2.74822e-05
14648	CG3679	5219.81	0.661758	0.140211	4.71972	2.36171e-06	2.79312e-05
7085	Gyf	37991.4	-0.366435	0.0776619	-4.71835	2.3777e-06	2.80972e-05
7692	HIP-R	9095.8	0.725652	0.153915	4.71463	2.42145e-06	2.8591e-05
2976	Hsp70Ab	17203.3	-3.12379	0.66342	-4.70862	2.49401e-06	2.93757e-05
6266	CG6543	1826.51	0.55245	0.117436	4.70427	2.54777e-06	2.99115e-05
6774	lin	3712.89	-0.461432	0.0981582	-4.7009	2.59021e-06	3.0385e-05
4216	REPTOR	18598.5	0.632623	0.134633	4.69888	2.61586e-06	3.06115e-05
8169	sm	14998.4	0.751268	0.160026	4.69467	2.67042e-06	3.12247e-05
7205	pros	95313.6	0.578563	0.123245	4.69441	2.67377e-06	3.12353e-05
15249	CG32164	16737.1	-0.370235	0.0788732	-4.69405	2.6785e-06	3.12434e-05
14346	Lsm12	12795	-0.733667	0.156815	-4.67855	2.88905e-06	3.3618e-05
13184	Topors	4822.55	-0.434383	0.0928863	-4.6765	2.91806e-06	3.39283e-05
6775	CG8243	5495.17	-0.481909	0.103056	-4.67617	2.9228e-06	3.39561e-05
9601	Mppe	1548.98	-0.602217	0.128799	-4.67562	2.93074e-06	3.4021e-05
15148	CG13698	1447.08	-0.880826	0.188522	-4.67227	2.97886e-06	3.45519e-05
14462	AMPdeam	7503.02	-0.517388	0.110865	-4.66681	3.0591e-06	3.54542e-05
11700	Strn-Mlck	6888.85	2.14537	0.459818	4.66568	3.07592e-06	3.55921e-05
14879	Vav	6072.73	-0.483302	0.103586	-4.66571	3.07555e-06	3.55921e-05
9867	RhoGAP18B	2167.12	-1.00054	0.214657	-4.66111	3.14513e-06	3.63058e-05
5331	Smurf	10676	-0.468288	0.100594	-4.65523	3.23615e-06	3.73266e-05
15322	Mbs	12945.6	-0.414622	0.0890963	-4.65364	3.26121e-06	3.75558e-05
15428	Prp31	5479.84	-0.557986	0.119979	-4.6507	3.30817e-06	3.80664e-05
3289	eff	19248.5	0.451784	0.0971526	4.65025	3.31532e-06	3.80886e-05
1605	Cand1	15815.7	-0.367204	0.0789698	-4.64993	3.3205e-06	3.81172e-05
449	CG32756	5497.88	-0.436257	0.0938291	-4.64948	3.32769e-06	3.81467e-05
15592	CG32113	12679.2	-0.406369	0.0874101	-4.649	3.33552e-06	3.81987e-05
2995	GCC185	4628	-0.516351	0.111241	-4.64175	3.45463e-06	3.95314e-05
4293	ssh	6917.11	-0.402572	0.0867666	-4.63971	3.48891e-06	3.98922e-05
2008	Ku80	4375	-0.534212	0.115166	-4.63861	3.50756e-06	4.00421e-05
3971	loco	7815.41	-0.391386	0.084435	-4.63536	3.56324e-06	4.06457e-05
10161	Rbp	7373.06	0.824743	0.177965	4.63429	3.58162e-06	4.08231e-05
9786	Cpsf73	6009.96	-0.429707	0.0927619	-4.63236	3.61512e-06	4.11725e-05
3783	H	9982.93	-0.384779	0.0831074	-4.62991	3.65827e-06	4.15658e-05
16031	cert	3908.13	-0.445154	0.096183	-4.62819	3.6887e-06	4.18463e-05
2992	Sbf	7989.41	-0.415041	0.0897294	-4.62548	3.73735e-06	4.22981e-05
14695	CG4880	1634.83	-0.557801	0.120864	-4.6151	3.92903e-06	4.43981e-05
3931	Mitofilin	9788.39	0.391941	0.0849623	4.61312	3.96679e-06	4.47897e-05
4468	Tsp97E	4335.39	0.477298	0.10348	4.61249	3.97883e-06	4.48557e-05
9600	kuz	16573	-0.388595	0.0842905	-4.61019	4.02301e-06	4.53184e-05
10518	Fic	1656.07	-0.553432	0.12006	-4.60963	4.03387e-06	4.54054e-05
3725	CG4662	3530.26	0.503304	0.109295	4.60502	4.12432e-06	4.63874e-05
8805	MFS17	10538.3	-0.404851	0.0879343	-4.60402	4.14408e-06	4.65734e-05
7108	CG10638	5297.87	-0.517593	0.11252	-4.60001	4.22466e-06	4.74422e-05
7414	CG10417	12834.3	-0.38751	0.0842551	-4.59925	4.24015e-06	4.75792e-05
15867	vsg	15537.5	0.426067	0.0926426	4.59904	4.24449e-06	4.75909e-05
15632	ssp	3683.89	-0.485564	0.105602	-4.59805	4.2646e-06	4.77793e-05
3684	Dl	12180.9	0.48377	0.105245	4.59662	4.29394e-06	4.80336e-05
14327	gd	6753.32	-0.742548	0.161583	-4.59546	4.31792e-06	4.82646e-05
7756	GstS1	3351.05	2.89515	0.630036	4.59522	4.32299e-06	4.8284e-05
3772	CG4360	8834.37	-0.410723	0.0894624	-4.59101	4.41108e-06	4.92298e-05
4980	SCAP	10400.8	-0.455622	0.0992553	-4.5904	4.42388e-06	4.93346e-05
8676	RpL38	80808.6	-0.507134	0.110504	-4.58927	4.44803e-06	4.95657e-05
15111	ftz-f1	25777.8	-0.507014	0.110524	-4.58739	4.48828e-06	4.99758e-05
5174	FK506-bp2	15775	0.41871	0.0912888	4.58666	4.504e-06	5.01122e-05
8215	Neb-cGP	4861.24	0.576667	0.125742	4.58612	4.51551e-06	5.02017e-05
13728	Girdin	6319.46	-0.413644	0.0902283	-4.58441	4.55261e-06	5.05364e-05
1508	Gdi	10487.4	0.435605	0.0950944	4.58076	4.63287e-06	5.13879e-05
4672	Pcd	1464.39	0.610648	0.133339	4.57966	4.65737e-06	5.15806e-05
7558	Arp2	8941.94	-0.427204	0.0932823	-4.57969	4.65668e-06	5.15806e-05
7117	CG1354	16197.7	-0.395043	0.0862704	-4.57912	4.66932e-06	5.1631e-05
1048	CG5828	1960.87	0.613308	0.134043	4.57546	4.75176e-06	5.24252e-05
1204	CG11050	7346.73	-0.404405	0.0884045	-4.57449	4.77386e-06	5.26289e-05
16432	ed	20694.7	-0.378428	0.0828805	-4.56595	4.97237e-06	5.46092e-05
4655	Trc8	4496.77	-0.455762	0.0998367	-4.56508	4.9931e-06	5.47953e-05
4892	Acf	21260	-0.382052	0.0837188	-4.56352	5.03025e-06	5.51611e-05
10684	levy	8453.27	0.573606	0.125812	4.55925	5.13374e-06	5.62533e-05
2723	GstZ2	18331.8	0.522979	0.114725	4.55855	5.15072e-06	5.63967e-05
11538	CG43999	201.377	-1.72162	0.377713	-4.558	5.16423e-06	5.64591e-05
3372	spn-E	4671.57	-0.63517	0.139523	-4.55243	5.30309e-06	5.78897e-05
8353	spen	173766	-0.346751	0.0761733	-4.55213	5.31052e-06	5.79271e-05
11027	CG43427	7469.74	0.447685	0.0983852	4.55032	5.35633e-06	5.82949e-05
5376	RhoGAP54D	5957.26	-0.429165	0.0943206	-4.55007	5.36284e-06	5.83219e-05
7040	CG11360	33683.3	0.41494	0.091307	4.54445	5.50791e-06	5.98096e-05
7783	CG3651	10651.9	-0.461362	0.101522	-4.54446	5.50751e-06	5.98096e-05
13730	prage	1554.31	0.676267	0.148849	4.54331	5.53768e-06	6.00427e-05
4142	Apc2	5306.6	-0.475492	0.104929	-4.53155	5.85536e-06	6.32501e-05
14474	Lig4	2002.72	-0.666739	0.147203	-4.52939	5.9155e-06	6.3831e-05
10605	CG2852	13783.4	0.405523	0.0896127	4.52529	6.03142e-06	6.50063e-05
10667	vir	8395.6	-0.423103	0.0936278	-4.51899	6.2135e-06	6.67897e-05
779	CG7130	1060.19	-0.815437	0.180522	-4.5171	6.26908e-06	6.72172e-05
9926	RpL8	181972	-0.337743	0.0748006	-4.51524	6.32444e-06	6.7612e-05
2222	Catsup	5795.79	-0.404212	0.0895267	-4.51498	6.33218e-06	6.7612e-05
14161	CG11593	4132.43	-0.470514	0.104213	-4.51492	6.33395e-06	6.7612e-05
6502	pyr	1956.53	0.529736	0.117534	4.50708	6.57256e-06	7.00041e-05
7663	mud	34873.5	-0.372198	0.0825972	-4.50619	6.60035e-06	7.02483e-05
3238	ATPsynE	4993.05	0.616858	0.136933	4.50481	6.6431e-06	7.06513e-05
4038	EloA	4101.42	-0.551567	0.122505	-4.5024	6.71912e-06	7.14073e-05
205	CG2918	15066.4	-0.358029	0.0795342	-4.50157	6.74541e-06	7.16341e-05
1245	sip2	15970	-0.514886	0.114422	-4.49987	6.79961e-06	7.21567e-05
10498	bel	23385	0.359604	0.0799272	4.49914	6.82277e-06	7.23494e-05
3922	Fadd	677.053	-0.724505	0.16105	-4.49864	6.8388e-06	7.24662e-05
9388	CG42260	8577.85	-0.490578	0.109076	-4.4976	6.87244e-06	7.27694e-05
2473	CG1234	7576.82	-0.570882	0.126967	-4.49629	6.91482e-06	7.31111e-05
7046	Asator	13910.8	0.370888	0.0825807	4.49122	7.08171e-06	7.4821e-05
4279	vig2	32744	0.41992	0.0936225	4.48525	7.28288e-06	7.66105e-05
14260	Pa1	4395.25	-0.567354	0.126551	-4.48321	7.35275e-06	7.72894e-05
7940	fax	16366.1	0.428367	0.0956786	4.47715	7.56474e-06	7.94023e-05
9421	CG42300	30.31	-3.93959	0.881004	-4.47171	7.75967e-06	8.13304e-05
940	ksr	6522.6	-0.393389	0.0879812	-4.47129	7.77503e-06	8.14323e-05
7525	CG13124	3090.57	-0.745663	0.166798	-4.47044	7.8057e-06	8.16944e-05
11625	RapGAP1	2561.81	0.815081	0.18241	4.46841	7.88024e-06	8.23982e-05
4516	side	3488.84	0.819098	0.183324	4.46804	7.894e-06	8.24396e-05
16277	Cyt-c1	9324.5	0.488274	0.10929	4.46771	7.90626e-06	8.2508e-05
16611	CG9967	1977.8	-0.674856	0.151145	-4.46495	8.00879e-06	8.35178e-05
14938	CG32533	9005.2	0.437635	0.0980933	4.46141	8.14203e-06	8.4846e-05
1500	CG31710	382.32	-1.06207	0.23819	-4.45892	8.23725e-06	8.57148e-05
11292	bru3	7078.49	0.645387	0.144765	4.45816	8.26674e-06	8.59599e-05
9272	pix	45347.6	-0.452095	0.101424	-4.45747	8.29335e-06	8.61745e-05
711	CG32441	2884.36	-0.44807	0.100566	-4.45546	8.37133e-06	8.68601e-05
5557	Caf1-180	6853.25	-0.466926	0.104909	-4.45076	8.55656e-06	8.8602e-05
193	pcx	15250.5	-0.461323	0.103678	-4.44957	8.60426e-06	8.89578e-05
2816	Best1	3490.48	0.5558	0.125011	4.44599	8.74861e-06	9.03856e-05
2656	CG8202	5101.01	-0.49389	0.111144	-4.44369	8.84304e-06	9.12309e-05
1476	Aldh	38664.2	0.415283	0.093465	4.44319	8.86353e-06	9.13771e-05
15783	JIL-1	9614.87	-0.371568	0.0836366	-4.44265	8.8856e-06	9.14742e-05
3429	pad	2574.83	-0.482208	0.108584	-4.44086	8.96012e-06	9.21758e-05
4560	NSD	15037.2	-0.403208	0.0908005	-4.44059	8.9712e-06	9.22242e-05
4770	Fer1HCH	25852.9	0.362646	0.0816992	4.4388	9.04615e-06	9.29287e-05
6467	CG8878	13256	-0.405117	0.0913008	-4.43717	9.11483e-06	9.35677e-05
15016	trc	3748	-0.486064	0.109552	-4.43682	9.12972e-06	9.36541e-05
14634	Paf-AHalpha	2137.66	0.511222	0.115262	4.43531	9.19395e-06	9.41794e-05
1414	D12	3655.87	-0.500509	0.112892	-4.43351	9.27126e-06	9.4837e-05
13781	Mcm3	11279.8	-0.421737	0.0951434	-4.43264	9.30843e-06	9.51499e-05
5692	ras	14247.8	0.412413	0.0931587	4.427	9.55539e-06	9.74677e-05
7138	Atpalpha	95790.4	0.837499	0.189209	4.42631	9.58596e-06	9.77106e-05
16461	ND-PDSW	4735.08	0.448642	0.101448	4.42237	9.76231e-06	9.93681e-05
14455	CG11158	709.299	0.750846	0.169812	4.42163	9.79595e-06	9.95703e-05
6724	wun	1739.41	0.587798	0.133041	4.41817	9.95403e-06	0.000101106
9311	CG42231	3468.22	-0.44939	0.101825	-4.41337	1.01775e-05	0.000103231
264	dnc	6594.22	0.714229	0.161918	4.41105	1.02872e-05	0.000104198
13802	RpL19	116358	-0.339018	0.0769045	-4.4083	1.04185e-05	0.000105184
973	CG12007	1467.74	-0.576099	0.13076	-4.40578	1.05404e-05	0.000106316
7411	d4	6425.05	-0.463133	0.105129	-4.4054	1.0559e-05	0.000106355
6772	Ggamma1	28333.9	0.608637	0.138241	4.40272	1.069e-05	0.0001076
5743	Xbp1	18116.4	-0.407824	0.0927207	-4.39842	1.09044e-05	0.000109605
16430	Vps53	2843.81	-0.456587	0.103903	-4.39434	1.1111e-05	0.000111449
6113	scb	2157.56	-0.898915	0.204596	-4.39362	1.1148e-05	0.000111743
7792	tapas	5657.88	0.443866	0.101074	4.3915	1.1257e-05	0.000112523
3055	Cog1	3935.71	-0.41626	0.0947876	-4.3915	1.12569e-05	0.000112523
4610	wdn	5754.75	-0.475061	0.108249	-4.3886	1.14085e-05	0.000113959
15915	Hsp67Ba	3026.64	-0.682192	0.155513	-4.38671	1.15078e-05	0.000114871
3595	CG8064	7050.77	-0.440006	0.100463	-4.37978	1.18801e-05	0.000118424
2551	CG10445	2183.54	-0.568166	0.129746	-4.37905	1.19196e-05	0.000118736
8339	CG3164	10852.2	0.591833	0.135208	4.37722	1.20201e-05	0.000119573
4922	eEF2	363671	-0.339105	0.0775156	-4.37467	1.21618e-05	0.000120899
6613	Caf1-105	3207.57	-0.47736	0.109269	-4.36866	1.25011e-05	0.000124187
7805	Asap	20519.8	-0.370903	0.0849801	-4.36458	1.27367e-05	0.00012644
4457	CG14252	1051.23	-0.762964	0.175133	-4.3565	1.3216e-05	0.00013075
2070	CG31815	1591.18	0.679457	0.15604	4.35437	1.33449e-05	0.000131845
4037	CenB1A	6111.7	-0.482518	0.110826	-4.35383	1.33779e-05	0.00013208
14884	CG32537	2223.9	-0.528423	0.121384	-4.35331	1.34098e-05	0.000132305
13214	Myo81F	2803.84	0.467417	0.107393	4.35239	1.3466e-05	0.000132678
6585	RpS15Ab	4596.86	0.50806	0.116845	4.34813	1.37301e-05	0.000135097
10825	CG11414	8209.3	-0.444538	0.102254	-4.34738	1.37774e-05	0.00013547
13927	CG12099	6750.15	0.613253	0.14107	4.34715	1.37916e-05	0.000135517
9525	Hip14	4280.6	0.451413	0.103905	4.34446	1.3962e-05	0.000137006
13766	Impbeta11	7146.74	-0.380119	0.0875096	-4.34375	1.40074e-05	0.000137358
15870	ATPsynB	9929.65	0.552065	0.127142	4.34213	1.41108e-05	0.000138278
14057	Ids	555.02	0.848891	0.195553	4.34097	1.41854e-05	0.000138915
15127	not	3075.47	0.433433	0.099917	4.33793	1.43832e-05	0.000140504
1285	chm	3668.02	-0.418545	0.0964862	-4.33788	1.43865e-05	0.000140504
14839	CG6470	107.459	1.7897	0.412606	4.33754	1.44083e-05	0.000140622
5899	Tes	7156.38	0.396525	0.0914357	4.33665	1.44668e-05	0.000141085
15814	Rbfox1	28695.4	0.384793	0.0887579	4.33531	1.45554e-05	0.00014158
7642	emc	12804.7	-0.415114	0.095776	-4.33422	1.46281e-05	0.000142191
7715	CG14683	3272.7	0.60385	0.139429	4.33088	1.48517e-05	0.000144132
1538	RpL7	134632	-0.320414	0.0740335	-4.32796	1.505e-05	0.000145705
14129	pav	15876.5	-0.342352	0.07911	-4.32754	1.50781e-05	0.000145879
305	Mnt	5230.98	0.47599	0.110078	4.32412	1.53143e-05	0.000148066
11263	dally	8352.75	0.642235	0.148601	4.32188	1.54702e-05	0.000149274
2453	sas	364.559	-1.40763	0.325691	-4.32198	1.54638e-05	0.000149274
10412	SERCA	24718	0.450107	0.104152	4.32164	1.54875e-05	0.00014934
2165	Fas3	1327.6	-0.817403	0.189276	-4.31857	1.57043e-05	0.000151229
16228	loj	1748.26	-0.563722	0.130542	-4.31832	1.57219e-05	0.000151298
321	CG6428	1257.35	-0.619435	0.143461	-4.31781	1.57588e-05	0.000151552
7310	CG13404	1433.95	0.811009	0.187853	4.31725	1.57986e-05	0.000151834
1274	Pvf2	1022.2	-1.42921	0.331251	-4.31459	1.59903e-05	0.000153574
11819	l(3)neo38	20136.9	0.338331	0.0785064	4.3096	1.63553e-05	0.000156768
2207	Faf2	5325.89	0.46824	0.108758	4.30533	1.66735e-05	0.000159501
10959	klar	67166.7	-0.391599	0.0909546	-4.30543	1.6666e-05	0.000159501
9219	l(2)k09022	17640.4	-0.38864	0.0902861	-4.30454	1.67331e-05	0.00015986
16598	Atxn7	2739.4	0.470689	0.109358	4.30413	1.67645e-05	0.000160054
15079	CG18135	5274.19	0.436606	0.101637	4.29573	1.74119e-05	0.000165743
5223	CG18190	4766.6	0.541249	0.126004	4.29549	1.74308e-05	0.000165759
3776	CG5180	3247.91	-0.437842	0.102014	-4.29197	1.77098e-05	0.000168301
9427	CG42307	3699.85	0.462334	0.107821	4.28798	1.80304e-05	0.000171123
6753	Pkn	17796.5	-0.374584	0.0873971	-4.286	1.81921e-05	0.000172545
9351	roh	6335.02	0.402523	0.0939818	4.28299	1.84399e-05	0.000174323
6092	eIF2Bgamma	4160.19	-0.428956	0.10028	-4.27759	1.88925e-05	0.000178369
3942	CG18596	4939.29	-0.609901	0.142599	-4.27703	1.89401e-05	0.000178585
4399	E(spl)m7-HLH	387.384	-1.24878	0.292098	-4.27521	1.90955e-05	0.000179933
11331	CG43778	8272.23	0.893063	0.20891	4.27488	1.91244e-05	0.000180088
14040	eIF1	6681.98	0.411355	0.0962608	4.27334	1.92566e-05	0.000180862
6422	CG8818	7315.64	-0.465133	0.108866	-4.27252	1.93272e-05	0.000181408
13893	CG13921	2641.53	0.504519	0.118103	4.27184	1.93866e-05	0.000181729
4175	CG6454	7722.09	-0.362128	0.0847999	-4.27039	1.95134e-05	0.000182799
5441	CG14434	5929.29	0.446806	0.104637	4.27007	1.95408e-05	0.000182938
14029	CG15812	3896.21	-0.436814	0.1023	-4.26992	1.95546e-05	0.000182948
11151	l(3)72Ab	25235.8	-0.394002	0.0923082	-4.26834	1.96935e-05	0.00018401
4133	SMC1	11773.2	-0.37751	0.0884963	-4.26583	1.99159e-05	0.000185848
13711	Vha26	16191.8	0.482077	0.113065	4.26371	2.01057e-05	0.000187498
2727	CG9356	1498.07	-0.539822	0.126656	-4.26212	2.02495e-05	0.000188596
2741	CG16789	1381.45	-0.888161	0.208523	-4.2593	2.05071e-05	0.000190627
16608	CG3609	1804.97	0.663846	0.155887	4.25852	2.05786e-05	0.000191168
5394	Cdc7	4856.61	0.415838	0.0976699	4.25758	2.06652e-05	0.000191849
5363	CG6406	2364.43	-0.462306	0.108604	-4.25679	2.07381e-05	0.000192403
4413	E(spl)mbeta-HLH	1006.16	-0.610414	0.143423	-4.25603	2.08086e-05	0.000192933
7827	mus201	5627.21	-0.497639	0.116942	-4.25545	2.08627e-05	0.000193311
6715	CG1902	1440.44	0.817479	0.192494	4.24677	2.16874e-05	0.000200438
15026	CG9330	7357.54	-0.389554	0.0918239	-4.2424	2.21139e-05	0.000203859
10950	MED14	10726.5	-0.351107	0.0828819	-4.23624	2.27297e-05	0.000209269
4726	Axn	4731.02	-0.403694	0.0953087	-4.23564	2.27901e-05	0.000209558
564	CG11454	2261.67	-0.481759	0.113736	-4.23576	2.27784e-05	0.000209558
6312	FLASH	2976.33	-0.544309	0.128658	-4.23067	2.32998e-05	0.000213973
10666	Golgin245	6660.1	-0.43015	0.101776	-4.22642	2.37433e-05	0.00021777
8448	Lcch3	2279.18	0.623764	0.147703	4.2231	2.4096e-05	0.000220725
7018	pk	4812.43	0.498378	0.11808	4.22066	2.43583e-05	0.000222845
14951	CG12702	5056.15	-0.52086	0.123546	-4.21592	2.48761e-05	0.000227438
6472	otk	15099.5	0.443008	0.105177	4.21201	2.53113e-05	0.000231272
10703	l(2)not	1665.49	-0.524292	0.124542	-4.20976	2.55642e-05	0.000233435
39	Appl	18132	0.787864	0.18718	4.20913	2.56355e-05	0.000233938
1102	CG14015	1119.06	0.769323	0.182912	4.20597	2.59959e-05	0.000237078
13535	Frl	14377.4	-0.426223	0.101398	-4.20345	2.6288e-05	0.000239289
5109	CG16868	4714.28	-0.399229	0.0950996	-4.19801	2.69265e-05	0.000244947
15460	Tdrd3	5226.34	-0.405997	0.0967332	-4.19708	2.70384e-05	0.000245501
5359	Vps50	3580.95	-0.462159	0.110221	-4.19302	2.75264e-05	0.000249462
2956	CG6923	4193.37	-0.676015	0.161289	-4.19133	2.77328e-05	0.000251176
4306	Nup358	73533.6	-0.362722	0.0865632	-4.19025	2.78646e-05	0.000251896
16394	CG3008	6819.38	-0.533174	0.127266	-4.18946	2.79619e-05	0.000252617
6601	wde	13609.2	-0.426151	0.101738	-4.18869	2.80568e-05	0.000253317
4308	CG11858	1742.4	0.61449	0.146816	4.18545	2.84597e-05	0.00025638
15595	Wbp2	6307.1	-0.389919	0.0931696	-4.18504	2.85112e-05	0.00025638
5788	mahj	13112.9	-0.356071	0.0852136	-4.17858	2.9334e-05	0.000263042
15976	CG7120	2390.68	0.445319	0.106684	4.17421	2.99024e-05	0.000267807
3510	CG18213	7818.16	-0.591149	0.141636	-4.17371	2.99675e-05	0.000268224
5037	CG17002	3850.11	-0.435338	0.104311	-4.17348	2.99983e-05	0.000268334
919	CG2100	2022.26	0.489971	0.117433	4.17235	3.01477e-05	0.000269503
4763	Fer2LCH	21174.9	0.43012	0.103212	4.16737	3.08136e-05	0.000275116
1468	CG31886	279.267	1.17536	0.282068	4.16695	3.08702e-05	0.000275451
3303	mRpS10	869.77	0.723684	0.173727	4.16564	3.10478e-05	0.000276694
14095	Scsalpha	8758.21	0.414036	0.0994264	4.16425	3.12378e-05	0.000278216
9955	CG42709	35415.2	0.320203	0.0769774	4.15971	3.18657e-05	0.000283634
6794	FANCI	8297.06	-0.347318	0.0835467	-4.15717	3.22212e-05	0.000286446
7850	CG9485	4231.25	0.554374	0.133463	4.15375	3.27069e-05	0.000290406
6657	COX7C	6824.54	0.473016	0.113886	4.15342	3.27541e-05	0.000290469
2046	Syx5	6004.01	-0.60334	0.145318	-4.15187	3.29774e-05	0.000291912
3869	mod(mdg4)	42312.8	-0.322094	0.0776605	-4.14746	3.3618e-05	0.000296856
7081	CG11077	1589.39	0.555627	0.134023	4.14575	3.38697e-05	0.000298638
1055	eIF3h	44343.4	-0.442983	0.106847	-4.14595	3.38411e-05	0.000298638
4617	Sirt7	2930.78	-0.503754	0.121535	-4.14492	3.39939e-05	0.000299444
106	Lrpprc2	7550.94	-0.360559	0.0870031	-4.14421	3.40992e-05	0.000300189
14397	ade5	8774.27	0.518368	0.125145	4.14215	3.44066e-05	0.000302527
6213	CG8531	8263.49	-0.409864	0.0989829	-4.14075	3.46169e-05	0.000304191
6202	CG17385	3906.86	0.442491	0.106899	4.13935	3.48287e-05	0.000305867
12631	Sec6	2430.2	-0.436319	0.105491	-4.13608	3.53284e-05	0.000310067
765	MED1	12532.9	-0.362417	0.0876935	-4.13277	3.58424e-05	0.000314387
5609	CG17754	2787.38	-0.434002	0.105062	-4.13089	3.61354e-05	0.000316765
9925	RpS29	174621	-0.399337	0.0967203	-4.12878	3.6469e-05	0.000319302
6904	sax	4981.25	-0.398759	0.0966265	-4.1268	3.67841e-05	0.000321866
3825	CG3822	4726.23	0.425838	0.103194	4.12658	3.68192e-05	0.000321979
5447	Dok	4008.33	-0.583001	0.141423	-4.12239	3.74962e-05	0.000327503
11285	CG43737	12934.5	0.558735	0.135566	4.12149	3.76437e-05	0.000328593
14188	Cip4	6344.8	-0.399011	0.0968255	-4.12093	3.77344e-05	0.000329186
7588	CG8892	3715.63	-0.424407	0.103075	-4.11747	3.83056e-05	0.00033299
4859	Zwilch	3517.05	-0.511463	0.124216	-4.11752	3.82966e-05	0.00033299
3753	CG4538	6406.17	0.385991	0.0937558	4.11698	3.83869e-05	0.00033347
14066	CG14967	9582.05	-0.353389	0.0858623	-4.11576	3.859e-05	0.000335034
6663	Pfk	12005.5	0.489011	0.118934	4.11163	3.92882e-05	0.000340686
526	RpI135	10968.7	-0.384221	0.0934505	-4.11149	3.93118e-05	0.000340687
4253	RabX4	1230.08	0.615466	0.149771	4.10937	3.96746e-05	0.000343625
7648	sinu	2226.91	-0.46078	0.112271	-4.10418	4.05744e-05	0.000350369
5362	PIG-A	835.024	-0.621449	0.151439	-4.10363	4.06715e-05	0.000350998
3601	WRNexo	1701.99	-0.551409	0.13449	-4.10001	4.1313e-05	0.000356322
6538	sprt	1167.38	-0.568083	0.138573	-4.09952	4.14016e-05	0.000356873
5661	ATPsyndelta	7232.67	0.451639	0.110181	4.09908	4.14796e-05	0.000357119
7753	CG8478	6319.87	-0.396272	0.0966716	-4.09916	4.1466e-05	0.000357119
13855	Iml1	12354.3	-0.482746	0.117827	-4.09707	4.18409e-05	0.000360016
16577	G6P	1493.51	0.535173	0.130679	4.09533	4.21563e-05	0.000362299
6121	dup	9850.59	-0.513082	0.125343	-4.09343	4.25039e-05	0.00036507
10045	mtRNApol	6657.56	-0.367208	0.0897294	-4.0924	4.26937e-05	0.000366481
2967	Jupiter	4734.67	0.460971	0.112779	4.08738	4.36282e-05	0.000373616
16541	SerRS	13865	-0.458715	0.112283	-4.08535	4.40102e-05	0.000376404
7647	vn	3692.25	0.667184	0.163459	4.08165	4.47174e-05	0.000382039
1235	Rca1	4046.21	-0.44207	0.108322	-4.08107	4.48285e-05	0.000382763
8338	CG33969	3767.4	-0.442635	0.108593	-4.07608	4.58007e-05	0.000389225
5751	MFS16	2506.1	-0.446652	0.109589	-4.07571	4.58749e-05	0.000389627
14258	CG1737	8275.42	-0.394429	0.096895	-4.07069	4.68748e-05	0.000397885
648	fng	1520.18	-0.580387	0.142595	-4.07017	4.69793e-05	0.000398539
9211	mib2	9376.78	-0.396077	0.0973738	-4.06759	4.75018e-05	0.000402499
5938	CG8950	2395.17	-0.49673	0.122268	-4.06265	4.85196e-05	0.000410402
12925	mamo	8189.32	0.619598	0.152543	4.06179	4.86974e-05	0.000411665
12530	CTPsyn	10213.6	0.413637	0.101867	4.06054	4.89587e-05	0.000413632
11153	mib1	6149.78	-0.360068	0.088693	-4.05971	4.91338e-05	0.000414386
7754	CG8481	3032.41	-0.409226	0.100802	-4.05971	4.91338e-05	0.000414386
3594	eIF1A	26588.6	0.322408	0.0794886	4.05603	4.99143e-05	0.000420233
13212	CG45782	413.592	-1.13087	0.278916	-4.05452	5.02377e-05	0.000422709
4215	CG13625	2503.79	-0.441082	0.108828	-4.05301	5.05637e-05	0.000424958
10010	Msp300	301509	-0.35957	0.0887361	-4.05213	5.07539e-05	0.000426062
3397	Akt1	13914.3	0.422461	0.104274	4.05144	5.09042e-05	0.000427076
5291	CG10916	2210.71	-0.472608	0.116671	-4.05076	5.10519e-05	0.000428067
14761	par-6	5988.2	-0.410306	0.101326	-4.04939	5.13517e-05	0.000430331
14637	Graf	5274.98	-0.386186	0.0954239	-4.04706	5.18656e-05	0.000434386
2660	CCT7	13279.2	0.398209	0.0984112	4.04638	5.20167e-05	0.000435399
8276	RpL13	93832.8	-0.339888	0.0840066	-4.04597	5.21071e-05	0.000435903
9441	CG42324	4433.33	0.38037	0.0940449	4.04456	5.24225e-05	0.000438289
15881	CG3408	6332.22	0.481375	0.119039	4.04386	5.25783e-05	0.000439337
13712	Vha13	5511.68	0.562392	0.139139	4.04194	5.30115e-05	0.000441935
1897	p38b	4647.92	0.436445	0.107977	4.04204	5.29884e-05	0.000441935
4126	Pli	4438.67	0.406283	0.100621	4.03778	5.39604e-05	0.000449328
32	CG18273	14790.6	-0.385253	0.0954353	-4.0368	5.41855e-05	0.00045071
15097	RpL26	76870.3	-0.333585	0.0826689	-4.0352	5.45567e-05	0.00045299
4612	Pkc98E	5160.27	0.541517	0.134275	4.0329	5.50919e-05	0.000456909
327	cib	11864.2	0.34693	0.0860232	4.03298	5.50737e-05	0.000456909
9394	Clbn	7562.78	-0.467674	0.115994	-4.03187	5.53345e-05	0.000458658
3920	mRpL35	1430.5	0.516851	0.128242	4.03029	5.57083e-05	0.000461492
15781	Irbp18	1399.03	-0.677006	0.168049	-4.02862	5.61042e-05	0.000464506
14918	dome	3434.56	0.593207	0.147295	4.02734	5.64104e-05	0.000466773
4394	E(spl)mdelta-HLH	115.914	-1.7168	0.426528	-4.02505	5.69629e-05	0.000470807
3072	Dtg	6901.8	-0.483131	0.120041	-4.02471	5.70448e-05	0.000471214
4698	Vps13B	18490.2	-0.313605	0.0779536	-4.02297	5.74694e-05	0.00047445
1347	Rack1	178810	-0.347159	0.0863259	-4.0215	5.78296e-05	0.000476608
9748	MCPH1	5392.03	-0.363041	0.0902908	-4.02079	5.80033e-05	0.000477666
10662	CG3520	2531.69	-0.456121	0.113443	-4.02071	5.8024e-05	0.000477666
1493	Trx-2	7650.91	0.399367	0.0993409	4.02017	5.81561e-05	0.000478482
7250	CG6695	14213.8	-0.364165	0.0906049	-4.01927	5.83796e-05	0.000480047
14553	CG12608	2481.65	0.423538	0.105512	4.01412	5.96667e-05	0.000489796
10653	eIF2Bdelta	5319.89	-0.384271	0.095785	-4.01181	6.02548e-05	0.000494342
1559	Ror	5185.74	0.381633	0.0951326	4.0116	6.03096e-05	0.000494511
7244	Nup154	15892.4	-0.368407	0.0918773	-4.00977	6.07779e-05	0.000497787
3875	CG16791	15383.8	0.462701	0.115415	4.00902	6.09722e-05	0.000499096
14132	VhaM9.7-a	1307.79	0.63874	0.159379	4.00768	6.13181e-05	0.000501643
16180	Vps8	3569.98	-0.41493	0.103589	-4.00553	6.18788e-05	0.000505087
1866	CG16972	5194.39	-0.399318	0.0997796	-4.002	6.28095e-05	0.000512107
10665	CG13551	7046.48	0.391855	0.0980311	3.99725	6.40833e-05	0.000521316
15219	Cad74A	3072.17	0.510832	0.127812	3.99674	6.42208e-05	0.000521848
10114	IntS3	14538	-0.345809	0.0865479	-3.99557	6.45383e-05	0.000524133
6207	CG18324	1324.77	0.524881	0.131385	3.99499	6.46971e-05	0.00052493
4687	Drice	3518.13	-0.418	0.104632	-3.99495	6.47089e-05	0.00052493
11808	Vha68-1	11215.4	0.81309	0.203584	3.99387	6.50029e-05	0.000527019
14065	RpL28	85240.4	-0.356505	0.0893045	-3.99202	6.55127e-05	0.000530855
16426	morgue	2853.02	-0.410192	0.102807	-3.98992	6.6095e-05	0.000535274
7719	Stat92E	7316.85	-0.346006	0.0867264	-3.98962	6.61789e-05	0.000535653
10538	VepD	704.717	-0.714937	0.179302	-3.98734	6.68188e-05	0.000540227
14359	Usp7	28636.9	-0.308739	0.0774389	-3.98687	6.69511e-05	0.000540995
5691	X11Lbeta	4106.29	0.779828	0.19574	3.98399	6.7767e-05	0.000546977
9773	wol	1948.87	-0.468144	0.117607	-3.98057	6.87514e-05	0.000553686
4675	Naa40	2036.4	0.445253	0.111874	3.97995	6.89304e-05	0.000554818
541	Ptth	1128.26	-0.755492	0.189858	-3.97925	6.91337e-05	0.000555855
16023	CG13671	2014.71	-0.4994	0.125568	-3.97711	6.97579e-05	0.000560543
5908	CG6805	1071.73	-0.542702	0.136499	-3.97586	7.01259e-05	0.000562875
10031	whd	4591.19	0.423815	0.106724	3.97114	7.15286e-05	0.000573498
10277	AGO1	70239.8	0.402551	0.101374	3.97095	7.15879e-05	0.000573655
5240	SP2637	2386.55	-0.493267	0.124239	-3.9703	7.17825e-05	0.000574843
6049	CysRS	3084.02	0.52317	0.13189	3.96673	7.28664e-05	0.000582931
16069	Pdp1	6656.97	0.534227	0.134751	3.96455	7.35357e-05	0.000587794
3673	ATPsynD	8506.54	0.500142	0.126175	3.96386	7.3747e-05	0.000588674
2063	PRL-1	12696.3	0.327412	0.082624	3.96268	7.4113e-05	0.000590943
3400	IKKbeta	2268.14	-0.51388	0.129677	-3.96275	7.40905e-05	0.000590943
1326	baf	10210.1	-0.367654	0.0928298	-3.96052	7.47881e-05	0.000595997
4003	Dcr-1	9554.8	-0.3331	0.0841223	-3.95971	7.50405e-05	0.000597679
16267	Eaf6	928.711	-0.572823	0.144673	-3.95943	7.51285e-05	0.000598051
4498	CG6066	1578.21	-0.644881	0.162982	-3.95677	7.59714e-05	0.000604096
8613	Set1	17603.5	-0.358143	0.0905491	-3.95523	7.64597e-05	0.000606577
7303	l(1)G0007	12855.8	-0.355706	0.0899465	-3.95464	7.665e-05	0.000607155
6079	Gpo-1	3057.02	0.811186	0.205169	3.95374	7.69394e-05	0.000609091
6505	wal	4117.08	0.380905	0.0963606	3.95292	7.72047e-05	0.000610546
5738	insc	10795.2	-0.415928	0.105229	-3.95261	7.73035e-05	0.000610993
15678	viaf	3543.87	-0.413228	0.104582	-3.95125	7.77429e-05	0.00061346
3105	Paip2	2737.95	0.486922	0.123247	3.95077	7.78991e-05	0.000614023
9900	CG42673	1270.62	-0.585615	0.148267	-3.94973	7.824e-05	0.000616375
12336	pre-mod(mdg4)-B	7228.3	-0.413086	0.104603	-3.94907	7.84542e-05	0.000617725
8393	CG3838	2777.84	0.478383	0.121169	3.94806	7.87886e-05	0.000619642
255	CG2685	3089.53	-0.404983	0.102633	-3.94592	7.94954e-05	0.000624224
655	CG11399	8395.69	-0.373445	0.0947556	-3.94113	8.10972e-05	0.000635423
2679	skap	13409	0.35231	0.0894626	3.93806	8.21417e-05	0.000642215
14759	ND-24	3709.43	0.464198	0.117907	3.93698	8.2512e-05	0.000644762
10939	rno	19553.2	-0.32344	0.08222	-3.93384	8.36008e-05	0.000652565
14991	kto	16661.5	-0.32276	0.0821074	-3.93095	8.46099e-05	0.000660085
9333	AGO3	3931.36	-0.533982	0.135882	-3.92976	8.50316e-05	0.000662303
2331	nesd	2775.53	-0.41931	0.106719	-3.92911	8.52599e-05	0.000663385
5591	CG32706	458.326	-0.784701	0.199715	-3.92911	8.52622e-05	0.000663385
2393	Nhe2	14192.9	0.399217	0.101627	3.92827	8.55591e-05	0.000665337
5188	RpL11	95085.5	-0.307063	0.0781731	-3.92799	8.5659e-05	0.000665756
5091	Hsl	3094.79	0.405062	0.103176	3.92592	8.63996e-05	0.000671152
13769	Ttd14	6741.57	0.596135	0.151865	3.92542	8.6579e-05	0.000672184
10115	l(2)41Ab	741.861	-0.788933	0.201	-3.92504	8.67159e-05	0.000672886
10217	cic	13406.1	0.329469	0.0840551	3.91968	8.86658e-05	0.000686543
9369	ttm50	3505.69	-0.384028	0.0980317	-3.91739	8.95133e-05	0.000692735
8151	His2B:CG17949	7380.23	-0.592237	0.151198	-3.91696	8.96719e-05	0.00069359
7065	RpS3A	135665	-0.336857	0.0861367	-3.91073	9.20183e-05	0.000710599
1619	Rsf1	6358.25	0.46516	0.11907	3.9066	9.36033e-05	0.000721683
5778	CG30389	11545.4	-0.321666	0.0824242	-3.90257	9.5178e-05	0.000733043
14588	CG9213	2211.76	-0.475523	0.121929	-3.90001	9.61873e-05	0.000740028
10704	sigmar	3002.07	-0.390159	0.100062	-3.89916	9.65273e-05	0.000742247
489	dx	2683.94	-0.409104	0.104967	-3.89747	9.72043e-05	0.000745869
9280	Pcmt	2217.11	-0.464982	0.11937	-3.89529	9.80811e-05	0.000752198
3187	omd	5142.5	-0.429418	0.110285	-3.89373	9.87159e-05	0.000756665
16138	tow	3487.76	0.43328	0.111311	3.89251	9.92137e-05	0.000760078
6534	CG13204	782.229	-0.714985	0.183765	-3.89076	9.99296e-05	0.000765157
1604	CG33303	8369.29	-0.365875	0.094041	-3.89059	0.000100001	0.000765295
3401	CG10407	590.329	-0.807821	0.207677	-3.88979	0.000100331	0.000767364
4493	CG18766	4492.73	0.357168	0.0918354	3.88922	0.000100567	0.000768347
14392	CG32649	1931.07	-0.467588	0.12023	-3.88911	0.000100612	0.000768347
15233	Fit2	1579.27	-0.468591	0.12051	-3.8884	0.000100909	0.000770211
5063	CG9945	4175.83	-0.444015	0.114217	-3.88747	0.000101295	0.000772339
5571	CG12123	1013.83	-0.573792	0.147636	-3.88653	0.000101686	0.000774913
5689	CG2124	891.359	0.652407	0.167908	3.8855	0.00010212	0.000777402
7790	coil	1839.35	0.449323	0.115663	3.88476	0.000102432	0.000779367
2969	CG6790	1914.72	0.682639	0.175745	3.88426	0.000102643	0.000780561
6359	fra	13708.4	-0.338557	0.0872428	-3.88063	0.000104185	0.000790624
10715	RabX1	1335.17	0.495117	0.12764	3.87902	0.00010488	0.000795064
1114	CG7239	4449.78	-0.431611	0.111265	-3.87913	0.000104831	0.000795064
12498	CG45050	30316.1	0.38089	0.0982376	3.87723	0.000105652	0.000800499
4252	CG31357	3180.84	0.3851	0.0993683	3.87548	0.000106413	0.000805541
2510	Taf1	14099.4	-0.326546	0.0842787	-3.8746	0.000106801	0.000807514
4749	janA	3500.54	-0.451541	0.116577	-3.87332	0.000107361	0.000810895
11562	koko	2147.38	0.558806	0.144337	3.87155	0.000108147	0.000815604
5029	CG15236	3895.33	0.38762	0.100133	3.87106	0.000108362	0.000816324
12187	coro	9543.86	-0.319775	0.0826042	-3.87117	0.000108314	0.000816324
3283	Nup93-2	8315.1	-0.469273	0.121313	-3.86829	0.000109603	0.000825244
6249	shot	203714	0.366706	0.0948552	3.86596	0.000110653	0.000832722
10994	CG17129	572.294	0.680908	0.17636	3.86089	0.000112976	0.000848878
9561	CG42445	551.736	0.797065	0.206485	3.86015	0.000113316	0.000850987
4553	CG4849	8308.64	-0.351764	0.0911498	-3.85918	0.000113767	0.000853634
9736	rempA	15219.6	-0.526979	0.13658	-3.8584	0.00011413	0.000855766
14458	CG11151	1830.19	0.452207	0.117352	3.85343	0.000116474	0.000872436
4674	Kul	1792.52	0.637564	0.165558	3.85101	0.000117634	0.000880673
16529	CG17265	4933.55	0.41046	0.106628	3.84946	0.000118381	0.000885803
550	crq	4713.21	-0.38223	0.0993522	-3.84722	0.000119466	0.000892078
11267	nonC	19114.3	-0.302478	0.0787204	-3.84243	0.000121823	0.000908271
5192	cer	1148.97	0.510704	0.133066	3.83798	0.000124048	0.000923435
16543	Sf3b2	12022.5	-0.395877	0.10316	-3.83749	0.000124298	0.000924815
10784	shu	2480.18	-0.412344	0.107549	-3.834	0.000126074	0.000936586
5808	CG18870	1686.28	-0.457306	0.119284	-3.83375	0.000126206	0.000937089
5444	CG9650	512.738	-1.084	0.282808	-3.83299	0.000126597	0.000939506
835	Arf79F	18629.7	0.354323	0.0924911	3.83088	0.000127685	0.000945972
11471	Glg1	7875.03	-0.353745	0.0923484	-3.83054	0.000127861	0.000945972
1239	SA	7214.41	-0.384207	0.100335	-3.82925	0.000128533	0.000949976
14865	CG18259	5197.33	-0.407852	0.106521	-3.82886	0.000128739	0.000951008
1611	Cdk5alpha	2156.76	0.591659	0.154549	3.8283	0.00012903	0.000952676
4445	CG6425	1354.76	-0.500057	0.130631	-3.82801	0.000129182	0.000953307
16534	CG17260	878.111	-0.565691	0.147832	-3.82658	0.000129938	0.000957909
14038	gry	6068.09	-0.356082	0.0930944	-3.82496	0.000130793	0.000963237
10273	eIF4H1	20262.6	0.380682	0.0995321	3.82472	0.000130921	0.00096329
727	Pc	6803.73	-0.501584	0.131145	-3.82464	0.000130963	0.00096329
14544	rut	7817.15	0.450702	0.117906	3.82254	0.000132083	0.000970266
8415	Adar	15016.4	0.326058	0.0853258	3.82133	0.000132735	0.000974558
3019	GstD3	1754.17	0.594463	0.155707	3.81782	0.000134636	0.00098801
4624	Rpn2	13692.7	-0.370188	0.0970191	-3.81562	0.000135844	0.000996372
6762	CG8078	7103.27	-0.627492	0.164556	-3.81323	0.00013716	0.00100501
9976	fwe	13638.5	0.358983	0.0941486	3.81294	0.000137323	0.00100518
11032	CG31688	5098.38	0.443487	0.116401	3.80998	0.000138979	0.00101628
6559	Fbl6	5379.61	-0.352281	0.0924658	-3.80985	0.00013905	0.00101628
6484	GalT1	2665.48	0.4601	0.120786	3.80921	0.000139409	0.00101839
3083	Men	9667.44	0.56264	0.147732	3.80853	0.000139797	0.00102019
14954	CG14232	1897.54	-0.450496	0.118294	-3.80826	0.000139946	0.00102025
633	Ide	8240.5	-0.396316	0.104077	-3.80792	0.000140141	0.00102116
9224	Ubi-p5E	27830.9	0.350755	0.0921561	3.8061	0.000141178	0.0010282
4107	CG5854	1529.23	0.507244	0.133285	3.8057	0.000141403	0.0010288
14948	Nup205	21248.4	-0.330776	0.0869422	-3.80455	0.000142063	0.00103256
1539	CG4901	5403.05	-0.43694	0.114934	-3.80165	0.000143735	0.00104366
14820	HisRS	14949.3	0.377183	0.0992271	3.80121	0.000143991	0.00104469
15650	thoc6	2861.48	-0.451511	0.118807	-3.80037	0.000144481	0.0010475
13636	vib	7212.89	0.394372	0.103806	3.79914	0.000145198	0.00105218
6725	Non1	164034	-0.674025	0.177474	-3.79787	0.000145944	0.00105652
8972	CG34310	1808.02	0.447696	0.117954	3.79552	0.000147335	0.00106569
5613	c12.2	3788.75	-0.395251	0.104137	-3.79548	0.000147358	0.00106569
3046	MBD-R2	10247.5	-0.365292	0.0963047	-3.79308	0.000148787	0.00107496
10556	T3dh	574.851	0.681494	0.179741	3.79152	0.000149726	0.00108012
3491	cal1	10432.9	-0.381066	0.10052	-3.79093	0.000150086	0.00108218
2181	Atac2	3728.2	-0.464545	0.122638	-3.78793	0.000151905	0.0010942
2534	Zif	4275.04	-0.384433	0.101519	-3.78682	0.000152587	0.00109802
7755	trx	50655	-0.336729	0.0889563	-3.78533	0.000153503	0.00110406
14425	comt	12470.7	0.610173	0.161208	3.785	0.000153711	0.00110501
273	CG12535	15977.3	0.697223	0.184279	3.78352	0.000154626	0.00111048
7168	CG8765	2721.44	-0.397324	0.105031	-3.78294	0.00015499	0.00111254
5310	olf186-F	4869.98	-0.392601	0.103802	-3.78222	0.000155434	0.00111517
24	ase	12762.2	0.33821	0.0894985	3.77895	0.000157494	0.00112939
4646	dgt6	3006.53	-0.390655	0.103399	-3.77811	0.000158022	0.00113262
492	PpV	4543.8	0.373816	0.0990356	3.77456	0.000160289	0.0011483
16285	lama	1050.65	0.526504	0.13951	3.77395	0.000160683	0.00114998
4345	CG10420	902.407	-0.557676	0.147767	-3.77403	0.000160633	0.00114998
8436	SkpA	7967.33	0.324604	0.0860282	3.77323	0.000161147	0.00115273
9323	CG42232	105701	-0.331555	0.0878906	-3.77236	0.000161711	0.00115619
326	brn	822.813	-0.562736	0.149283	-3.76959	0.000163513	0.00116678
6985	CG11125	918.6	0.589799	0.156477	3.76924	0.000163746	0.00116786
2971	COX5A	9323.14	0.467904	0.124207	3.76712	0.000165138	0.00117721
16262	Myt1	1437.92	-0.467782	0.124323	-3.76264	0.000168126	0.00119615
15398	CG7656	4354.67	-0.376057	0.0999629	-3.76196	0.000168585	0.00119883
13920	nSyb	12775.4	0.709952	0.18884	3.75955	0.000170219	0.00120985
15301	TMS1	8113.44	0.404606	0.107659	3.75824	0.000171114	0.00121502
15523	Liprin-beta	3984.4	-0.373643	0.09949	-3.75558	0.000172939	0.00122317
15459	CG9384	7772.16	-0.3508	0.0934215	-3.75503	0.000173321	0.00122528
14795	Mvb12	1784.54	0.454454	0.121093	3.75293	0.000174776	0.00123496
7192	sol	13202.2	0.328462	0.0875757	3.75061	0.000176408	0.00124406
15522	Tgi	2368.39	-0.440229	0.11741	-3.74949	0.000177193	0.00124899
14176	CG11357	7026.79	-0.496991	0.132587	-3.7484	0.000177964	0.00125381
5400	CG14438	42713.2	-0.29602	0.0790451	-3.74494	0.000180435	0.00126936
10693	angel	1802.6	0.452381	0.120811	3.74454	0.000180724	0.00127078
3729	Ask1	5210.31	-0.334289	0.0893207	-3.74257	0.000182151	0.00127957
3803	TFAM	3942.35	0.360541	0.0964241	3.73911	0.00018467	0.00129663
608	CG32425	5326.16	0.384348	0.102808	3.73852	0.00018511	0.0012991
3333	CG6276	1384.06	-0.501893	0.134279	-3.73768	0.000185725	0.00130278
1401	Acer	1717.94	0.45192	0.120932	3.73697	0.000186251	0.00130583
7810	lig	36000.6	0.399438	0.106913	3.7361	0.000186894	0.00130971
14661	kat80	2164.89	0.416426	0.111483	3.73533	0.000187471	0.00131306
6088	GalNAc-T1	2018.92	-0.434656	0.116367	-3.73522	0.000187553	0.00131306
8355	Sirup	1649.82	0.484279	0.129673	3.73462	0.000188	0.00131554
11592	AP-2alpha	14760.2	0.430578	0.115444	3.72976	0.000191664	0.00133924
16540	toc	16201.3	0.322084	0.0864933	3.7238	0.000196248	0.00136581
14477	Ndc80	5568.63	-0.351413	0.0943719	-3.72371	0.000196317	0.00136581
16362	CG1812	3417.8	-0.443267	0.119072	-3.72268	0.000197121	0.00137009
1584	RfC3	1870.15	0.512832	0.137772	3.72233	0.000197393	0.00137132
14650	CG32579	1999.08	-0.414975	0.111692	-3.71533	0.000202935	0.0014078
14082	Eip63E	13087.6	-0.302787	0.0815137	-3.71455	0.000203563	0.00141147
8237	RpL14	96741.6	-0.350907	0.0944964	-3.71344	0.000204458	0.00141632
10271	mbf1	8661.42	-0.496586	0.133743	-3.71297	0.000204838	0.00141827
3325	CG14868	1009.85	0.604587	0.162847	3.71261	0.000205135	0.00141965
10992	ebd1	2030.36	0.428502	0.115432	3.71217	0.000205488	0.00142142
5479	spidey	5061.63	0.333562	0.0898642	3.71185	0.000205753	0.00142256
4354	CG5079	18596.4	-1.82419	0.491482	-3.7116	0.00020595	0.00142325
3120	CG8031	676.687	0.703969	0.189679	3.71137	0.00020614	0.00142388
4296	dan	3052.2	0.451271	0.121625	3.71035	0.000206969	0.0014262
3591	14-3-3epsilon	53123.8	0.343941	0.0926967	3.71039	0.00020694	0.0014262
9711	mxc	11258.9	-0.318896	0.0859858	-3.7087	0.000208323	0.00143348
11319	Det	1847.11	-0.470494	0.126896	-3.7077	0.000209153	0.00143851
14461	Nup93-1	12824	-0.364478	0.0983113	-3.70738	0.000209414	0.00143962
16363	Tak1	6465.37	0.326297	0.088075	3.70476	0.000211588	0.00145319
5913	fat-spondin	1417.8	-0.633198	0.170973	-3.7035	0.000212648	0.00145908
124	inc	6261.97	0.383849	0.103653	3.70319	0.000212902	0.00145964
4647	yem	5319.43	-0.367596	0.0992656	-3.70316	0.000212932	0.00145964
10133	ana1	13332.1	-0.318621	0.0860733	-3.70173	0.000214131	0.00146717
6284	mars	15771.3	-0.401622	0.108591	-3.69849	0.000216885	0.00148463
15475	Mpcp2	35721.9	0.310653	0.0840022	3.69815	0.000217178	0.00148593
14091	sty	25609.9	0.532929	0.144236	3.69484	0.000220025	0.0015047
7534	Rab10	3560	0.379714	0.102795	3.69389	0.000220846	0.0015096
4162	eIF4EHP	12228.1	0.45539	0.123289	3.69367	0.000221037	0.00150962
5205	CG15107	2419.75	-0.438142	0.11862	-3.69365	0.000221057	0.00150962
1166	CG9107	2297.46	-0.436341	0.11822	-3.69094	0.000223428	0.00152365
14257	CG11752	1760.25	0.499706	0.135463	3.68887	0.000225253	0.00153465
15694	Pi3K68D	10386.1	-0.302542	0.0820275	-3.6883	0.000225755	0.00153723
2769	CG16790	418.696	0.832619	0.225894	3.68588	0.000227915	0.00155059
15575	mRpL20	1081.42	0.526901	0.142973	3.68531	0.000228428	0.00155262
13194	Yeti	13235.9	0.338819	0.091974	3.68385	0.000229734	0.00156003
14137	Hexo1	5854.16	0.398982	0.108413	3.6802	0.000233047	0.00158104
3669	Mpc1	853.533	0.608305	0.165413	3.6775	0.000235533	0.00159492
8250	AlaRS	15571.7	-0.438681	0.119299	-3.67716	0.000235844	0.00159628
4131	CG5991	2970.98	0.419102	0.114012	3.67596	0.000236952	0.00160303
3253	His4r	31463.7	0.40403	0.109959	3.67435	0.000238451	0.00161166
15135	mus304	1749.41	-0.440807	0.120097	-3.67041	0.000242162	0.00163445
6299	cbc	1560.17	-0.506016	0.137923	-3.66884	0.000243655	0.00164376
15098	CG6843	1516.94	-0.516819	0.140918	-3.66751	0.000244924	0.00165155
239	sgg	10927.5	0.451106	0.123006	3.66734	0.000245083	0.00165186
1741	Ada1-2	1551.32	-0.459846	0.125402	-3.66698	0.000245434	0.00165345
10247	dati	27643.6	0.455151	0.124146	3.66625	0.000246132	0.00165661
14304	CG1572	720.431	-1.14198	0.311477	-3.66634	0.000246043	0.00165661
15772	wls	4544.98	-0.371434	0.101318	-3.66602	0.000246355	0.00165734
1919	tam	4983.28	-0.343222	0.0936447	-3.66515	0.000247194	0.00166144
13560	da	13506.1	-0.361556	0.0986628	-3.66456	0.000247762	0.00166448
4862	CG1607	50717.7	0.374641	0.102273	3.66316	0.000249118	0.00167204
2595	CD98hc	34976	0.497522	0.135845	3.66242	0.000249845	0.00167459
10724	ken	5509.64	-0.544056	0.148548	-3.66249	0.000249778	0.00167459
16578	Syt1	31020.1	0.6605	0.180401	3.66129	0.000250946	0.00168119
15099	CG6841	6765.07	-0.372418	0.101731	-3.66082	0.000251408	0.0016835
6988	az2	3559.04	-0.455164	0.124425	-3.65815	0.00025404	0.00169955
3261	CG7987	14042.3	-0.308696	0.0843904	-3.65794	0.000254246	0.00170015
8445	CG10462	7620.87	-0.678597	0.185553	-3.65717	0.000255017	0.00170451
1677	ATPsynG	9085.95	0.380219	0.104004	3.6558	0.000256385	0.00171207
10711	pita	8699.47	-0.327148	0.0894927	-3.65558	0.000256598	0.00171271
9895	rdgA	4794.66	0.369212	0.101018	3.65491	0.000257268	0.0017158
16258	kri	2198.65	0.395355	0.108215	3.65343	0.000258758	0.00172474
16370	Syx16	2447.96	-0.419913	0.11511	-3.64793	0.000264364	0.00175967
330	GlcAT-I	1603.9	-0.432795	0.118742	-3.64483	0.000267568	0.00178018
9986	kcc	13780.7	0.609607	0.167456	3.6404	0.000272218	0.00180696
11690	koi	14654.2	-0.419424	0.115318	-3.63711	0.000275718	0.00182767
2201	CG10600	6053.93	-0.320349	0.0881114	-3.63573	0.000277193	0.00183661
2182	CG10413	5387.84	-0.322806	0.0888326	-3.63387	0.0002792	0.00184906
10971	Gr61a	1027.35	0.583217	0.16053	3.63306	0.000280078	0.00185403
2685	CG11982	4139.25	-0.421271	0.115959	-3.63293	0.000280218	0.00185411
4868	rod	22087.5	-0.293769	0.0808726	-3.63249	0.000280695	0.00185641
4725	Nlp	26129.7	0.405757	0.111791	3.62961	0.000283852	0.00187472
14777	CG8289	9053.53	-0.38015	0.104762	-3.62872	0.000284829	0.00188032
5026	Trap1	5339.43	0.38076	0.104948	3.62807	0.000285546	0.00188333
6449	wash	1051.78	-0.539929	0.148975	-3.62428	0.000289765	0.00190767
1583	Klp31E	1706.48	-0.446692	0.123281	-3.62338	0.000290783	0.00191176
2085	mdy	593.415	0.671795	0.185445	3.6226	0.000291651	0.00191573
15648	CG5626	1184.68	-0.506532	0.139835	-3.62235	0.000291936	0.00191674
175	deltaCOP	8683.53	-0.374846	0.103516	-3.62113	0.000293321	0.00192495
2568	CG2698	9384.96	-0.31179	0.0861068	-3.62097	0.000293499	0.00192525
7358	ND-MLRQ	5869.27	0.418765	0.115669	3.62038	0.000294173	0.00192879
1387	CG17294	774.777	-0.555073	0.153362	-3.61936	0.000295338	0.00193555
9256	spin	6944.34	-0.311462	0.0860636	-3.61897	0.000295774	0.00193753
16011	ldbr	1764.52	-0.415198	0.114741	-3.61858	0.000296223	0.0019396
799	Rich	5000	-0.332431	0.0919339	-3.61598	0.000299217	0.00195771
234	boi	1503.95	-0.485222	0.13419	-3.61594	0.000299259	0.00195771
7386	CG31687	4443.97	0.335138	0.0926919	3.61561	0.000299643	0.00195933
4729	Sry-delta	2913.08	-0.388226	0.107413	-3.61432	0.000301137	0.00196821
9278	cbs	2185.39	-0.401105	0.110996	-3.61371	0.000301852	0.00197199
3649	CG7705	3174.84	-0.413394	0.114499	-3.61047	0.000305637	0.00199492
15677	Grip163	3978.59	-0.354883	0.0983096	-3.60985	0.00030637	0.00199765
5845	CG30403	1762.36	0.615749	0.170593	3.60946	0.000306834	0.00199912
533	MED15	5874.37	-0.36758	0.101896	-3.60739	0.000309292	0.00201241
6243	Ctf4	4293.01	0.359721	0.0997503	3.60621	0.000310703	0.00202069
14479	ben	13515.5	0.326401	0.0905338	3.6053	0.000311793	0.00202686
961	Cerk	7029.95	0.423968	0.117612	3.60481	0.000312385	0.0020298
2766	Kap-alpha3	12764	0.312263	0.0866525	3.60362	0.000313815	0.00203818
16588	insv	3960.63	-0.418237	0.116147	-3.60092	0.000317094	0.00205855
10593	EMC8-9	1886.71	-0.413103	0.114832	-3.59746	0.000321345	0.00208427
15658	CG10907	1764.86	-0.427482	0.118886	-3.59572	0.000323491	0.00209632
9950	Axud1	8612.87	-0.323541	0.0900041	-3.59474	0.000324721	0.00210052
16679	CG17660	3403.21	-0.419069	0.11662	-3.59346	0.000326312	0.00210987
8664	Nipped-B	46073.9	-0.353657	0.0984423	-3.59253	0.000327478	0.00211646
11960	Bx	4025.13	0.469216	0.130698	3.59008	0.000330579	0.00213269
7397	Elp2	2559.69	0.436424	0.121559	3.59021	0.00033041	0.00213269
15092	CG14074	744.337	-0.626294	0.17445	-3.5901	0.000330548	0.00213269
3569	CG7379	5695.04	-0.325202	0.0906188	-3.58868	0.000332359	0.00214322
7760	AcCoAS	16734.4	0.388917	0.108411	3.58744	0.000333941	0.00215246
3174	flfl	30649.8	-0.272932	0.0760831	-3.58728	0.00033414	0.00215278
6325	CG4679	1641.16	0.595429	0.166131	3.5841	0.000338242	0.0021763
3918	GABA-B-R2	4457.11	0.422553	0.117892	3.58424	0.000338067	0.0021763
16603	oaf	6300.79	-0.322266	0.0899356	-3.5833	0.000339282	0.00218009
10274	Vha16-1	40682.2	0.367173	0.102499	3.58221	0.0003407	0.00218823
3878	AP-2sigma	2146.36	0.481458	0.13446	3.58067	0.000342712	0.00219472
10975	Usp10	38061.2	-0.366506	0.102341	-3.58124	0.000341972	0.00219472
15165	CG5567	1211.24	0.495603	0.138591	3.57602	0.000348868	0.00223275
5583	CG1885	694.507	-0.598956	0.167541	-3.57499	0.000350243	0.00224056
402	CG12730	1222.27	0.687009	0.192209	3.57429	0.000351181	0.00224458
5969	Sod2	3987.97	0.402688	0.112659	3.57438	0.000351061	0.00224458
15859	CG8336	2905.69	-0.389271	0.108962	-3.57255	0.000353518	0.00225852
3787	Cdk2	2734.26	0.403223	0.112903	3.57142	0.000355056	0.00226634
15496	DCTN1-p150	5925	-0.313308	0.0877411	-3.57082	0.00035586	0.00227047
14902	car	3124.95	-0.353613	0.0990349	-3.57059	0.000356175	0.00227148
16045	Uba2	22540.3	-0.341335	0.0956377	-3.56904	0.000358289	0.00228396
15600	CG10960	10074.7	0.339845	0.0952923	3.56634	0.000362001	0.00230524
6490	CG13185	81141.5	-0.367903	0.103167	-3.5661	0.000362329	0.00230565
13693	S6k	15355.3	0.346557	0.0972644	3.56304	0.000366584	0.00232964
517	PGAP2	462.754	0.774911	0.217573	3.56161	0.000368584	0.00233927
609	CG18281	777.543	0.634831	0.178325	3.55996	0.000370912	0.00235198
14717	RhoGAP15B	4657.98	-0.440426	0.123731	-3.55954	0.000371503	0.0023547
9816	grp	16674.5	0.309072	0.0868799	3.55747	0.000374448	0.00237129
9722	Ykt6	1978.79	0.429152	0.120761	3.55372	0.000379823	0.00240322
15453	dlp	2178.74	0.436934	0.122998	3.55235	0.000381803	0.00241363
4214	Syx18	2150.05	-0.530202	0.149268	-3.55201	0.000382303	0.00241574
7585	eIF3i	34797.8	-0.310885	0.087529	-3.55179	0.000382613	0.00241664
1640	CG12299	11548.2	0.310076	0.0873244	3.55086	0.000383979	0.00242421
965	CG12173	2086.55	0.547048	0.154161	3.54856	0.00038735	0.0024423
7203	elg1	5469.28	-0.320289	0.0902746	-3.54794	0.000388257	0.00244695
807	CG32452	1322.59	0.54959	0.155008	3.54555	0.000391795	0.00246259
16405	Atet	9187.7	0.301583	0.0850617	3.54546	0.00039193	0.00246259
14883	CG32536	869.569	-0.532793	0.150384	-3.54287	0.000395791	0.00248254
13178	Glut4EF	8729.65	0.411799	0.11627	3.54175	0.000397482	0.00249206
443	PGAP1	2562.31	-0.379102	0.10705	-3.54136	0.000398069	0.00249466
10465	cac	37798.1	-0.404105	0.114137	-3.54052	0.000399335	0.00250094
14769	CG15814	3662.88	-0.369604	0.104407	-3.54003	0.000400086	0.00250404
6576	luna	1366.77	0.507535	0.143377	3.53987	0.000400328	0.00250448
934	CG2931	1169.58	-0.502807	0.142262	-3.53437	0.000408744	0.00255271
3131	Su(var)3-7	11390	-0.336902	0.095357	-3.53306	0.000410781	0.00256322
12655	Svil	22939.7	-0.314363	0.0891589	-3.52588	0.000422083	0.00262807
5364	Snx16	977.152	-0.530593	0.150526	-3.52493	0.000423601	0.00263412
11260	COX8	4283.7	0.58404	0.165779	3.523	0.000426695	0.00264994
16559	Elba2	1581.9	-0.60175	0.170802	-3.52309	0.000426545	0.00264994
9597	vlc	8671.89	-0.317756	0.090258	-3.52053	0.000430685	0.00267128
7132	nxf2	5095.93	-0.337714	0.0959312	-3.52037	0.000430942	0.00267173
1120	CG9044	4738.38	-0.343621	0.0976456	-3.51906	0.000433083	0.00268385
4155	CG5510	3071.22	-0.353112	0.100452	-3.51522	0.000439388	0.00271943
4689	ca	11670.3	-0.313013	0.0890533	-3.51489	0.000439931	0.00272163
16680	RFeSP	7398.97	0.354131	0.100825	3.51235	0.000444156	0.00274431
3343	SIDL	4623.75	-0.341466	0.0972189	-3.51235	0.000444167	0.00274431
405	RhoGAP5A	3244.58	-0.367568	0.10475	-3.50899	0.000449808	0.00277561
16648	tho2	19697.5	-0.29625	0.0844718	-3.50709	0.000453042	0.00279318
9384	DNApol-alpha180	9836.16	-0.28704	0.0818701	-3.50604	0.000454827	0.00280299
4803	aralar1	3980.83	0.379308	0.108205	3.50547	0.000455805	0.00280782
14643	Mfe2	3286.96	-0.349784	0.0998478	-3.50318	0.000459746	0.00283089
1709	Reps	12157.1	-0.288235	0.082294	-3.5025	0.000460913	0.00283567
15194	Edc3	31616.8	-0.40799	0.116544	-3.50074	0.00046396	0.0028532
6953	CG30496	1583.94	-0.430205	0.122942	-3.49926	0.000466556	0.0028655
575	U2af38	6267.43	-0.354658	0.101363	-3.49889	0.000467197	0.00286701
14811	betaCOP	10910	-0.32407	0.0926791	-3.49669	0.000471074	0.00288835
8313	CG3662	16742.6	0.456864	0.130673	3.49624	0.00047187	0.002892
5064	FAM21	2135.76	0.433011	0.123872	3.49565	0.000472915	0.00289718
5225	CG15099	8010.05	0.310843	0.0889292	3.4954	0.000473353	0.00289864
12468	Pde8	5051.34	0.453922	0.129872	3.49515	0.000473787	0.00289884
5597	Bap111	11305	-0.286912	0.0821094	-3.49427	0.000475364	0.00290603
14824	fu	3101.96	-0.380208	0.10884	-3.49328	0.000477134	0.00291482
6863	sut1	656.305	0.607899	0.174057	3.49253	0.000478472	0.00292132
14664	Fur2	9583.74	-0.312929	0.0896353	-3.49114	0.000480969	0.00293533
9255	fne	11535.5	0.538894	0.154423	3.48972	0.000483528	0.0029497
2924	Ranbp9	14125.1	0.378152	0.108456	3.48669	0.000489045	0.00298085
1458	CG13108	1152.42	0.666654	0.191295	3.48495	0.000492235	0.00299903
6592	Taf5	3462.95	-0.33697	0.0966961	-3.48483	0.000492451	0.00299908
2532	TfIIFalpha	4941.76	-0.333381	0.0956718	-3.48463	0.000492822	0.00300008
1075	Ncoa6	16054.3	-0.285106	0.0818384	-3.48377	0.000494402	0.00300716
7243	Nmda1	8851.05	-0.321137	0.0921925	-3.48334	0.000495207	0.00300953
3402	mor	20802.6	-0.278176	0.0798657	-3.48304	0.000495749	0.00301156
15362	CG17032	682.952	0.608586	0.174751	3.48258	0.000496609	0.00301551
14518	ND-B18	1474.16	0.455368	0.130788	3.48173	0.000498177	0.00302377
12342	Vamp7	3710.25	-0.360704	0.103611	-3.48134	0.000498917	0.00302699
13770	trol	18842.6	0.714348	0.205206	3.48112	0.000499323	0.00302818
15248	CG32165	8159.45	-0.313738	0.0902231	-3.47735	0.00050639	0.00306492
13926	CG7879	5019.28	-0.506531	0.145667	-3.47733	0.000506441	0.00306492
5222	Jheh1	1128.89	0.59078	0.169931	3.47658	0.000507855	0.0030722
11050	sqd	63040.1	0.31557	0.0907999	3.47544	0.000510008	0.00308264
15788	CG6321	1234.26	0.68195	0.196245	3.47499	0.000510867	0.00308268
1190	CG9536	2620.22	-0.441567	0.127062	-3.47521	0.000510459	0.00308268
1772	crok	851.401	-0.522484	0.150353	-3.47504	0.000510768	0.00308268
6493	S2P	2417.84	0.388851	0.111979	3.47252	0.000515588	0.00310857
6237	Cp1	18652.7	0.360912	0.10407	3.46796	0.000524426	0.00315791
11793	Trpm	14143.9	-0.397435	0.114627	-3.4672	0.00052591	0.00316421
9776	Vps45	1914.1	-0.402196	0.116018	-3.46666	0.00052697	0.00316664
3209	twf	1226.2	-0.476725	0.13759	-3.46483	0.00053057	0.00318562
9924	RpS26	100416	-0.28964	0.0836021	-3.46451	0.000531202	0.00318809
8345	CG10973	2281.9	-0.436673	0.126108	-3.4627	0.000534779	0.00320292
5519	CG2147	1638.45	0.407966	0.11791	3.45998	0.00054021	0.00323143
354	CG3568	1726.62	0.63278	0.183006	3.4577	0.000544813	0.00325762
2923	Irbp	4653.39	-0.440009	0.127272	-3.45723	0.000545762	0.00326195
13993	CG12182	3470.52	-0.341758	0.0989094	-3.45526	0.00054976	0.00328177
7214	Hrs	3377.29	-0.397306	0.114996	-3.45495	0.000550391	0.00328418
15311	CG4729	3376.89	-0.38256	0.110737	-3.45466	0.000550986	0.00328638
4281	danr	1911.86	0.507824	0.147134	3.45144	0.000557605	0.00331804
10444	CG43340	11436.3	0.282395	0.0818151	3.45162	0.000557232	0.00331804
4869	CG1635	2065.43	-0.388614	0.112592	-3.45152	0.000557447	0.00331804
16123	pst	4751.1	0.396775	0.114966	3.45125	0.000557987	0.00331855
15624	ArfGAP1	5127.18	-0.321728	0.0932414	-3.45048	0.000559587	0.0033267
2299	CG10189	2084.49	-0.44024	0.127691	-3.4477	0.000565387	0.00335566
218	wapl	11571.1	-0.29023	0.0842949	-3.44303	0.000575239	0.00341274
4583	htt	15047.9	-0.313287	0.0910569	-3.44057	0.000580491	0.00343685
14862	CG7280	2537.9	0.379127	0.110205	3.4402	0.000581293	0.00343878
4711	Atg16	2332	-0.367061	0.106695	-3.44028	0.000581108	0.00343878
2990	CG6950	3822.92	0.358134	0.104119	3.43968	0.000582403	0.00344253
8341	porin	36226.5	0.401316	0.116713	3.4385	0.000584952	0.00345478
1022	srl	20230.2	-0.342354	0.0995957	-3.43744	0.000587248	0.00346551
916	CG1236	1375.04	0.508464	0.147987	3.43586	0.000590668	0.00348285
4963	l(2)k14710	4311.45	-0.347344	0.101112	-3.43523	0.000592051	0.00348958
4941	CG17018	11348.6	-0.525953	0.153125	-3.4348	0.000593001	0.00349376
9074	CG34449	13934.9	-0.366361	0.106669	-3.43456	0.000593522	0.00349489
7126	RpS7	120487	0.264766	0.0771494	3.43186	0.000599458	0.00352551
1250	Fgop2	2520.75	-0.356542	0.103894	-3.43179	0.00059961	0.00352551
7606	CG33523	4049.72	-0.323992	0.0944441	-3.43051	0.000602442	0.00353929
13969	oxt	2933.28	-0.361377	0.105353	-3.43016	0.000603216	0.00354239
12407	FeCH	4594.86	-0.388525	0.113273	-3.43	0.000603574	0.00354306
9268	Bre1	9626.66	-0.28241	0.0823925	-3.42762	0.000608903	0.00357289
2245	Swip-1	3282.48	0.381126	0.111209	3.42712	0.000610018	0.00357798
3607	l(3)05822	8753.05	-0.345161	0.100736	-3.42639	0.000611672	0.00358623
14770	CG8142	2401.75	0.398126	0.116225	3.42547	0.000613729	0.00359683
12546	stai	18415.4	0.375698	0.109721	3.42412	0.000616797	0.00361334
9790	Syt14	3757.58	0.499434	0.145926	3.42253	0.000620415	0.00363307
8454	nuf	5001.92	-0.50026	0.146181	-3.42219	0.000621193	0.00363615
5637	RpS28b	86627.4	-0.274348	0.0801776	-3.42175	0.000622192	0.00363905
3136	CG32473	3807.9	-0.369991	0.10817	-3.42047	0.000625132	0.00365182
3379	rec	4087.36	0.39527	0.115581	3.41985	0.000626559	0.00365868
5851	mei-S332	3788.2	-0.374385	0.109542	-3.41774	0.00063144	0.00368421
14290	nod	2938.33	-0.386509	0.113126	-3.41662	0.000634036	0.00369786
3315	CG31301	4361.46	0.362403	0.106269	3.41026	0.000649017	0.0037733
13872	Klp61F	11756.8	-0.336297	0.0986156	-3.41018	0.00064919	0.0037733
1068	cype	6034.22	0.490764	0.143963	3.40896	0.00065211	0.003788
7248	CG5789	10205.4	-0.38347	0.112562	-3.40675	0.000657422	0.00381579
9907	Lmpt	6023.22	-0.615776	0.181018	-3.40173	0.000669611	0.00388031
2849	CG6325	3740.43	-0.331824	0.097552	-3.40151	0.000670153	0.00388189
6487	PI31	4923.27	-0.33292	0.0978881	-3.40103	0.000671331	0.00388716
10600	Ppa	7459.6	0.415675	0.122421	3.39545	0.000685165	0.00395776
5396	Mcm6	13772.6	0.313398	0.0922988	3.39547	0.000685107	0.00395776
3038	Scgbeta	569.677	0.852367	0.251105	3.39447	0.000687623	0.00397037
4569	Moca-cyp	12038.4	-0.295247	0.0870118	-3.39319	0.000690847	0.00398739
2928	CG5281	1432.86	0.437716	0.129042	3.39204	0.000693748	0.00400095
7737	Top1	12349.5	0.317054	0.0934674	3.39214	0.00069349	0.00400095
3629	CG31122	6331	-0.32443	0.0957473	-3.38839	0.000703036	0.00405128
3596	Dlc90F	4600.81	0.353334	0.104326	3.38683	0.000707051	0.00406955
6021	CG30099	227.456	-0.954778	0.281966	-3.38614	0.000708829	0.00407816
7704	CG33111	2918.29	-0.431	0.127315	-3.38532	0.000710951	0.00408712
12506	wake	13157.2	-0.305795	0.0903646	-3.38401	0.000714348	0.00410502
5429	CG8300	3535.3	-0.346641	0.102443	-3.38374	0.000715061	0.00410749
6944	Corin	31256.1	-0.299848	0.0886177	-3.38362	0.000715382	0.0041077
11504	Lst8	4894.84	-0.322362	0.0952754	-3.38348	0.000715731	0.00410807
2553	Prat	3653.74	0.370105	0.109404	3.38291	0.000717224	0.004115
7259	CG9527	1413.59	0.417089	0.123329	3.38192	0.000719805	0.00412817
4525	pll	1038.82	-0.571768	0.169115	-3.38095	0.000722364	0.00414121
3469	CG14907	1178.24	-0.55986	0.165655	-3.37969	0.000725684	0.00415859
11470	garz	10292.6	-0.299104	0.0885238	-3.3788	0.000728035	0.00416876
6822	CG14767	11577.7	0.42469	0.125758	3.37704	0.000732707	0.00419219
9814	Opa1	14461.9	-0.295619	0.087599	-3.37468	0.000739011	0.00422659
16297	Prpk	1116.25	0.504283	0.149558	3.37181	0.000746751	0.00426658
5415	CG3224	2745.62	0.415251	0.123155	3.37176	0.000746887	0.00426658
4650	Slu7	2154.85	-0.450615	0.133721	-3.36982	0.000752181	0.00428894
2361	CG31678	10759	-0.359594	0.106779	-3.36763	0.000758162	0.00432075
4355	CG5071	41071.1	-1.59351	0.473364	-3.36634	0.000761718	0.0043376
14104	mge	3843.74	0.390572	0.116213	3.36084	0.000777062	0.00442149
5066	maf-S	2380.04	0.543104	0.161603	3.36072	0.000777395	0.00442164
10885	CG2811	2824.74	0.429581	0.127837	3.36039	0.000778328	0.00442521
15316	Golgin104	2063.65	-0.408822	0.121759	-3.35763	0.000786125	0.00446252
15493	Tsp68C	125.825	1.17426	0.349764	3.3573	0.000787069	0.00446601
3229	CG12402	836.305	0.725481	0.216222	3.35526	0.000792893	0.00449565
16548	CG9641	2337.94	0.365504	0.108991	3.35352	0.000797909	0.00452232
16655	CG15356	3365.53	-0.427442	0.127465	-3.35341	0.000798229	0.00452236
15940	bol	6820.1	0.520631	0.155294	3.35256	0.000800677	0.00453445
16703	ast	2413.95	-0.368061	0.109915	-3.3486	0.000812218	0.00459801
9738	Vps15	3980.86	-0.339322	0.101342	-3.34828	0.000813155	0.00460127
5326	Mapmodulin	26552.7	0.354063	0.105786	3.34697	0.000816998	0.00461604
6460	CG8858	11295.1	-0.273384	0.0816787	-3.34707	0.000816704	0.00461604
10782	eIF6	7679.46	-0.385734	0.115242	-3.34716	0.000816432	0.00461604
14940	CG12531	7553.75	0.580428	0.17346	3.34619	0.000819314	0.00462732
16560	Arpc5	1886.27	-0.432436	0.129245	-3.34587	0.000820256	0.00462902
1321	CG7115	2955.92	0.33561	0.100412	3.34233	0.000830793	0.00467957
11116	mld	9772.27	0.294862	0.0882199	3.34235	0.000830726	0.00467957
7698	ade3	17601.9	-0.337511	0.101187	-3.3355	0.000851456	0.00479201
8319	CG9008	473.839	0.864246	0.259152	3.3349	0.000853294	0.00479675
14564	Ahcy	11333.7	0.33426	0.100271	3.33358	0.000857352	0.00481769
1828	Edem2	5097.17	-0.306996	0.092129	-3.33224	0.000861503	0.00483726
1921	Adat1	2709.8	-0.458913	0.13775	-3.33149	0.000863813	0.00484647
7038	CG1909	3885.27	0.440828	0.132432	3.3287	0.000872513	0.00488959
1870	DnaJ-H	4616.73	-0.31727	0.0953173	-3.32857	0.000872933	0.00489005
14142	CG15011	2629.23	-0.35253	0.105951	-3.32729	0.000876945	0.00491062
2968	CG6791	16872	-0.391178	0.11759	-3.32664	0.000879012	0.00492029
14094	PIG-B	5736.73	-0.296783	0.0893532	-3.32146	0.000895485	0.00500668
6603	Mat1	2652.02	-0.452809	0.136357	-3.32076	0.000897735	0.00501733
10557	wdp	7000.75	0.334752	0.100814	3.32048	0.000898626	0.00502036
14089	CG14971	1786.46	-0.398646	0.120072	-3.32006	0.000899981	0.00502406
10264	Skeletor	124.658	-1.2685	0.382672	-3.31486	0.000916891	0.00511451
9046	spri	5060.42	0.393451	0.118739	3.31357	0.000921118	0.0051361
16339	CG1532	2007.81	0.415367	0.125361	3.31336	0.000921811	0.00513799
8312	CG9313	517.965	0.820552	0.248035	3.30821	0.00093893	0.00522133
747	eg	480.621	0.866628	0.26227	3.30434	0.000952017	0.00528801
7520	Apf	337.125	0.797254	0.241397	3.30267	0.00095769	0.00531748
4883	CG1815	16382.7	-0.260479	0.0789118	-3.30089	0.000963799	0.00534729
942	mRpL44	2994.84	0.355979	0.107856	3.30051	0.000965088	0.00535034
11431	how	3888.49	-0.385157	0.116747	-3.29908	0.000970036	0.00537571
5446	CG2059	1661.73	-0.429857	0.130303	-3.29891	0.000970615	0.00537686
15095	Ugt	13516.3	-0.289323	0.0877296	-3.29789	0.000974146	0.00539229
4384	CG4743	1148.1	0.444487	0.134811	3.29713	0.000976791	0.00540486
110	CG12773	5003.67	-0.31851	0.0966814	-3.29443	0.000986212	0.00545282
15973	DNApol-alpha50	1426.84	0.424136	0.129048	3.28665	0.00101388	0.00559083
14272	Klp10A	22837.8	-0.257621	0.0783827	-3.28671	0.00101365	0.00559083
15406	Tollo	8149.11	-0.351094	0.106823	-3.28669	0.00101374	0.00559083
3030	CG17202	2338.43	0.367809	0.111949	3.28551	0.00101797	0.00560909
8679	Snap25	12974	0.5112	0.155691	3.28343	0.00102554	0.00564651
6211	Usp20-33	4665.6	-0.339444	0.103391	-3.28312	0.00102663	0.00565039
9991	CG42748	11810.1	0.307396	0.0939079	3.27338	0.00106271	0.0058334
3777	CG5191	1072.16	0.630717	0.192735	3.27247	0.00106614	0.00584779
2749	CG16817	19849.4	0.330505	0.101119	3.26847	0.00108132	0.00592655
947	CG1116	2862.18	-0.34916	0.106872	-3.26709	0.00108659	0.00595092
3598	Nup43	2844.86	-0.399853	0.122501	-3.26408	0.0010982	0.00600541
2052	chif	19966.9	-0.256978	0.0787861	-3.26172	0.00110739	0.00605113
7518	CG4619	2459.18	0.364836	0.111914	3.25996	0.00111429	0.00608649
13639	ap	315.449	-0.726727	0.223023	-3.25853	0.00111993	0.00611037
4111	CG5902	2773.25	0.36348	0.111567	3.25794	0.00112226	0.00612078
8300	Tbp	2970.04	-0.390866	0.120008	-3.257	0.00112595	0.00613632
670	CG10512	18047.1	0.307677	0.0944719	3.2568	0.00112674	0.00613831
891	CG2023	666.351	-0.54173	0.16636	-3.25637	0.00112845	0.00614301
14475	CG2691	14664.7	-0.280832	0.0862853	-3.25469	0.00113518	0.00617488
4946	Tbce	2658.45	-0.338704	0.104112	-3.25327	0.00114083	0.00619872
7312	Fbxl4	2939.76	-0.387231	0.119026	-3.25334	0.00114059	0.00619872
14944	Alr	2461.64	-0.359731	0.110601	-3.25251	0.0011439	0.00621307
13863	CG2199	6031.06	-0.326594	0.100423	-3.25219	0.00114518	0.00621765
1007	tub	4259.14	0.369994	0.113787	3.25165	0.00114736	0.00622719
81	CG3703	3642.41	0.3726	0.114634	3.25035	0.00115261	0.00624395
3932	Idh3b	7022.84	0.348143	0.107099	3.25065	0.0011514	0.00624395
593	eRF1	15012.5	-0.451891	0.139026	-3.25041	0.0011524	0.00624395
6770	Sec31	7620.93	-0.276977	0.085226	-3.24991	0.0011544	0.00624899
16457	CG3407	1472.62	-0.412864	0.127091	-3.24856	0.00115991	0.00627643
14519	dob	246.083	-0.98548	0.30341	-3.24802	0.00116212	0.00628606
2863	CG6574	934.449	0.558017	0.171822	3.24764	0.00116365	0.00628941
14852	CG7101	1327.16	-0.415488	0.127939	-3.24755	0.00116405	0.00628941
2881	Leash	2087.27	-0.355014	0.109348	-3.24664	0.00116776	0.00630713
15998	GstO2	4172.56	0.316176	0.0973973	3.24625	0.00116937	0.00631345
3447	Pak3	7082.5	-0.31091	0.0957796	-3.2461	0.00116998	0.00631442
13858	CG12084	6557.77	-0.283006	0.0872497	-3.24363	0.00118015	0.00636455
7175	CG10383	6537.38	0.432836	0.133458	3.24325	0.00118176	0.00637085
10988	CG13895	3438.24	-0.413474	0.127525	-3.24229	0.00118573	0.00638879
13668	dmt	7401.44	-0.3476	0.107286	-3.23994	0.00119553	0.00643787
16256	Usp47	27569	-0.374605	0.115697	-3.2378	0.00120454	0.00648397
12236	CG44774	28379.3	-0.332788	0.102802	-3.23716	0.00120724	0.00649611
11336	DNApol-epsilon255	11460.5	-0.288502	0.089201	-3.2343	0.00121943	0.00655045
4456	T48	680.694	-0.584374	0.180777	-3.23257	0.00122681	0.0065818
10262	Sap130	9395.74	-0.281035	0.086995	-3.23047	0.00123586	0.00662455
148	mip130	6915.04	-0.283991	0.0879068	-3.23059	0.00123534	0.00662455
14708	goe	4627.92	0.418517	0.129591	3.22952	0.00123998	0.0066426
14406	CG4332	2689.96	-0.33091	0.102526	-3.22757	0.00124846	0.0066831
8305	RpS13	98582.6	-0.253362	0.0785701	-3.22466	0.00126123	0.00674645
14638	CG8944	4351.77	-0.30663	0.095104	-3.22416	0.00126345	0.00675583
9818	SREBP	24143	-0.247227	0.0767378	-3.22171	0.00127429	0.00680372
7636	dpr1	930.867	0.717705	0.222833	3.22082	0.00127826	0.0068224
4919	tsh	21477.4	0.366819	0.11391	3.22025	0.00128079	0.00683338
2252	pigeon	4201.01	-0.304938	0.0946977	-3.22012	0.00128136	0.00683393
15604	Hip1	9637.47	-0.295869	0.0919105	-3.2191	0.00128594	0.00685233
4164	Hsp68	4470.72	-1.48898	0.462556	-3.21903	0.00128623	0.00685233
8038	His1:CG33801	26081.4	-0.571302	0.177502	-3.21857	0.00128832	0.00686093
16640	CG10880	1609.92	0.401358	0.124712	3.21828	0.00128961	0.00686527
4459	CG5521	12944.6	-0.268765	0.0835323	-3.21749	0.00129316	0.00688164
6071	tun	4225.54	0.409079	0.127179	3.21655	0.00129741	0.00689824
1591	loh	432.448	-0.706563	0.219669	-3.21649	0.00129771	0.00689824
9705	Larp7	1761.76	-0.419116	0.130342	-3.21552	0.0013021	0.00691392
13874	pns	7009.12	-0.347515	0.108083	-3.21525	0.00130333	0.00691794
15876	fry	17911.1	-0.306403	0.0953369	-3.21389	0.00130949	0.00694299
10846	CG4707	3965.3	-0.36437	0.113419	-3.2126	0.00131538	0.00697167
4264	Nmnat	1391.62	-0.41251	0.12843	-3.21195	0.00131839	0.00698505
9509	CG42394	820.681	0.826702	0.257664	3.20845	0.00133452	0.00706014
503	dock	5895.94	0.334311	0.104234	3.20732	0.0013398	0.00708528
6362	ClC-b	5659.96	-0.301052	0.0938668	-3.20722	0.00134025	0.00708528
831	Mes2	11235.3	0.377579	0.11779	3.20554	0.0013481	0.0071216
16515	Mad	4874.26	-0.318748	0.0994664	-3.20458	0.00135258	0.00714267
308	CG2875	5011.73	-0.295121	0.0921576	-3.20235	0.0013631	0.0071956
151	CG11596	3174.82	0.335593	0.104816	3.20174	0.00136599	0.00720818
3126	grsm	2997.17	-0.328216	0.102585	-3.19947	0.00137681	0.00726265
1368	CG7627	4798.21	0.367008	0.114721	3.19914	0.00137837	0.00726822
1890	RpL24	94986.6	-0.251275	0.0785708	-3.19807	0.00138349	0.00729255
15899	CG3552	2593.85	0.42084	0.131623	3.19731	0.00138713	0.00730911
704	CG7611	11215.6	0.286796	0.089704	3.19714	0.00138798	0.00731088
16169	SP1173	17763	0.346718	0.108455	3.19687	0.00138927	0.00731506
1066	Bub1	4798.27	-0.331547	0.103729	-3.19627	0.00139217	0.00732765
5516	CG18262	2297.09	-0.341887	0.106973	-3.19601	0.00139342	0.00733155
3826	AdSS	13177.8	0.284338	0.0890054	3.19462	0.00140016	0.00735899
1602	CG5355	8258.2	0.293269	0.091806	3.19444	0.001401	0.00736073
14583	CG9240	2293.47	-0.360217	0.11278	-3.19397	0.00140333	0.00737029
6174	CG10151	2005.12	0.355428	0.111294	3.19361	0.00140508	0.0073768
100	CG11417	7700.93	-0.328254	0.102824	-3.19237	0.00141109	0.00740569
15789	klu	15832.3	-0.270715	0.084845	-3.1907	0.00141927	0.00744047
12900	unc-104	54606.5	0.532189	0.166913	3.18843	0.0014305	0.00748579
15709	CG14135	714.323	0.514018	0.16125	3.1877	0.00143408	0.00750183
10926	mRpL17	1918.45	0.419609	0.131664	3.18698	0.00143765	0.00750964
3278	CG14860	2711.78	-0.435524	0.136647	-3.18723	0.00143645	0.00750964
15004	Tom20	5277.51	0.365489	0.114725	3.18578	0.00144363	0.00753
2246	L2HGDH	1183.97	0.465084	0.146016	3.18516	0.00144676	0.00754358
6251	fand	6733.88	-0.317387	0.0996495	-3.18504	0.00144735	0.00754397
16158	Mis12	1937.29	-0.407417	0.12793	-3.18468	0.00144915	0.00755064
4630	Brd8	4701.33	-0.340419	0.107016	-3.18099	0.00146771	0.00763633
14773	CG8173	4360.11	-0.344617	0.108395	-3.17929	0.00147639	0.00767594
13685	Glo1	2062.69	0.589488	0.185462	3.17848	0.00148048	0.00769448
8632	CG34114	2868.02	0.587478	0.184861	3.17794	0.00148325	0.00770607
5241	CG30122	26620.8	-0.243074	0.0765182	-3.17669	0.00148969	0.00773396
10003	Asx	12045	-0.255448	0.0804119	-3.17674	0.00148941	0.00773396
11524	CG1172	2910.28	-0.337569	0.106297	-3.17571	0.00149471	0.00775651
5195	mip40	3347.85	-0.409019	0.128799	-3.17563	0.0014951	0.00775651
4752	ZIPIC	2131.59	-0.372313	0.117302	-3.17396	0.00150374	0.00779574
8494	mxt	8199.24	0.308688	0.0973349	3.1714	0.00151708	0.00785361
13717	CG46301	124434	-0.250029	0.0788813	-3.16968	0.00152605	0.00789159
1599	TBC1D16	3366.67	0.397299	0.125363	3.16919	0.00152867	0.00789875
6481	CG8298	3736.55	-0.317562	0.100203	-3.16918	0.0015287	0.00789875
471	rux	1485.37	-0.402241	0.126946	-3.1686	0.00153173	0.00790683
433	GAA1	7440.62	-0.270512	0.08539	-3.16796	0.00153514	0.00792162
2360	Cen	4702.65	0.296458	0.0936188	3.16665	0.00154205	0.00795158
2177	CG10333	5905.4	-0.375726	0.11871	-3.16508	0.00155039	0.00799174
14605	CG15602	1149.91	-0.459513	0.145229	-3.16407	0.0015558	0.00801205
4486	grass	258.821	0.857969	0.271314	3.16228	0.00156541	0.00805494
10668	CG3500	1427.8	-0.395733	0.125142	-3.16227	0.00156543	0.00805494
9913	kug	80742.1	-0.261763	0.0827876	-3.16186	0.00156763	0.00806336
5640	LysRS	16330.7	0.295168	0.093371	3.16124	0.001571	0.00807785
5715	ND-B14.7	4156.04	0.334283	0.105755	3.16091	0.0015728	0.0080842
182	Pgd	1856.09	0.398765	0.126172	3.16049	0.00157504	0.00809287
9188	rumi	2244.34	-0.439799	0.139196	-3.15957	0.00158005	0.00811281
6364	Amph	5992.67	0.379866	0.120295	3.15777	0.00158979	0.00815706
5286	Dlip3	3925.37	0.297925	0.0943662	3.15711	0.00159338	0.00816956
14580	CG15601	1332.41	-0.433395	0.13728	-3.15702	0.00159392	0.00816956
4753	RpS28a	32.428	-2.25651	0.714918	-3.15632	0.00159772	0.0081832
10962	mth	969.87	0.462756	0.14662	3.15615	0.00159866	0.00818512
2837	jumu	15493.3	-0.250417	0.0793488	-3.15591	0.00160001	0.00818913
10952	Rev1	2880.23	-0.336646	0.106681	-3.15563	0.00160153	0.00819403
14578	CG8128	1073.88	0.491403	0.155938	3.15126	0.00162566	0.00831162
7631	kel	14659.4	0.262614	0.083436	3.14748	0.00164682	0.00840853
2572	unc-45	1663.09	-0.426496	0.135688	-3.14321	0.00167107	0.00852571
4086	RanBP3	6707.94	-0.31512	0.100284	-3.14227	0.00167646	0.00854796
7105	mia	1237.45	-0.42923	0.1366	-3.14224	0.00167661	0.00854796
8401	Got2	4541.72	0.325324	0.103661	3.13835	0.00169905	0.00864709
1086	Lam	56416.2	-0.290934	0.0927105	-3.13809	0.0017005	0.00865145
10249	Myc	109658	0.484741	0.154543	3.13662	0.00170909	0.00868292
7513	Srp54	10793.5	-0.314683	0.100344	-3.13604	0.00171247	0.00869706
15921	Nf-YA	3018.44	-0.348227	0.111134	-3.13341	0.00172787	0.00877215
210	crn	5556.6	-0.307341	0.098097	-3.13303	0.00173012	0.0087805
15791	hay	2904.91	-0.351092	0.112167	-3.13008	0.00174757	0.00885973
7399	Git	3927.34	-0.301277	0.0962562	-3.12995	0.00174837	0.00886069
5961	ste24a	3635.86	0.387082	0.123733	3.12837	0.00175777	0.00890208
5377	CG14483	1051.01	0.508278	0.162682	3.12437	0.00178187	0.00901783
1622	chico	7808.15	-0.350865	0.112333	-3.12342	0.00178763	0.00904065
4104	Ndc1	3790.44	-0.319548	0.102331	-3.12268	0.00179213	0.00905898
6501	CG13197	2047.12	-0.36047	0.115438	-3.12262	0.00179251	0.00905898
641	tzn	2116.8	-0.360761	0.115557	-3.12192	0.00179678	0.00907742
9212	AsnRS	9005.88	0.372851	0.119438	3.12171	0.00179807	0.00908075
15531	caps	2837.32	0.46529	0.149084	3.121	0.00180237	0.00909613
4272	CG11791	4154.78	0.292989	0.0939012	3.12019	0.00180737	0.00911819
16723	Plap	7943.86	-0.35323	0.113309	-3.11741	0.00182446	0.00919796
2268	dnt	1870.56	0.383854	0.123155	3.11684	0.00182798	0.00920929
8427	CG32176	2970.7	-0.330823	0.106155	-3.11641	0.00183067	0.00921962
16510	CG15412	167.06	0.961075	0.308493	3.11539	0.00183704	0.00924526
8689	CG17883	8323.57	-0.327451	0.105125	-3.11488	0.00184023	0.00925811
1881	B4	13229.7	-0.26707	0.0858034	-3.11259	0.00185455	0.00932045
11779	CG44242	1883.15	0.373952	0.12016	3.11211	0.00185758	0.00932919
7579	CG8405	9870.76	-0.265915	0.0854626	-3.11148	0.0018615	0.00934564
15822	can	318.108	-0.782506	0.251572	-3.11046	0.00186796	0.00937481
3994	Usp12-46	2194	0.399429	0.128437	3.10992	0.00187138	0.00938873
15948	ValRS-m	2622.95	-0.440458	0.141747	-3.10736	0.00188766	0.00946056
3689	CG5555	3142.55	-0.341744	0.110069	-3.10481	0.00190402	0.00953923
15119	Capr	31843.3	0.279285	0.0899598	3.10455	0.00190566	0.00954414
9713	ctrip	83514.7	-0.246922	0.0795519	-3.10391	0.00190983	0.0095617
14935	CG12204	2377.6	-0.482896	0.155614	-3.10316	0.00191468	0.00957938
2577	CG7800	1298.43	0.561928	0.181194	3.10126	0.001927	0.00963767
8266	Yp3	11909	-2.95109	0.951872	-3.10031	0.0019332	0.00966535
4395	E(spl)mgamma-HLH	2499.49	-0.431848	0.139428	-3.09727	0.0019531	0.00975808
7591	mRpL28	4516.97	0.305692	0.0987278	3.09631	0.00195943	0.00978634
2993	CG17360	6199.61	0.331264	0.107071	3.09388	0.00197556	0.00986349
3854	Cortactin	2989.52	-0.342383	0.110675	-3.09358	0.00197757	0.00986673
6229	CG8485	6589.24	-0.279582	0.0903941	-3.09292	0.00198197	0.00988182
4093	CG10254	7032.92	-0.365101	0.118043	-3.09296	0.00198174	0.00988182
6062	CG8388	1267.85	-0.407629	0.131875	-3.09103	0.0019946	0.0099414
10336	milt	22962.7	-0.249149	0.0806899	-3.08773	0.00201689	0.0100421
6054	CG8441	1709.9	-0.392932	0.127262	-3.08758	0.00201795	0.0100439
537	Sf3b1	12059.4	-0.285548	0.0925516	-3.08529	0.00203356	0.0101112
15981	CG6745	2973.93	0.327371	0.106208	3.08235	0.00205377	0.0102046
16308	slgA	15791.5	0.416197	0.135116	3.08028	0.00206804	0.0102652
9868	slim	5699.78	0.276356	0.0897542	3.07903	0.00207673	0.0103007
13895	CG12018	2505.46	0.408638	0.132763	3.07794	0.00208435	0.0103318
3453	CG17931	3839.39	0.33531	0.108982	3.07675	0.00209268	0.0103659
5693	BTBD9	2520.99	-0.384021	0.124837	-3.07617	0.00209676	0.010379
9051	htk	13828.8	-0.267407	0.086955	-3.07523	0.0021034	0.0104083
3329	Surf4	3901.3	0.298333	0.0970241	3.07484	0.00210617	0.0104149
8311	Spt20	6310.41	-0.309069	0.100515	-3.07487	0.00210598	0.0104149
877	CG10979	4619.31	-0.282644	0.0919356	-3.07436	0.00210951	0.0104279
1568	CG31715	1618.34	0.403761	0.131336	3.07426	0.00211026	0.010428
6994	CG11141	4397.58	-0.319975	0.104107	-3.07353	0.00211545	0.0104501
11899	Traf6	1793.54	-0.36949	0.120225	-3.07331	0.00211695	0.0104539
1498	pelo	3540.68	0.344162	0.112007	3.0727	0.00212133	0.010472
7750	RpS8	151319	-0.255522	0.0831709	-3.07225	0.00212451	0.0104841
2309	COX4	10752.8	0.343467	0.111827	3.07143	0.00213037	0.0105095
5824	LBR	10627.3	-0.302493	0.0985848	-3.06835	0.00215241	0.0106037
14936	pcm	7429.65	-0.283198	0.0925302	-3.06061	0.0022089	0.0108635
15908	CG3448	1053.38	-0.679265	0.222108	-3.05826	0.00222627	0.0109377
1754	CG6785	448.02	0.961535	0.31447	3.05764	0.00223091	0.0109531
15116	Chmp1	3967.86	0.291185	0.0952579	3.05681	0.0022371	0.010976
15506	Hsc70Cb	27764.8	-0.270863	0.088665	-3.0549	0.00225136	0.0110423
6458	Sr-CII	765.589	0.553633	0.181242	3.05467	0.00225312	0.0110471
2242	hook	3182.51	-0.326196	0.106805	-3.05414	0.0022571	0.0110629
15676	Pop2	5142.45	-0.273443	0.0895764	-3.05262	0.00226854	0.0111002
6372	CG13148	705.706	0.530103	0.17378	3.05043	0.0022851	0.0111737
1544	Npc1a	9247.43	-0.258016	0.0846214	-3.04906	0.0022956	0.0112212
9897	ps	25849.8	0.284539	0.0933262	3.04887	0.00229707	0.0112227
5711	CG9344	2313.72	0.388877	0.127563	3.0485	0.00229985	0.0112306
14152	Teh2	3019.76	0.420111	0.137894	3.04661	0.00231434	0.0112886
7374	HIP	9769.65	0.256685	0.0842708	3.04595	0.00231946	0.0113061
13791	Fas1	23744.4	0.597344	0.196579	3.0387	0.00237601	0.0115518
36	CG32816	285.374	0.752198	0.247695	3.03679	0.00239112	0.0116213
11551	Hph	6182.43	-0.328364	0.108133	-3.03668	0.00239203	0.0116219
9047	mute	8266.25	-0.253608	0.0835191	-3.03652	0.00239324	0.0116238
14742	wus	3066.2	-0.365728	0.12046	-3.0361	0.00239663	0.0116364
4213	Wsck	2547.19	-0.510038	0.168004	-3.03587	0.00239842	0.0116412
3305	ATPsynO	10096	0.362219	0.119327	3.03552	0.0024012	0.0116508
5861	dve	1669.06	0.521992	0.172086	3.03333	0.00241872	0.011724
7223	CG32206	3353.01	0.737366	0.243119	3.03295	0.00242178	0.011731
780	CG7133	2365.85	0.354514	0.116916	3.03221	0.00242772	0.0117533
7761	CG9776	13731.1	-0.26068	0.085986	-3.03166	0.00243217	0.0117655
2544	sgll	2069.07	-0.368209	0.121487	-3.03085	0.0024387	0.0117887
5764	CG9752	3912.87	0.325404	0.107396	3.02995	0.00244596	0.0118125
1018	CG31523	3404.35	0.301898	0.0996511	3.02955	0.0024492	0.0118242
1825	CG5439	2458.77	-0.375347	0.124055	-3.02565	0.00248098	0.0119656
7321	Torsin	3215.11	0.302995	0.100168	3.02485	0.00248754	0.0119893
429	CG12236	4385.01	-0.324822	0.107446	-3.02314	0.00250171	0.0120535
14155	Rop	9756.8	0.525885	0.174227	3.01838	0.00254127	0.0122319
9258	p	4625.49	0.309402	0.102591	3.01589	0.00256225	0.0123247
12568	Gp210	34411.7	-0.231968	0.0769139	-3.01594	0.00256181	0.0123247
5822	HmgD	56092.6	0.342766	0.113698	3.01471	0.00257222	0.0123644
14285	CG11699	2298.34	0.441001	0.146315	3.01405	0.00257785	0.0123792
268	CG12206	1684.66	0.673063	0.223425	3.01248	0.00259125	0.012427
14612	Gbeta13F	36836.6	0.269835	0.0896021	3.01148	0.0025998	0.0124597
13589	CanA-14F	7620.97	0.403172	0.133934	3.01024	0.00261045	0.0125067
5720	CG10527	6166.44	-0.595384	0.197822	-3.0097	0.00261508	0.0125247
6447	SmD3	2687.45	0.373975	0.124485	3.00417	0.00266305	0.0127418
15236	rogdi	3016.18	0.327459	0.109204	2.9986	0.00271222	0.0129513
6604	CG12338	559.674	0.592412	0.197655	2.9972	0.0027247	0.0129998
16203	CG10274	4387.23	-0.362099	0.120814	-2.99716	0.00272507	0.0129998
6706	prel	3990.05	0.297481	0.0992818	2.99633	0.00273251	0.013031
9799	Alh	14630.2	0.264737	0.088416	2.99422	0.00275148	0.0131128
3339	tefu	31011.9	-0.321435	0.107421	-2.99229	0.00276891	0.0131872
5603	Obp8a	719.76	-0.57621	0.192896	-2.98716	0.00281579	0.0133884
15721	RIOK1	5117.26	-0.370876	0.124189	-2.98639	0.00282291	0.0134169
4151	Spps	2382.77	-0.318278	0.106609	-2.98547	0.00283139	0.0134493
16048	CG7565	4388.86	-0.300848	0.100801	-2.98457	0.0028398	0.0134849
3282	RpS5b	75.2952	1.38551	0.464347	2.98378	0.00284709	0.0135106
15611	Pmm2	782.938	-0.452155	0.151634	-2.98188	0.00286483	0.0135859
3442	CG14903	879.267	0.489977	0.164341	2.98147	0.00286872	0.0135999
11782	CG44247	4661.51	0.466733	0.156567	2.98104	0.0028727	0.013612
4649	Cul5	3362.18	-0.289846	0.0972315	-2.98099	0.00287317	0.013612
4637	Cisd2	3847.9	0.307645	0.103254	2.97949	0.00288726	0.0136654
2699	TrpRS	4801.94	-0.306202	0.102845	-2.97732	0.00290781	0.0137536
15816	Gem3	6259.91	-0.293556	0.0986018	-2.97719	0.00290903	0.0137549
3279	CG3817	1923.35	0.363902	0.122261	2.97643	0.00291625	0.0137845
5775	CG4266	10168.8	-0.266288	0.0895162	-2.97475	0.00293227	0.0138467
14834	Rip11	5089.47	-0.327985	0.110276	-2.97423	0.00293726	0.0138657
16364	RhoGAP19D	15476.8	-0.276356	0.0929324	-2.97373	0.00294202	0.0138837
16190	Tnpo	20867.2	-0.335234	0.112741	-2.97348	0.00294448	0.0138907
16360	GstT3	1125.53	0.425943	0.14328	2.9728	0.00295096	0.0139077
15271	CG9674	71168.8	0.305079	0.102629	2.97264	0.00295249	0.0139104
12299	ghi	1739.13	0.401599	0.135118	2.97221	0.00295667	0.0139164
8033	hth	32061.7	0.247036	0.0832077	2.96891	0.00298856	0.0140483
4050	unk	27147.5	0.325118	0.109554	2.96764	0.00300093	0.0141018
14449	BthD	5609.22	0.396253	0.133633	2.96522	0.00302463	0.0142086
3312	mRpL9	1682.85	0.371083	0.125285	2.96192	0.00305729	0.0143341
9330	alphaSnap	11376	0.39387	0.133006	2.96129	0.00306357	0.0143589
445	Rab18	2190.71	0.378441	0.127834	2.96042	0.00307217	0.0143945
15259	CG9705	11489.4	0.301716	0.101937	2.95983	0.00307805	0.0144174
10240	CG43143	5602.28	0.265124	0.0895779	2.95971	0.00307932	0.0144187
14298	CG2247	10264.7	-0.242661	0.0820006	-2.95926	0.00308382	0.0144304
10627	Art7	3556.47	-0.295413	0.0998388	-2.9589	0.00308743	0.0144372
612	CG5104	1371.02	-0.372941	0.126044	-2.95881	0.00308826	0.0144372
2778	CG16779	6901.33	0.461104	0.15588	2.95807	0.00309575	0.0144535
9899	CG42672	5053.29	0.352264	0.119144	2.95662	0.00311032	0.0145122
2675	Cks85A	2726.35	-0.382921	0.12956	-2.95555	0.00312108	0.0145576
7899	CG15387	1027.91	0.41754	0.141403	2.95284	0.00314865	0.0146815
14073	CG14965	1407.26	-0.367331	0.124423	-2.95227	0.00315445	0.0147038
7884	CG8273	2018.44	-0.341258	0.115735	-2.94861	0.00319203	0.0148598
7706	mim	15656.1	-0.272095	0.0923054	-2.94777	0.00320078	0.014891
1278	CG31908	3977.91	0.305937	0.103834	2.94641	0.00321487	0.0149393
358	Pp2C1	11735	-0.325082	0.110333	-2.94637	0.00321525	0.0149393
714	Wnk	14278.7	-0.278829	0.0946575	-2.94567	0.00322261	0.0149637
15801	tna	13916.2	0.311109	0.105699	2.94336	0.00324667	0.0150616
5895	MESR4	20001.3	-0.275679	0.0936689	-2.94312	0.00324925	0.0150653
6966	DCTN4-p62	2741.99	-0.314493	0.10692	-2.94138	0.00326752	0.0151382
11281	spoon	25862.9	-0.270311	0.0919192	-2.94075	0.00327419	0.0151553
4152	twin	8201.97	-0.259511	0.0882933	-2.93919	0.00329073	0.0152262
103	AMPKalpha	7227.75	0.289478	0.0985366	2.93777	0.0033058	0.0152909
14604	Rhp	419.127	0.822808	0.280311	2.93534	0.00333178	0.0153915
427	CG16721	3161.92	0.315857	0.107601	2.93544	0.00333079	0.0153915
9274	stv	1474.17	-0.519718	0.177101	-2.93458	0.00333999	0.0154245
3660	NP15.6	4637.44	0.378903	0.129151	2.93379	0.0033485	0.015444
10778	CG4585	1549.6	-0.403053	0.137414	-2.93313	0.00335564	0.0154609
8109	His2B:CG33868	14793.7	-0.488672	0.16661	-2.93303	0.00335674	0.0154609
2045	c(2)M	548.005	-0.555007	0.189231	-2.93296	0.00335748	0.0154609
7171	CG33494	280.107	-0.824438	0.281104	-2.93286	0.0033586	0.0154611
1395	CG31897	677.698	-0.557154	0.190045	-2.93169	0.00337123	0.0155143
14097	Rdh	1234.76	0.377844	0.12895	2.93016	0.0033879	0.0155811
16646	aop	2397.48	0.386654	0.132021	2.92873	0.00340348	0.0156478
2494	alphaTub84B	161128	0.319415	0.109113	2.92738	0.00341835	0.0157027
16135	RpL18	78410.2	-0.262687	0.0897988	-2.92529	0.00344138	0.0157869
4930	CycK	9285.97	-0.285147	0.097493	-2.92479	0.00344686	0.015807
9261	Spf45	3400.99	-0.293623	0.100413	-2.92415	0.00345396	0.0158296
716	SAK	4777.58	-0.296776	0.10154	-2.92275	0.00346959	0.015887
3380	c(3)G	1030.07	-0.545959	0.186811	-2.92252	0.00347215	0.0158928
13784	tea	7349.68	-0.281643	0.096384	-2.9221	0.00347685	0.0159065
15260	CG9706	1115.23	-0.466018	0.159483	-2.92205	0.00347735	0.0159065
13931	CG12025	5216.32	-0.271215	0.0928723	-2.9203	0.00349698	0.0159913
14317	CG15739	151.556	1.29114	0.442147	2.92015	0.00349861	0.0159937
3344	CG6654	4300.41	-0.325914	0.111639	-2.91936	0.00350748	0.0160241
4275	CG11836	309.314	0.766037	0.262444	2.91886	0.0035131	0.0160346
1186	CG31638	5226.04	-0.276095	0.0945962	-2.91867	0.00351525	0.0160393
7551	Nup153	32730.5	-0.221276	0.0758176	-2.91854	0.00351677	0.0160412
16641	Uch	9672.11	0.270753	0.092797	2.91769	0.0035264	0.01608
5052	CheB42c	4874.45	-0.279813	0.0959459	-2.91636	0.00354143	0.0161282
4631	Usp1	6167.59	-0.278939	0.095662	-2.91588	0.00354684	0.0161478
6469	SkpB	168.217	-0.98751	0.338683	-2.91574	0.00354847	0.0161501
2576	Gie	2937.58	0.316921	0.108725	2.91488	0.00355825	0.0161794
6980	Dhx15	13838.6	-0.268085	0.0919748	-2.91477	0.00355951	0.01618
643	HIPP1	3431.15	0.294856	0.101213	2.91323	0.0035771	0.0162457
14739	Ubr1	27151.8	-0.323395	0.111071	-2.9116	0.00359584	0.0163195
10173	VhaAC45	12262.6	-0.245532	0.084402	-2.90908	0.0036249	0.0164404
890	disp	6134.73	-0.273186	0.0939108	-2.909	0.00362589	0.0164404
3061	CG12267	1547.03	-0.398668	0.137039	-2.90917	0.00362395	0.0164404
11435	gpp	13810.6	-0.232735	0.0800472	-2.90747	0.00364367	0.0165107
10763	CG3860	2132.06	0.395421	0.136139	2.90454	0.00367796	0.0166504
14039	CG12034	2610.75	-0.323731	0.111474	-2.9041	0.00368313	0.0166686
2263	Rab9	670.784	0.470775	0.162179	2.90282	0.00369824	0.0167265
2163	CG5783	557.119	0.593329	0.204421	2.90248	0.00370221	0.0167392
241	CG2662	1832.79	-0.391897	0.135057	-2.90173	0.00371114	0.0167691
1109	sip1	2471.62	-0.309046	0.106547	-2.90055	0.00372512	0.0168218
675	CG10510	455.387	0.682765	0.235549	2.89862	0.00374813	0.0169162
6369	Iswi	19854	0.25354	0.0874728	2.8985	0.00374954	0.0169162
7685	Med	5332.08	-0.30272	0.104438	-2.89856	0.00374884	0.0169162
8358	fbl	5466.98	-0.316794	0.109464	-2.89403	0.00380328	0.0171319
4212	puf	41991.4	-0.293119	0.101325	-2.89288	0.00381732	0.0171898
4686	IntS11	5923.95	-0.34714	0.120025	-2.89223	0.00382512	0.0172196
15037	CG8786	3954.09	-0.276474	0.095617	-2.89147	0.00383445	0.0172562
6674	CG1418	920.757	-0.456602	0.157925	-2.89126	0.00383706	0.0172626
9366	CG42239	1009.93	0.40472	0.140015	2.89056	0.0038456	0.0172832
7412	CG10395	3203.69	-0.346358	0.119904	-2.88864	0.00386918	0.0173747
15045	CG9279	5317.93	0.315635	0.109307	2.88761	0.00388175	0.0174257
15566	RpS12	56795.8	-0.24783	0.0858668	-2.88621	0.0038991	0.0174981
2281	CG33116	4292.46	-0.272758	0.0945512	-2.88476	0.00391713	0.0175736
14269	Ran	46622.7	0.266889	0.0925669	2.8832	0.00393657	0.0176444
11030	CG11000	3049.3	0.485725	0.168689	2.87941	0.00398418	0.0178357
9515	pzg	26547.5	-0.269656	0.0936691	-2.87881	0.00399177	0.0178628
11667	Nrg	29585.8	-0.258299	0.0897447	-2.87816	0.00400008	0.0178903
5071	galla-1	1801.88	0.336186	0.116818	2.87785	0.0040039	0.0179018
10826	uri	3666.03	-0.38038	0.132213	-2.87702	0.00401448	0.017938
14003	pgant6	1000.94	0.482039	0.167682	2.87471	0.00404395	0.0180612
1143	CG31643	1914.31	0.334272	0.116286	2.87457	0.00404578	0.0180612
9785	Rbsn-5	2117.14	-0.317951	0.110608	-2.87457	0.00404573	0.0180612
5726	CG3295	3641.26	0.284976	0.0991525	2.87412	0.00405161	0.0180816
10752	yki	1792.4	-0.354571	0.123402	-2.87329	0.00406217	0.0181176
680	CG10565	18002.6	-0.343388	0.119544	-2.87248	0.00407261	0.0181585
14671	CG9947	2012.39	0.326037	0.113551	2.87127	0.00408823	0.0182169
4267	Hr96	1694.87	-0.419928	0.146537	-2.86567	0.00416124	0.0185194
2856	CG4089	719.87	-0.459109	0.160248	-2.865	0.00417014	0.0185533
1982	vig	26665.6	0.269858	0.0942832	2.86221	0.00420702	0.0187002
15438	sstn	4170.33	-0.300298	0.104916	-2.86227	0.00420619	0.0187002
6650	Etf-QO	1673.14	0.356811	0.124692	2.86153	0.00421604	0.0187236
4045	Rad60	3111.87	-0.350435	0.122459	-2.86165	0.00421441	0.0187236
14901	CG14200	16361	-0.284533	0.0994543	-2.86094	0.00422385	0.0187462
154	Rtca	5908.29	0.261122	0.0912797	2.86068	0.00422738	0.0187561
16358	CG1695	2916.61	0.502048	0.175556	2.85976	0.00423961	0.018793
10589	asrij	4643.55	-0.370998	0.129822	-2.85774	0.00426664	0.0188955
7581	mRpL24	1803.01	0.354796	0.124222	2.85615	0.00428809	0.0189615
16420	CG15443	2052.24	0.344118	0.120476	2.8563	0.00428604	0.0189615
6448	CCT5	15527	0.254697	0.0891743	2.85617	0.00428788	0.0189615
8820	CG17691	6390.79	0.328616	0.115068	2.85584	0.00429233	0.0189744
15612	CG4069	3250.81	-0.314798	0.110249	-2.85534	0.00429913	0.0189929
2902	CG31388	1544.66	-0.356202	0.124798	-2.85422	0.00431424	0.0190402
4641	Slbp	4965.03	-0.405529	0.142076	-2.85432	0.00431293	0.0190402
926	MTA1-like	13304.3	-0.244111	0.085551	-2.8534	0.00432543	0.0190683
5749	tud	66596.4	-0.357265	0.125266	-2.85205	0.00434379	0.0191317
6025	Khc	11730.5	-0.285938	0.100284	-2.85128	0.00435435	0.0191666
987	CG1129	3620.22	-0.278355	0.0976706	-2.84993	0.00437284	0.0192304
15912	CG4022	4419.64	0.288896	0.101381	2.84961	0.00437732	0.0192442
16128	CG8602	4036.74	0.33135	0.116307	2.84892	0.00438675	0.0192681
3557	l(3)07882	6371.83	-0.285014	0.100043	-2.84893	0.00438661	0.0192681
2710	Prosbeta3	6244.9	0.392157	0.137667	2.8486	0.00439125	0.0192821
2061	crp	27091.4	-0.239419	0.0841628	-2.84471	0.00444512	0.0194831
5402	pod1	13593.8	0.249817	0.0878707	2.84301	0.00446895	0.0195757
2755	trbd	3615.21	-0.275404	0.0968871	-2.84252	0.00447583	0.019594
5915	CG6984	495.815	-0.541921	0.19067	-2.84219	0.00448043	0.0196081
14077	Usp5	7151.01	-0.301844	0.106219	-2.8417	0.00448734	0.0196265
14920	CG14223	324.7	-0.931198	0.327808	-2.84068	0.00450171	0.0196775
3039	Dip-C	2028.17	0.323919	0.114048	2.84021	0.00450838	0.0197007
13727	LIMK1	5624.44	-0.292513	0.103014	-2.83955	0.00451773	0.0197243
1642	Ubc2	7616.15	-0.330167	0.116283	-2.83935	0.00452062	0.0197243
1601	pie	1265.55	-0.371971	0.131076	-2.83782	0.00454229	0.019801
3446	Sdhaf3	687.644	0.482256	0.169979	2.83716	0.00455171	0.0198361
15371	brm	13889.1	-0.296513	0.104552	-2.83603	0.00456787	0.0198945
943	RpL35A	85169.6	-0.217662	0.0768159	-2.83355	0.00460344	0.0200314
10570	RYBP	2344.5	0.32103	0.113305	2.83331	0.00460685	0.0200341
3742	trem	1570.24	-0.33652	0.118773	-2.83332	0.00460677	0.0200341
4746	spn-A	1651.01	-0.364885	0.128812	-2.83271	0.00461558	0.020066
672	Ilk	2045.52	-0.353316	0.12479	-2.8313	0.00463597	0.0201486
15898	CG3529	2209.99	0.316454	0.111797	2.83062	0.00464583	0.0201794
3365	CG9590	2811.42	-0.31499	0.111298	-2.83015	0.00465267	0.020197
5369	P32	9585.82	0.337139	0.119273	2.82662	0.00470417	0.0203899
16366	Pp4-19C	7100.46	-0.243715	0.0862514	-2.82563	0.00471875	0.0204408
15152	TrpRS-m	2657.91	-0.293537	0.10388	-2.82572	0.00471739	0.0204408
7788	DCP2	26887.8	-0.232238	0.0821957	-2.82543	0.00472171	0.0204476
1563	CG4972	4241.95	-0.319471	0.113083	-2.8251	0.00472662	0.0204493
6187	CG30197	4047.39	-0.596469	0.211124	-2.8252	0.00472505	0.0204493
4482	CG5815	2239.85	-0.330761	0.117118	-2.82415	0.00474055	0.0204984
767	S1P	2100.56	-0.325893	0.115424	-2.82344	0.00475117	0.020526
206	CG2924	5412.57	0.286879	0.101626	2.82288	0.00475941	0.0205554
6512	tou	46765	0.231934	0.0822118	2.82117	0.00478487	0.0206592
9936	larp	76302	-0.211363	0.0750021	-2.81809	0.00483104	0.0208399
7751	Mgat2	4539.92	0.329004	0.116838	2.8159	0.0048641	0.0209575
10179	nsl1	21896.5	-0.22929	0.0814456	-2.81525	0.00487386	0.0209882
1472	Cks30A	14139.6	-0.264426	0.0939422	-2.81478	0.00488109	0.0210119
7120	pr	1425.22	0.357569	0.12709	2.81352	0.00490022	0.0210817
1621	bsk	5842.24	0.273439	0.0972062	2.81298	0.00490851	0.0211071
355	CG15912	488.146	-0.608856	0.216503	-2.81223	0.00491988	0.0211378
10836	CG3663	666.491	0.522844	0.185934	2.81198	0.00492379	0.0211391
1816	Tor	12767.1	-0.244134	0.086847	-2.81108	0.00493759	0.0211858
1296	CG5149	3367.79	-0.284267	0.101137	-2.8107	0.00494343	0.021192
2482	Ama	7903.43	0.30861	0.109817	2.81022	0.0049507	0.0212169
3666	CG6005	1290.34	-0.400419	0.142495	-2.81005	0.00495336	0.021222
5493	fs(1)h	60231.9	-0.230575	0.0821048	-2.8083	0.00498039	0.0213252
14601	CG17209	4919.51	-0.279819	0.0996731	-2.80737	0.00499478	0.0213741
119	eIF4E7	59.7621	-1.55909	0.555355	-2.80738	0.00499458	0.0213741
2006	CG3793	3411.39	-0.339603	0.120998	-2.80668	0.00500544	0.0214134
16263	vito	2007.44	-0.335807	0.11965	-2.80657	0.00500718	0.0214145
559	galectin	7004.84	0.280483	0.0999553	2.80609	0.00501471	0.0214404
5520	Trxr-1	20962	0.218025	0.0777353	2.80471	0.0050362	0.0215259
8214	RpL41	149744	0.25511	0.0910199	2.80279	0.00506621	0.0216286
16472	CG31955	47.835	-1.59241	0.568148	-2.8028	0.00506613	0.0216286
11182	CG43646	82.9343	1.20266	0.429154	2.80239	0.00507259	0.0216494
6444	Smyd4-4	3390.23	-0.294513	0.105105	-2.80207	0.00507759	0.0216644
16460	CG12795	1101.56	-0.402077	0.14352	-2.80154	0.00508594	0.0216936
10930	fwd	19071.6	-0.240238	0.0857659	-2.80109	0.00509298	0.0217109
6476	Mtor	37852.7	-0.241819	0.0863297	-2.80111	0.00509279	0.0217109
2994	Lk6	104925	-0.304616	0.108848	-2.79854	0.00513348	0.0218641
1674	RpL9	116817	-0.222695	0.0796038	-2.79754	0.0051494	0.0219255
3741	CG10889	1446.21	-0.346606	0.124004	-2.79513	0.00518795	0.0220636
717	Hr78	2137.74	0.322094	0.115241	2.79496	0.00519068	0.0220688
2231	brat	65257.7	0.344647	0.123328	2.79456	0.00519702	0.0220827
3567	CG17802	2014.65	-0.381861	0.136723	-2.79296	0.00522279	0.0221857
2801	CG9471	1044.12	0.49334	0.176737	2.79138	0.00524843	0.0222692
9259	vvl	7728.74	0.259694	0.0930726	2.79023	0.00526708	0.0223357
1692	Wdr59	3291.69	-0.28947	0.103745	-2.79021	0.00526735	0.0223357
[truncated: 4,660 more rows]

## Sheet: pvalue<0,001
NA.	baseMean	log2FoldChange	lfcSE	stat	pvalue	padj
CG42566	1240.2	5.30157	0.241922	21.9144	1.89529e-106	4.5689e-103
CG4250	2072.22	3.64765	0.19348	18.8529	2.78256e-79	3.65881e-76
E23	5282.71	3.44385	0.131517	26.1857	3.86893e-151	2.79801e-147
D	610.66	3.34961	0.30481	10.9892	4.3085e-28	6.42456e-26
D	610.66	3.34961	0.30481	10.9892	4.3085e-28	6.42456e-26
GstS1	3351.05	2.89515	0.630036	4.59522	4.32299e-06	4.8284e-05
CG32365	286.537	2.58636	0.330026	7.83686	4.61955e-15	2.15539e-13
CG17834	284.297	2.57493	0.330021	7.80234	6.07685e-15	2.7815e-13
CG31875	355.604	2.52194	0.316408	7.97052	1.58003e-15	7.74696e-14
RpS19b	142.434	2.48761	0.469088	5.30306	1.13874e-07	1.77296e-06
sna	4006.39	2.44473	0.127478	19.1777	5.68027e-82	8.21594e-79
Pka-C3	465.094	2.4337	0.274571	8.86365	7.74392e-19	5.11452e-17
Thor	4104	2.29406	0.15204	15.0885	1.92636e-51	8.44329e-49
tut	349.672	2.24399	0.315062	7.12236	1.06096e-12	3.68004e-11
Scp1	1918.99	2.23437	0.217578	10.2693	9.69188e-25	1.12147e-22
Strn-Mlck	6888.85	2.14537	0.459818	4.66568	3.07592e-06	3.55921e-05
CG7059	1435.73	2.08996	0.213366	9.79518	1.18082e-22	1.08786e-20
CG13741	2886.16	2.02398	0.150968	13.4066	5.52971e-41	1.66629e-38
Ubx	2154.48	1.9908	0.174924	11.3809	5.20564e-30	8.96362e-28
Trim9	9191.88	1.9884	0.110924	17.9258	7.41477e-72	6.70296e-69
TM4SF	3941.11	1.95858	0.244412	8.01345	1.11532e-15	5.60141e-14
ttk	2660.01	1.93891	0.110418	17.5598	5.00756e-69	4.02385e-66
CG1806	577.999	1.88024	0.185093	10.1584	3.04169e-24	3.33296e-22
CG6024	6176.91	1.87514	0.110625	16.9504	1.91248e-64	1.3831e-61
fw	4084.02	1.86616	0.198104	9.42008	4.50732e-21	3.50505e-19
AsnS	2994.98	1.83513	0.132575	13.8422	1.41836e-43	4.55894e-41
Ptr	3740.27	1.82719	0.128278	14.2439	4.89017e-46	1.76829e-43
CG42747	2031.58	1.80723	0.22387	8.07264	6.8792e-16	3.56633e-14
CG6470	107.459	1.7897	0.412606	4.33754	1.44083e-05	0.000140622
CG13055	438.376	1.7507	0.255064	6.86379	6.70589e-12	2.0949e-10
CG13894	1908.89	1.74827	0.124739	14.0154	1.25475e-44	4.32112e-42
CG5535	8608.87	1.74425	0.146996	11.866	1.77728e-32	3.34774e-30
esg	4026.33	1.72097	0.104178	16.5195	2.65424e-61	1.66917e-58
CG1628	704.175	1.7119	0.256097	6.68458	2.3159e-11	6.75346e-10
Dhit	2678.89	1.69902	0.158087	10.7474	6.09577e-27	8.31785e-25
Hsp67Bc	360.84	1.69874	0.257242	6.60366	4.01136e-11	1.1288e-09
CG14937	1241.89	1.66918	0.14088	11.8482	2.19948e-32	4.07862e-30
CG13300	768.81	1.65619	0.213946	7.74118	9.85012e-15	4.4109e-13
Sptr	895.799	1.62414	0.181994	8.92413	4.4922e-19	3.07939e-17
hig	76652.2	1.58099	0.105772	14.9471	1.62562e-50	6.53139e-48
mnd	7553.46	1.57789	0.0939978	16.7864	3.0681e-63	2.11319e-60
GstE8	578.34	1.52983	0.274182	5.57963	2.4103e-08	4.32538e-07
nAChRalpha3	8057.34	1.52279	0.130426	11.6755	1.70028e-31	3.07411e-29
CG4096	2004.5	1.49825	0.165325	9.06243	1.27575e-19	9.13484e-18
Spn27A	862.616	1.49439	0.167146	8.94061	3.87035e-19	2.66575e-17
mas	411.409	1.47269	0.283575	5.19329	2.06614e-07	3.02283e-06
lin-28	1951.24	1.46886	0.148199	9.91139	3.71424e-23	3.62992e-21
robo2	5314.11	1.43877	0.200558	7.17382	7.29352e-13	2.58562e-11
Cyp4p2	1307.97	1.43488	0.178055	8.05863	7.71556e-16	3.98564e-14
Imp	290575	1.4221	0.095359	14.9132	2.7066e-50	1.05806e-47
CG10508	11426.2	1.41572	0.114822	12.3297	6.26698e-35	1.51076e-32
CHES-1-like	5134.38	1.40109	0.133491	10.4957	9.03617e-26	1.11709e-23
HmgZ	9572.41	1.39689	0.189266	7.38053	1.57666e-13	6.18017e-12
sn	2544.36	1.39359	0.115133	12.1041	1.00425e-33	2.26961e-31
miple2	1949.88	1.38319	0.140206	9.86547	5.87574e-23	5.62826e-21
crb	1135.08	1.3745	0.164822	8.33928	7.47442e-17	4.15808e-15
ImpL2	2597.44	1.3675	0.114358	11.9581	5.89173e-33	1.18358e-30
CG30089	6951.69	1.36083	0.114264	11.9096	1.05498e-32	2.03457e-30
CG3726	925.414	1.34992	0.168476	8.01253	1.12371e-15	5.62399e-14
alpha-Est10	299.365	1.34851	0.24403	5.52599	3.27631e-08	5.63479e-07
kdn	8185.5	1.3476	0.156174	8.62886	6.19676e-18	3.68848e-16
fz	2523.36	1.34423	0.124438	10.8024	3.3537e-27	4.70951e-25
dap	3405.82	1.32503	0.128287	10.3286	5.23227e-25	6.25451e-23
EndoU	254.552	1.31171	0.261479	5.0165	5.26221e-07	7.05399e-06
CG31030	10732	1.31148	0.127636	10.2751	9.12516e-25	1.07306e-22
CG3587	526.012	1.29241	0.203461	6.35212	2.12373e-10	5.41757e-09
Lim1	1901.85	1.2765	0.160137	7.97131	1.57006e-15	7.72428e-14
CG1927	1307.19	1.26208	0.155705	8.10559	5.24882e-16	2.7309e-14
CG11155	12537.9	1.25466	0.118755	10.5651	4.32622e-26	5.44126e-24
MFS3	5624.13	1.25087	0.11631	10.7546	5.63719e-27	7.76536e-25
fok	3984.08	1.24726	0.109825	11.3568	6.86347e-30	1.15434e-27
nAChRalpha5	25892.9	1.24428	0.0944045	13.1803	1.14004e-39	3.11124e-37
vri	2728.1	1.23528	0.191718	6.44324	1.16951e-10	3.12677e-09
CG12768	2111.68	1.23499	0.135599	9.10766	8.41777e-20	6.14922e-18
CG15651	1809.63	1.22351	0.167672	7.29707	2.94103e-13	1.0992e-11
CG5731	712.252	1.21301	0.246352	4.92388	8.48458e-07	1.0928e-05
mlt	3630.7	1.21207	0.0974634	12.4362	1.66256e-35	4.14607e-33
wnd	2232.32	1.20911	0.138648	8.72071	2.76468e-18	1.7089e-16
elav	15331.2	1.20146	0.0853331	14.0796	5.06774e-45	1.7878e-42
Actbeta	5476.56	1.20006	0.122334	9.80971	1.02267e-22	9.54314e-21
tio	4455.17	1.19872	0.105499	11.3624	6.43383e-30	1.09481e-27
CG34347	10573.2	1.19542	0.125857	9.49821	2.13534e-21	1.73514e-19
skl	974.895	1.18181	0.243636	4.85071	1.23023e-06	1.53002e-05
Task6	5584.97	1.18062	0.0990284	11.9221	9.08083e-33	1.79925e-30
CG15309	2227.26	1.17556	0.14932	7.87281	3.46769e-15	1.63911e-13
CG31886	279.267	1.17536	0.282068	4.16695	3.08702e-05	0.000275451
CG31690	2270	1.16609	0.139622	8.35179	6.72339e-17	3.75471e-15
CG6765	3472.11	1.15889	0.11931	9.71326	2.64721e-22	2.36353e-20
CG45781	1499.69	1.15365	0.167038	6.90654	4.96603e-12	1.56831e-10
CG4404	1754.83	1.14935	0.123775	9.28581	1.60482e-20	1.2027e-18
CG11658	2512.73	1.14786	0.116144	9.88304	4.93159e-23	4.75537e-21
Cdk4	933.102	1.14465	0.190896	5.9962	2.01991e-09	4.3541e-08
Nrx-1	23006.8	1.13447	0.169075	6.70985	1.94821e-11	5.70422e-10
pdm3	3151.09	1.1324	0.183295	6.178	6.49187e-10	1.5268e-08
Coop	2505.89	1.13096	0.220338	5.13282	2.85432e-07	4.03961e-06
CG17292	1081.06	1.12178	0.156448	7.17031	7.48276e-13	2.64622e-11
Gpdh	5019.06	1.11941	0.149985	7.46348	8.42679e-14	3.48243e-12
CG9801	6531.92	1.11923	0.0943239	11.8658	1.78219e-32	3.34774e-30
CG12112	659.828	1.11595	0.166043	6.72083	1.80693e-11	5.31595e-10
CG3857	607	1.10798	0.211827	5.23058	1.68982e-07	2.53281e-06
CG13293	3380.4	1.10372	0.102276	10.7916	3.76992e-27	5.24309e-25
CG31800	936.363	1.10335	0.18486	5.96856	2.39351e-09	5.10615e-08
Mdh2	6800.29	1.09783	0.115303	9.52128	1.71062e-21	1.40582e-19
CG31140	7573.61	1.08621	0.158438	6.85578	7.09265e-12	2.20619e-10
Dic1	2342.89	1.081	0.113999	9.48251	2.48244e-21	1.99477e-19
CBP	8242.02	1.0628	0.120676	8.80703	1.28505e-18	8.27632e-17
CG12948	896.206	1.05659	0.182163	5.80026	6.62127e-09	1.31372e-07
CG10424	791.665	1.05402	0.158392	6.65446	2.84343e-11	8.17641e-10
Sik3	3527.27	1.0538	0.10313	10.2181	1.64451e-24	1.84389e-22
Nmdmc	1356.18	1.0506	0.148504	7.07457	1.49909e-12	5.07793e-11
fz2	7886.95	1.04538	0.1107	9.44328	3.61274e-21	2.87114e-19
Galt	592.351	1.04043	0.215683	4.82387	1.40799e-06	1.73026e-05
CG12262	3968.06	1.03828	0.0977252	10.6245	2.2917e-26	2.93337e-24
w	12603.9	1.03491	0.166536	6.21432	5.15489e-10	1.22431e-08
CG11883	4163.54	1.02924	0.116832	8.80965	1.25542e-18	8.14277e-17
CG6329	15135.4	1.02548	0.152584	6.72072	1.80825e-11	5.31595e-10
CG12643	6863.87	1.0249	0.12519	8.18676	2.68345e-16	1.42697e-14
sif	65758.5	1.01904	0.103498	9.84598	7.13416e-23	6.74434e-21
CG43324	2489.17	1.01815	0.131917	7.71813	1.18048e-14	5.23755e-13
krimp	3290.97	1.01533	0.167459	6.06317	1.33461e-09	2.98358e-08
Mkp3	5480.91	1.00816	0.0915714	11.0095	3.4388e-28	5.29137e-26
CG17896	3811.12	1.00329	0.0982681	10.2097	1.79357e-24	1.99555e-22
Gbs-76A	4595.19	1.00148	0.0990896	10.1068	5.15458e-24	5.52265e-22
CG12071	983.521	1.00115	0.164935	6.06996	1.27943e-09	2.8691e-08
PCB	7846.25	0.998851	0.11541	8.6548	4.93766e-18	2.98821e-16
Gapdh1	20770.2	0.998405	0.113231	8.81738	1.17165e-18	7.63367e-17
miple1	12564.1	0.995968	0.168177	5.92216	3.17749e-09	6.63193e-08
CG31612	629.53	0.987208	0.17708	5.57492	2.47639e-08	4.42203e-07
pyx	2781.42	0.985581	0.103879	9.48774	2.36092e-21	1.90773e-19
plum	40279.3	0.983293	0.0973012	10.1057	5.21442e-24	5.54569e-22
CG5282	1323.69	0.980463	0.197662	4.96029	7.03869e-07	9.23007e-06
CG8080	1709.92	0.973367	0.124421	7.82315	5.15191e-15	2.39605e-13
bou	1134.34	0.969467	0.167198	5.79831	6.69872e-09	1.32726e-07
tara	5473.85	0.963934	0.098367	9.79936	1.133e-22	1.05049e-20
sesB	64016.2	0.961485	0.125842	7.64041	2.16527e-14	9.43329e-13
CG42492	7754.75	0.955356	0.169127	5.64876	1.61614e-08	3.00074e-07
CG43693	2704.91	0.951434	0.141418	6.72781	1.72236e-11	5.09453e-10
pgant2	2731.5	0.947795	0.139366	6.80076	1.04068e-11	3.18907e-10
CG9164	1818.73	0.945415	0.134505	7.02884	2.0826e-12	6.95676e-11
sdt	9189.24	0.945191	0.0955191	9.89531	4.36244e-23	4.23479e-21
bam	3087.14	0.942428	0.106028	8.88846	6.19594e-19	4.16828e-17
CG34384	11201.1	0.941034	0.0863265	10.9009	1.14154e-27	1.68482e-25
Pld	1496.65	0.939829	0.150243	6.25538	3.96558e-10	9.5422e-09
egr	3625.81	0.937807	0.118384	7.92174	2.34201e-15	1.13674e-13
CG17803	4734.83	0.930861	0.103004	9.03717	1.60782e-19	1.1394e-17
path	18158.3	0.927786	0.125641	7.38445	1.53089e-13	6.03344e-12
Toll-7	13514.9	0.923736	0.124638	7.41135	1.25022e-13	4.99536e-12
PIP5K59B	4439.26	0.921753	0.13118	7.0266	2.11622e-12	7.03656e-11
wun2	841.238	0.919089	0.175391	5.24023	1.60373e-07	2.41377e-06
CG14234	7998.79	0.916965	0.143065	6.40944	1.46059e-10	3.82025e-09
CG3829	4741.17	0.911915	0.129362	7.0493	1.79816e-12	6.06259e-11
Fie	3893.51	0.905741	0.147399	6.14482	8.00546e-10	1.84675e-08
CG43689	839.475	0.90008	0.159335	5.64899	1.61394e-08	3.00051e-07
CG43778	8272.23	0.893063	0.20891	4.27488	1.91244e-05	0.000180088
Eip75B	9527.2	0.890668	0.0935315	9.52265	1.68823e-21	1.39534e-19
dpr18	2475.88	0.889164	0.167364	5.31277	1.0797e-07	1.69379e-06
CG43066	23968	0.882882	0.0782916	11.2768	1.70779e-29	2.80698e-27
Pdk1	16221.7	0.878241	0.110097	7.977	1.49935e-15	7.40156e-14
CG45071	1196.21	0.870451	0.136227	6.38971	1.66203e-10	4.29278e-09
pxb	4427.64	0.867837	0.0962873	9.01299	2.00506e-19	1.40103e-17
CG6770	12780.2	0.867726	0.161077	5.38704	7.16273e-08	1.17064e-06
fend	5621.91	0.866967	0.0915908	9.46566	2.91721e-21	2.33119e-19
Chd64	13080.5	0.865877	0.11493	7.53396	4.92251e-14	2.08795e-12
alpha-Est9	7766.34	0.864916	0.128419	6.7351	1.63815e-11	4.87536e-10
Gapdh2	28511.3	0.862291	0.134919	6.39117	1.6462e-10	4.25952e-09
cwo	3876.31	0.859962	0.165399	5.19931	2.00027e-07	2.94622e-06
CRAT	982.967	0.850897	0.174546	4.87491	1.08857e-06	1.37392e-05
Ids	555.02	0.848891	0.195553	4.34097	1.41854e-05	0.000138915
CG15771	1324.93	0.846896	0.174023	4.86657	1.13553e-06	1.4282e-05
UbcE2H	5970.39	0.846766	0.0954013	8.87584	6.94085e-19	4.62638e-17
Eip55E	3113.24	0.845612	0.144479	5.85284	4.83254e-09	9.76228e-08
Sap47	40084.6	0.844786	0.160175	5.27413	1.33386e-07	2.03726e-06
shep	32596	0.839564	0.133008	6.31212	2.75243e-10	6.82866e-09
Atpalpha	95790.4	0.837499	0.189209	4.42631	9.58596e-06	9.77106e-05
unc-5	5040.33	0.835513	0.1649	5.06679	4.04583e-07	5.56792e-06
CG12605	3788.56	0.831995	0.142304	5.84659	5.01753e-09	1.01218e-07
nAChRalpha6	3892.77	0.830833	0.152555	5.44611	5.1482e-08	8.52962e-07
Rbp	7373.06	0.824743	0.177965	4.63429	3.58162e-06	4.08231e-05
LpR1	7848.87	0.822054	0.100901	8.14714	3.72619e-16	1.96699e-14
Galphao	9864.45	0.820378	0.150034	5.46794	4.55293e-08	7.57809e-07
SPoCk	25033.7	0.819409	0.0819507	9.9988	1.54257e-23	1.57125e-21
side	3488.84	0.819098	0.183324	4.46804	7.894e-06	8.24396e-05
CG1902	1440.44	0.817479	0.192494	4.24677	2.16874e-05	0.000200438
RapGAP1	2561.81	0.815081	0.18241	4.46841	7.88024e-06	8.23982e-05
RhoU	1983.95	0.814329	0.116939	6.96372	3.31403e-12	1.07238e-10
Vha68-1	11215.4	0.81309	0.203584	3.99387	6.50029e-05	0.000527019
Gpo-1	3057.02	0.811186	0.205169	3.95374	7.69394e-05	0.000609091
CG13404	1433.95	0.811009	0.187853	4.31725	1.57986e-05	0.000151834
Fur1	5067.49	0.810573	0.104086	7.78757	6.83104e-15	3.11685e-13
Ant2	3816.56	0.809201	0.122483	6.60662	3.93195e-11	1.10861e-09
l(1)G0289	6579.3	0.808894	0.108463	7.45777	8.79976e-14	3.62621e-12
CG2865	2149.79	0.807038	0.130796	6.17022	6.81948e-10	1.60125e-08
Act42A	23703.6	0.803624	0.12741	6.30741	2.83747e-10	7.02759e-09
CG42445	551.736	0.797065	0.206485	3.86015	0.000113316	0.000850987
CG8036	29895.1	0.796453	0.0937756	8.49318	2.01051e-17	1.16787e-15
Hr39	3071.27	0.794956	0.135087	5.88478	3.98591e-09	8.16604e-08
shn	9422.11	0.794252	0.0899092	8.83394	1.01056e-18	6.61393e-17
yip2	2526.94	0.793232	0.137534	5.76753	8.04415e-09	1.56596e-07
Cad96Ca	5356.85	0.790863	0.125589	6.29721	3.0305e-10	7.44196e-09
Ald	29391.7	0.789996	0.12756	6.19313	5.89795e-10	1.38938e-08
nrv2	26236.5	0.789629	0.161333	4.89442	9.85984e-07	1.24771e-05
CG8248	853.543	0.78941	0.158303	4.98671	6.1416e-07	8.14227e-06
Appl	18132	0.787864	0.18718	4.20913	2.56355e-05	0.000233938
l(2)37Bb	1557.96	0.787397	0.142066	5.54248	2.98212e-08	5.21564e-07
Mekk1	4552.48	0.786339	0.0929367	8.46102	2.65045e-17	1.51526e-15
GlyP	8090.36	0.786266	0.156132	5.0359	4.75612e-07	6.44728e-06
Pdxk	1666.36	0.781993	0.14659	5.33456	9.57769e-08	1.51732e-06
Gdh	21551.3	0.781404	0.0858357	9.10348	8.74802e-20	6.35836e-18
X11Lbeta	4106.29	0.779828	0.19574	3.98399	6.7767e-05	0.000546977
Gip	1642.49	0.777743	0.140537	5.53409	3.1284e-08	5.4386e-07
Cyt-c-p	9999.75	0.776622	0.129577	5.99353	2.05336e-09	4.41962e-08
Parp	14428.2	0.775961	0.0965078	8.0404	8.95439e-16	4.54443e-14
mrt	3987.9	0.772902	0.118645	6.51441	7.29747e-11	1.98777e-09
CG14015	1119.06	0.769323	0.182912	4.20597	2.59959e-05	0.000237078
Tm1	10836.1	0.766704	0.121353	6.31794	2.65066e-10	6.61021e-09
CG2767	3295.6	0.764902	0.148093	5.16501	2.40432e-07	3.45686e-06
CG6767	14230.2	0.762224	0.108266	7.04032	1.91801e-12	6.45166e-11
Zasp66	1094.65	0.75165	0.138871	5.41259	6.21199e-08	1.02102e-06
sm	14998.4	0.751268	0.160026	4.69467	2.67042e-06	3.12247e-05
CG11158	709.299	0.750846	0.169812	4.42163	9.79595e-06	9.95703e-05
Mgstl	1580.63	0.750616	0.151585	4.95178	7.35391e-07	9.60857e-06
phr	6018.56	0.746251	0.103299	7.2242	5.04066e-13	1.84577e-11
blw	42344	0.745627	0.125152	5.95779	2.55665e-09	5.4222e-08
Lsd-2	2097.1	0.742689	0.128576	5.77628	7.63719e-09	1.49478e-07
bip1	1914.87	0.742574	0.12314	6.0303	1.63656e-09	3.58655e-08
CG13928	18821.3	0.741364	0.0834753	8.88123	6.6123e-19	4.42779e-17
Eaat1	38126.3	0.737299	0.0995404	7.40703	1.29155e-13	5.13215e-12
Pglym78	8134.4	0.734935	0.129542	5.67334	1.4004e-08	2.64431e-07
Tom40	7660.37	0.733232	0.111645	6.56754	5.11525e-11	1.41466e-09
onecut	24747.6	0.729567	0.083536	8.73356	2.4677e-18	1.53188e-16
nmo	7780.02	0.727005	0.0958302	7.58638	3.28964e-14	1.42034e-12
HIP-R	9095.8	0.725652	0.153915	4.71463	2.42145e-06	2.8591e-05
Ptp10D	5894.92	0.724168	0.124927	5.79672	6.76259e-09	1.33444e-07
mRpS10	869.77	0.723684	0.173727	4.16564	3.10478e-05	0.000276694
stx	8956.52	0.72152	0.103631	6.9624	3.34535e-12	1.07766e-10
dnc	6594.22	0.714229	0.161918	4.41105	1.02872e-05	0.000104198
GlyS	7157.18	0.711311	0.105573	6.73764	1.60983e-11	4.81087e-10
udd	2096.21	0.708837	0.128911	5.49866	3.82684e-08	6.5196e-07
bun	33920.2	0.708475	0.0916087	7.7337	1.04463e-14	4.66344e-13
CG42258	4861.17	0.701295	0.0951462	7.37071	1.69724e-13	6.61693e-12
CG9399	1319.76	0.701229	0.140943	4.97525	6.51641e-07	8.60762e-06
Dak1	5673.83	0.700649	0.111331	6.29337	3.10653e-10	7.60285e-09
ATPsynbeta	52838.6	0.697301	0.106012	6.57756	4.78235e-11	1.33279e-09
CG9663	1371.79	0.685134	0.143015	4.79064	1.66249e-06	2.01224e-05
CG6790	1914.72	0.682639	0.175745	3.88426	0.000102643	0.000780561
CG17129	572.294	0.680908	0.17636	3.86089	0.000112976	0.000848878
UQCR-14	5960.27	0.680408	0.123086	5.52792	3.24048e-08	5.58645e-07
CG31815	1591.18	0.679457	0.15604	4.35437	1.33449e-05	0.000131845
rdgB	12223.8	0.679195	0.093334	7.27704	3.41234e-13	1.2688e-11
sun	5096.89	0.676697	0.108183	6.25514	3.97152e-10	9.5422e-09
prage	1554.31	0.676267	0.148849	4.54331	5.53768e-06	6.00427e-05
CG15098	16863.6	0.672856	0.0935997	7.18865	6.5433e-13	2.33109e-11
Mtap	1840.52	0.671834	0.126634	5.30533	1.12471e-07	1.75679e-06
mgr	3611.49	0.670752	0.107088	6.26357	3.76256e-10	9.08541e-09
vn	3692.25	0.667184	0.163459	4.08165	4.47174e-05	0.000382039
CG3609	1804.97	0.663846	0.155887	4.25852	2.05786e-05	0.000191168
CG3679	5219.81	0.661758	0.140211	4.71972	2.36171e-06	2.79312e-05
CG13920	2644.29	0.658531	0.13852	4.75405	1.99378e-06	2.38331e-05
ATPsynC	49747.3	0.656733	0.131745	4.98489	6.19965e-07	8.2117e-06
robo1	5843.1	0.654595	0.111726	5.85891	4.65916e-09	9.45162e-08
ATPsyngamma	11573.7	0.653197	0.113118	5.7745	7.71838e-09	1.50863e-07
CG2124	891.359	0.652407	0.167908	3.8855	0.00010212	0.000777402
CanB2	2952.17	0.652207	0.102012	6.39341	1.62229e-10	4.20515e-09
FER	5041.59	0.65099	0.121344	5.36483	8.10274e-08	1.3022e-06
CG4467	10986.5	0.65044	0.112555	5.77884	7.52157e-09	1.47415e-07
UQCR-Q	4798.58	0.649237	0.120673	5.38014	7.44285e-08	1.20823e-06
bru3	7078.49	0.645387	0.144765	4.45816	8.26674e-06	8.59599e-05
dally	8352.75	0.642235	0.148601	4.32188	1.54702e-05	0.000149274
COX6B	7994.44	0.639675	0.10031	6.37699	1.80604e-10	4.63989e-09
Su(z)2	3370.9	0.639107	0.130003	4.91609	8.82903e-07	1.13212e-05
VhaM9.7-a	1307.79	0.63874	0.159379	4.00768	6.13181e-05	0.000501643
Kul	1792.52	0.637564	0.165558	3.85101	0.000117634	0.000880673
REPTOR	18598.5	0.632623	0.134633	4.69888	2.61586e-06	3.06115e-05
CG14812	2138.32	0.63256	0.113111	5.5924	2.23947e-08	4.03887e-07
eas	3721.75	0.629972	0.103607	6.0804	1.1988e-09	2.70507e-08
scrt	12715.5	0.629341	0.116142	5.41874	6.00211e-08	9.87651e-07
Antp	24992.1	0.629146	0.0834513	7.53908	4.73299e-14	2.01347e-12
for	2263.35	0.628332	0.118991	5.28051	1.28828e-07	1.97391e-06
arm	18414.9	0.627459	0.107103	5.85849	4.67088e-09	9.46213e-08
Sps2	3756.68	0.626774	0.113066	5.54342	2.96614e-08	5.203e-07
CG7630	5779.72	0.626383	0.114157	5.48703	4.08744e-08	6.90663e-07
Lcch3	2279.18	0.623764	0.147703	4.2231	2.4096e-05	0.000220725
NK7.1	2621.85	0.623639	0.120013	5.19644	2.03141e-07	2.98601e-06
mamo	8189.32	0.619598	0.152543	4.06179	4.86974e-05	0.000411665
ATPsynE	4993.05	0.616858	0.136933	4.50481	6.6431e-06	7.06513e-05
RabX4	1230.08	0.615466	0.149771	4.10937	3.96746e-05	0.000343625
CG6330	9581.78	0.615067	0.0915153	6.72092	1.80584e-11	5.31595e-10
jim	30241.9	0.614515	0.0818166	7.51088	5.87293e-14	2.4838e-12
CG11858	1742.4	0.61449	0.146816	4.18545	2.84597e-05	0.00025638
olf413	14637.8	0.614335	0.0854225	7.19173	6.39753e-13	2.29044e-11
CG5828	1960.87	0.613308	0.134043	4.57546	4.75176e-06	5.24252e-05
CG12099	6750.15	0.613253	0.14107	4.34715	1.37916e-05	0.000135517
DOR	2376.97	0.61125	0.108791	5.61857	1.92548e-08	3.52534e-07
DOR	2376.97	0.61125	0.108791	5.61857	1.92548e-08	3.52534e-07
Rab1	15556.3	0.610929	0.0921935	6.62659	3.4352e-11	9.81951e-10
Pcd	1464.39	0.610648	0.133339	4.57966	4.65737e-06	5.15806e-05
CG34404	4221.74	0.609333	0.0989367	6.15882	7.32881e-10	1.70424e-08
CG11652	1886.1	0.609225	0.11707	5.20392	1.95133e-07	2.88885e-06
COX5B	4618.88	0.608887	0.119741	5.08505	3.67525e-07	5.09184e-06
CG3270	1628.72	0.608753	0.12674	4.80315	1.56185e-06	1.89518e-05
Ggamma1	28333.9	0.608637	0.138241	4.40272	1.069e-05	0.0001076
CG14683	3272.7	0.60385	0.139429	4.33088	1.48517e-05	0.000144132
pon	7458.83	0.602982	0.0875958	6.88368	5.83242e-12	1.82994e-10
CG32576	6850.67	0.602872	0.111821	5.39138	6.99188e-08	1.14531e-06
Hsc70-4	294232	0.599293	0.0937022	6.39572	1.5979e-10	4.14937e-09
CG8891	3269.58	0.598299	0.120156	4.97935	6.37981e-07	8.43488e-06
Prosap	8285.71	0.597707	0.120751	4.94992	7.4245e-07	9.68331e-06
hwt	6379.59	0.597282	0.118262	5.05049	4.40688e-07	6.00199e-06
l(1)G0156	9204.89	0.596299	0.117829	5.06071	4.17696e-07	5.71575e-06
Ttd14	6741.57	0.596135	0.151865	3.92542	8.6579e-05	0.000672184
stan	56284.2	0.595829	0.0763485	7.80408	5.99387e-15	2.75223e-13
GstD3	1754.17	0.594463	0.155707	3.81782	0.000134636	0.00098801
CG7920	7344.15	0.593403	0.0881138	6.7345	1.6449e-11	4.88537e-10
dome	3434.56	0.593207	0.147295	4.02734	5.64104e-05	0.000466773
CG3164	10852.2	0.591833	0.135208	4.37722	1.20201e-05	0.000119573
Cdk5alpha	2156.76	0.591659	0.154549	3.8283	0.00012903	0.000952676
hkb	9868.25	0.591575	0.0850003	6.95969	3.41026e-12	1.09613e-10
fabp	14559.2	0.591482	0.115723	5.11119	3.20127e-07	4.48675e-06
wun	1739.41	0.587798	0.133041	4.41817	9.95403e-06	0.000101106
CG1358	15169.6	0.580442	0.088376	6.56787	5.10399e-11	1.41425e-09
pros	95313.6	0.578563	0.123245	4.69441	2.67377e-06	3.12353e-05
egl	1637.02	0.578054	0.119001	4.85756	1.18838e-06	1.4882e-05
betaTub60D	5136.39	0.576957	0.120834	4.77479	1.79896e-06	2.16474e-05
Rab2	6312.1	0.57667	0.107008	5.38905	7.08328e-08	1.15897e-06
Neb-cGP	4861.24	0.576667	0.125742	4.58612	4.51551e-06	5.02017e-05
Tpi	8363.83	0.576134	0.107541	5.35734	8.44552e-08	1.34979e-06
apt	40584	0.574891	0.0979529	5.86906	4.38282e-09	8.93345e-08
CG14441	13892.8	0.57448	0.107776	5.33029	9.80546e-08	1.55171e-06
levy	8453.27	0.573606	0.125812	4.55925	5.13374e-06	5.62533e-05
spdo	13651.2	0.57134	0.090202	6.334	2.38889e-10	6.01967e-09
ND-15	2785.13	0.567645	0.102225	5.55292	2.80934e-08	4.96146e-07
Vha13	5511.68	0.562392	0.139139	4.04194	5.30115e-05	0.000441935
drongo	6141.67	0.559688	0.0926602	6.04022	1.53907e-09	3.40905e-08
ND-ACP	5930.21	0.559476	0.0917778	6.09598	1.0877e-09	2.46204e-08
Hex-A	7056.42	0.559125	0.0989053	5.65313	1.57553e-08	2.94424e-07
koko	2147.38	0.558806	0.144337	3.87155	0.000108147	0.000815604
CG43737	12934.5	0.558735	0.135566	4.12149	3.76437e-05	0.000328593
CG44243	4555.53	0.557416	0.101723	5.47976	4.25894e-08	7.16295e-07
Best1	3490.48	0.5558	0.125011	4.44599	8.74861e-06	9.03856e-05
rin	46284	0.555724	0.0918395	6.05103	1.43921e-09	3.20258e-08
CG11077	1589.39	0.555627	0.134023	4.14575	3.38697e-05	0.000298638
CG9485	4231.25	0.554374	0.133463	4.15375	3.27069e-05	0.000290406
CG6543	1826.51	0.55245	0.117436	4.70427	2.54777e-06	2.99115e-05
ATPsynB	9929.65	0.552065	0.127142	4.34213	1.41108e-05	0.000138278
Ptp99A	17290.3	0.547971	0.104449	5.24632	1.55167e-07	2.34763e-06
ATPsynCF6	6256.88	0.545086	0.0959231	5.68253	1.32719e-08	2.51922e-07
Nrk	3222.21	0.545005	0.104943	5.19336	2.06529e-07	3.02283e-06
CG42389	16618.2	0.543658	0.102153	5.32198	1.02644e-07	1.6155e-06
Pkc98E	5160.27	0.541517	0.134275	4.0329	5.50919e-05	0.000456909
CG3618	4841.9	0.541514	0.103205	5.24698	1.54614e-07	2.34172e-06
CG18190	4766.6	0.541249	0.126004	4.29549	1.74308e-05	0.000165759
CG9281	21739.8	0.540633	0.0976065	5.5389	3.04379e-08	5.31067e-07
CkIalpha	8102.4	0.538708	0.109494	4.91998	8.65511e-07	1.11278e-05
nvy	4156.49	0.538172	0.0944981	5.69505	1.23333e-08	2.35652e-07
Sam-S	40072	0.536557	0.0880149	6.09621	1.08613e-09	2.46204e-08
G6P	1493.51	0.535173	0.130679	4.09533	4.21563e-05	0.000362299
Afti	4740.18	0.534614	0.0993331	5.38203	7.36502e-08	1.19694e-06
Pdp1	6656.97	0.534227	0.134751	3.96455	7.35357e-05	0.000587794
msi	70560	0.533528	0.0826562	6.45479	1.0837e-10	2.91894e-09
p130CAS	3717.33	0.532276	0.108331	4.9134	8.95085e-07	1.1447e-05
pyr	1956.53	0.529736	0.117534	4.50708	6.57256e-06	7.00041e-05
Rheb	2267.98	0.528974	0.107938	4.90073	9.54814e-07	1.2125e-05
RhoGAPp190	21378.4	0.527186	0.0954298	5.52433	3.30738e-08	5.68146e-07
CG44838	6181.56	0.526129	0.0901063	5.83899	5.25198e-09	1.058e-07
PRAS40	6964.22	0.525636	0.108687	4.83626	1.32305e-06	1.6356e-05
CG18324	1324.77	0.524881	0.131385	3.99499	6.46971e-05	0.00052493
TfIIA-S	3687.95	0.524706	0.105788	4.95999	7.04969e-07	9.23612e-06
CG14696	6629.92	0.523305	0.100849	5.18898	2.11454e-07	3.08003e-06
CysRS	3084.02	0.52317	0.13189	3.96673	7.28664e-05	0.000582931
GstZ2	18331.8	0.522979	0.114725	4.55855	5.15072e-06	5.63967e-05
Dys	18760	0.519547	0.0980358	5.29956	1.16079e-07	1.8034e-06
ade5	8774.27	0.518368	0.125145	4.14215	3.44066e-05	0.000302527
mRpL35	1430.5	0.516851	0.128242	4.03029	5.57083e-05	0.000461492
Paf-AHalpha	2137.66	0.511222	0.115262	4.43531	9.19395e-06	9.41794e-05
Cad74A	3072.17	0.510832	0.127812	3.99674	6.42208e-05	0.000521848
cer	1148.97	0.510704	0.133066	3.83798	0.000124048	0.000923435
14-3-3zeta	72105.8	0.508748	0.0858677	5.92479	3.12703e-09	6.54549e-08
RpS15Ab	4596.86	0.50806	0.116845	4.34813	1.37301e-05	0.000135097
CG13893	2571.55	0.507237	0.106471	4.76409	1.89709e-06	2.27336e-05
raw	3328.29	0.506075	0.104226	4.85555	1.2005e-06	1.49949e-05
Men-b	12656.9	0.505584	0.0912493	5.54069	3.01278e-08	5.2629e-07
Wnt5	4947.04	0.504936	0.0953077	5.29796	1.17107e-07	1.81353e-06
CG13921	2641.53	0.504519	0.118103	4.27184	1.93866e-05	0.000181729
CG7222	4854.26	0.504499	0.0918008	5.49558	3.89428e-08	6.61114e-07
CG4662	3530.26	0.503304	0.109295	4.60502	4.12432e-06	4.63874e-05
P5CDh1	14247	0.502908	0.0831326	6.04947	1.45325e-09	3.22885e-08
TBCB	3196.03	0.500682	0.102369	4.89096	1.00345e-06	1.26869e-05
kek1	5972.83	0.500551	0.0967667	5.17276	2.30657e-07	3.33288e-06
ATPsynD	8506.54	0.500142	0.126175	3.96386	7.3747e-05	0.000588674
pk	4812.43	0.498378	0.11808	4.22066	2.43583e-05	0.000222845
g	3920.08	0.496861	0.102092	4.86682	1.1341e-06	1.42765e-05
Eno	31630.4	0.496451	0.0941191	5.27472	1.32962e-07	2.03294e-06
SdhC	4702.99	0.496434	0.102531	4.8418	1.28669e-06	1.59501e-05
Tsp42Ee	22600.4	0.495746	0.0892949	5.55178	2.82769e-08	4.9817e-07
RabX1	1335.17	0.495117	0.12764	3.87902	0.00010488	0.000795064
smog	60857.4	0.493206	0.0858291	5.74638	9.1176e-09	1.76779e-07
CG2100	2022.26	0.489971	0.117433	4.17235	3.01477e-05	0.000269503
Pfk	12005.5	0.489011	0.118934	4.11163	3.92882e-05	0.000340686
Cyt-c1	9324.5	0.488274	0.10929	4.46771	7.90626e-06	8.2508e-05
Paip2	2737.95	0.486922	0.123247	3.95077	7.78991e-05	0.000614023
Mob4	6338.24	0.48421	0.10161	4.76536	1.88515e-06	2.26281e-05
Dl	12180.9	0.48377	0.105245	4.59662	4.29394e-06	4.80336e-05
Vha26	16191.8	0.482077	0.113065	4.26371	2.01057e-05	0.000187498
CG3408	6332.22	0.481375	0.119039	4.04386	5.25783e-05	0.000439337
CG3838	2777.84	0.478383	0.121169	3.94806	7.87886e-05	0.000619642
Ubc6	8080.53	0.477758	0.0940243	5.08121	3.75031e-07	5.18094e-06
Tsp97E	4335.39	0.477298	0.10348	4.61249	3.97883e-06	4.48557e-05
Mnt	5230.98	0.47599	0.110078	4.32412	1.53143e-05	0.000148066
Kdm2	5458.62	0.475201	0.0918378	5.17435	2.28706e-07	3.30801e-06
COX7C	6824.54	0.473016	0.113886	4.15342	3.27541e-05	0.000290469
rl	19449.1	0.472884	0.0860415	5.496	3.88505e-08	6.60322e-07
Atxn7	2739.4	0.470689	0.109358	4.30413	1.67645e-05	0.000160054
Faf2	5325.89	0.46824	0.108758	4.30533	1.66735e-05	0.000159501
Myo81F	2803.84	0.467417	0.107393	4.35239	1.3466e-05	0.000132678
phyl	4103.8	0.467022	0.0974097	4.79441	1.63152e-06	1.97641e-05
Rcd-1	9483.53	0.466397	0.0852085	5.4736	4.40996e-08	7.37406e-07
Rsf1	6358.25	0.46516	0.11907	3.9066	9.36033e-05	0.000721683
ND-24	3709.43	0.464198	0.117907	3.93698	8.2512e-05	0.000644762
CG16791	15383.8	0.462701	0.115415	4.00902	6.09722e-05	0.000499096
CG42307	3699.85	0.462334	0.107821	4.28798	1.80304e-05	0.000171123
pAbp	435457	0.461427	0.0896779	5.14538	2.66977e-07	3.80075e-06
Rab7	6734.7	0.461019	0.0870133	5.29826	1.16909e-07	1.81241e-06
Jupiter	4734.67	0.460971	0.112779	4.08738	4.36282e-05	0.000373616
Rab11	9716.4	0.460248	0.0888676	5.17903	2.23046e-07	3.23585e-06
exd	13904.6	0.458223	0.0913283	5.01732	5.23969e-07	7.03684e-06
Poxn	12654.6	0.456525	0.0866593	5.26805	1.37883e-07	2.09931e-06
uzip	14601	0.455452	0.0952912	4.77958	1.75663e-06	2.12263e-05
foxo	6237.46	0.454133	0.0940638	4.82793	1.37962e-06	1.69828e-05
CG11151	1830.19	0.452207	0.117352	3.85343	0.000116474	0.000872436
eff	19248.5	0.451784	0.0971526	4.65025	3.31532e-06	3.80886e-05
ATPsyndelta	7232.67	0.451639	0.110181	4.09908	4.14796e-05	0.000357119
Hip14	4280.6	0.451413	0.103905	4.34446	1.3962e-05	0.000137006
corto	19269.3	0.451116	0.0838742	5.37848	7.51156e-08	1.21626e-06
rut	7817.15	0.450702	0.117906	3.82254	0.000132083	0.000970266
SERCA	24718	0.450107	0.104152	4.32164	1.54875e-05	0.00014934
coil	1839.35	0.449323	0.115663	3.88476	0.000102432	0.000779367
mino	9966.5	0.449259	0.0826967	5.43262	5.55335e-08	9.19035e-07
ND-PDSW	4735.08	0.448642	0.101448	4.42237	9.76231e-06	9.93681e-05
CG43427	7469.74	0.447685	0.0983852	4.55032	5.35633e-06	5.82949e-05
Bsg	16666.2	0.447187	0.0910882	4.90938	9.13648e-07	1.16432e-05
mura	19554.7	0.446974	0.0794744	5.62413	1.86443e-08	3.42658e-07
CG14434	5929.29	0.446806	0.104637	4.27007	1.95408e-05	0.000182938
CG7120	2390.68	0.445319	0.106684	4.17421	2.99024e-05	0.000267807
Naa40	2036.4	0.445253	0.111874	3.97995	6.89304e-05	0.000554818
tapas	5657.88	0.443866	0.101074	4.3915	1.1257e-05	0.000112523
Snoo	21218.2	0.443111	0.0844389	5.24771	1.53999e-07	2.33572e-06
otk	15099.5	0.443008	0.105177	4.21201	2.53113e-05	0.000231272
CG17385	3906.86	0.442491	0.106899	4.13935	3.48287e-05	0.000305867
Nrt	22842.9	0.440192	0.0772209	5.70043	1.19504e-08	2.28638e-07
Csp	14519.5	0.4393	0.0914292	4.80481	1.54898e-06	1.88272e-05
CG32533	9005.2	0.437635	0.0980933	4.46141	8.14203e-06	8.4846e-05
CG18135	5274.19	0.436606	0.101637	4.29573	1.74119e-05	0.000165743
p38b	4647.92	0.436445	0.107977	4.04204	5.29884e-05	0.000441935
Gdi	10487.4	0.435605	0.0950944	4.58076	4.63287e-06	5.13879e-05
Sar1	7407.69	0.434694	0.087621	4.96108	7.01032e-07	9.2012e-06
not	3075.47	0.433433	0.099917	4.33793	1.43832e-05	0.000140504
tow	3487.76	0.43328	0.111311	3.89251	9.92137e-05	0.000760078
Ady43A	11042.4	0.431535	0.0892216	4.83666	1.32037e-06	1.63368e-05
Fer2LCH	21174.9	0.43012	0.103212	4.16737	3.08136e-05	0.000275116
fax	16366.1	0.428367	0.0956786	4.47715	7.56474e-06	7.94023e-05
vsg	15537.5	0.426067	0.0926426	4.59904	4.24449e-06	4.75909e-05
CG3822	4726.23	0.425838	0.103194	4.12658	3.68192e-05	0.000321979
Thd1	25493.7	0.424686	0.0847297	5.01224	5.38007e-07	7.19199e-06
whd	4591.19	0.423815	0.106724	3.97114	7.15286e-05	0.000573498
CG12608	2481.65	0.423538	0.105512	4.01412	5.96667e-05	0.000489796
Akt1	13914.3	0.422461	0.104274	4.05144	5.09042e-05	0.000427076
S	12089.8	0.422095	0.0826218	5.10877	3.24268e-07	4.54037e-06
vig2	32744	0.41992	0.0936225	4.48525	7.28288e-06	7.66105e-05
FK506-bp2	15775	0.41871	0.0912888	4.58666	4.504e-06	5.01122e-05
Cdc7	4856.61	0.415838	0.0976699	4.25758	2.06652e-05	0.000191849
Aldh	38664.2	0.415283	0.093465	4.44319	8.86353e-06	9.13771e-05
CG11360	33683.3	0.41494	0.091307	4.54445	5.50791e-06	5.98096e-05
Scsalpha	8758.21	0.414036	0.0994264	4.16425	3.12378e-05	0.000278216
CTPsyn	10213.6	0.413637	0.101867	4.06054	4.89587e-05	0.000413632
Mnn1	12518.5	0.413233	0.080153	5.15555	2.52892e-07	3.61446e-06
endos	7526.04	0.413171	0.0858653	4.81185	1.49536e-06	1.8236e-05
ras	14247.8	0.412413	0.0931587	4.427	9.55539e-06	9.74677e-05
eIF1	6681.98	0.411355	0.0962608	4.27334	1.92566e-05	0.000180862
CG17265	4933.55	0.41046	0.106628	3.84946	0.000118381	0.000885803
Pli	4438.67	0.406283	0.100621	4.03778	5.39604e-05	0.000449328
Ubr3	16384.2	0.406146	0.0858161	4.73275	2.21503e-06	2.62608e-05
CG2852	13783.4	0.405523	0.0896127	4.52529	6.03142e-06	6.50063e-05
Hsl	3094.79	0.405062	0.103176	3.92592	8.63996e-05	0.000671152
AGO1	70239.8	0.402551	0.101374	3.97095	7.15879e-05	0.000573655
roh	6335.02	0.402523	0.0939818	4.28299	1.84399e-05	0.000174323
Trx-2	7650.91	0.399367	0.0993409	4.02017	5.81561e-05	0.000478482
Nhe2	14192.9	0.399217	0.101627	3.92827	8.55591e-05	0.000665337
CCT7	13279.2	0.398209	0.0984112	4.04638	5.20167e-05	0.000435399
Tes	7156.38	0.396525	0.0914357	4.33665	1.44668e-05	0.000141085
CG11873	43682.1	0.392219	0.07975	4.9181	8.7389e-07	1.12156e-05
Mitofilin	9788.39	0.391941	0.0849623	4.61312	3.96679e-06	4.47897e-05
CG13551	7046.48	0.391855	0.0980311	3.99725	6.40833e-05	0.000521316
CG15236	3895.33	0.38762	0.100133	3.87106	0.000108362	0.000816324
CG4538	6406.17	0.385991	0.0937558	4.11698	3.83869e-05	0.00033347
CG31357	3180.84	0.3851	0.0993683	3.87548	0.000106413	0.000805541
Rbfox1	28695.4	0.384793	0.0887579	4.33531	1.45554e-05	0.00014158
Ror	5185.74	0.381633	0.0951326	4.0116	6.03096e-05	0.000494511
wal	4117.08	0.380905	0.0963606	3.95292	7.72047e-05	0.000610546
CG45050	30316.1	0.38089	0.0982376	3.87723	0.000105652	0.000800499
eIF4H1	20262.6	0.380682	0.0995321	3.82472	0.000130921	0.00096329
CG42324	4433.33	0.38037	0.0940449	4.04456	5.24225e-05	0.000438289
Asator	13910.8	0.370888	0.0825807	4.49122	7.08171e-06	7.4821e-05
shot	203714	0.366706	0.0948552	3.86596	0.000110653	0.000832722
Fer1HCH	25852.9	0.362646	0.0816992	4.4388	9.04615e-06	9.29287e-05
bel	23385	0.359604	0.0799272	4.49914	6.82277e-06	7.23494e-05
CG18766	4492.73	0.357168	0.0918354	3.88922	0.000100567	0.000768347
Arf79F	18629.7	0.354323	0.0924911	3.83088	0.000127685	0.000945972
skap	13409	0.35231	0.0894626	3.93806	8.21417e-05	0.000642215
cib	11864.2	0.34693	0.0860232	4.03298	5.50737e-05	0.000456909
l(3)neo38	20136.9	0.338331	0.0785064	4.3096	1.63553e-05	0.000156768
cic	13406.1	0.329469	0.0840551	3.91968	8.86658e-05	0.000686543
PRL-1	12696.3	0.327412	0.082624	3.96268	7.4113e-05	0.000590943
Adar	15016.4	0.326058	0.0853258	3.82133	0.000132735	0.000974558
eIF1A	26588.6	0.322408	0.0794886	4.05603	4.99143e-05	0.000420233
CG42709	35415.2	0.320203	0.0769774	4.15971	3.18657e-05	0.000283634
nonC	19114.3	-0.302478	0.0787204	-3.84243	0.000121823	0.000908271
RpL11	95085.5	-0.307063	0.0781731	-3.92799	8.5659e-05	0.000665756
Usp7	28636.9	-0.308739	0.0774389	-3.98687	6.69511e-05	0.000540995
Vps13B	18490.2	-0.313605	0.0779536	-4.02297	5.74694e-05	0.00047445
coro	9543.86	-0.319775	0.0826042	-3.87117	0.000108314	0.000816324
RpL7	134632	-0.320414	0.0740335	-4.32796	1.505e-05	0.000145705
CG30389	11545.4	-0.321666	0.0824242	-3.90257	9.5178e-05	0.000733043
mod(mdg4)	42312.8	-0.322094	0.0776605	-4.14746	3.3618e-05	0.000296856
kto	16661.5	-0.32276	0.0821074	-3.93095	8.46099e-05	0.000660085
rno	19553.2	-0.32344	0.08222	-3.93384	8.36008e-05	0.000652565
Taf1	14099.4	-0.326546	0.0842787	-3.8746	0.000106801	0.000807514
Dcr-1	9554.8	-0.3331	0.0841223	-3.95971	7.50405e-05	0.000597679
RpL26	76870.3	-0.333585	0.0826689	-4.0352	5.45567e-05	0.00045299
RpS3A	135665	-0.336857	0.0861367	-3.91073	9.20183e-05	0.000710599
RpL8	181972	-0.337743	0.0748006	-4.51524	6.32444e-06	6.7612e-05
fra	13708.4	-0.338557	0.0872428	-3.88063	0.000104185	0.000790624
RpL19	116358	-0.339018	0.0769045	-4.4083	1.04185e-05	0.000105184
eEF2	363671	-0.339105	0.0775156	-4.37467	1.21618e-05	0.000120899
RpL13	93832.8	-0.339888	0.0840066	-4.04597	5.21071e-05	0.000435903
pav	15876.5	-0.342352	0.07911	-4.32754	1.50781e-05	0.000145879
IntS3	14538	-0.345809	0.0865479	-3.99557	6.45383e-05	0.000524133
Stat92E	7316.85	-0.346006	0.0867264	-3.98962	6.61789e-05	0.000535653
spen	173766	-0.346751	0.0761733	-4.55213	5.31052e-06	5.79271e-05
Rack1	178810	-0.347159	0.0863259	-4.0215	5.78296e-05	0.000476608
FANCI	8297.06	-0.347318	0.0835467	-4.15717	3.22212e-05	0.000286446
MED14	10726.5	-0.351107	0.0828819	-4.23624	2.27297e-05	0.000209269
CG4849	8308.64	-0.351764	0.0911498	-3.85918	0.000113767	0.000853634
CG14967	9582.05	-0.353389	0.0858623	-4.11576	3.859e-05	0.000335034
Glg1	7875.03	-0.353745	0.0923484	-3.83054	0.000127861	0.000945972
l(1)G0007	12855.8	-0.355706	0.0899465	-3.95464	7.665e-05	0.000607155
mahj	13112.9	-0.356071	0.0852136	-4.17858	2.9334e-05	0.000263042
gry	6068.09	-0.356082	0.0930944	-3.82496	0.000130793	0.000963237
RpL28	85240.4	-0.356505	0.0893045	-3.99202	6.55127e-05	0.000530855
CG2918	15066.4	-0.358029	0.0795342	-4.50157	6.74541e-06	7.16341e-05
Set1	17603.5	-0.358143	0.0905491	-3.95523	7.64597e-05	0.000606577
Msp300	301509	-0.35957	0.0887361	-4.05213	5.07539e-05	0.000426062
mib1	6149.78	-0.360068	0.088693	-4.05971	4.91338e-05	0.000414386
Lrpprc2	7550.94	-0.360559	0.0870031	-4.14421	3.40992e-05	0.000300189
CG6454	7722.09	-0.362128	0.0847999	-4.27039	1.95134e-05	0.000182799
MED1	12532.9	-0.362417	0.0876935	-4.13277	3.58424e-05	0.000314387
Nup358	73533.6	-0.362722	0.0865632	-4.19025	2.78646e-05	0.000251896
MCPH1	5392.03	-0.363041	0.0902908	-4.02079	5.80033e-05	0.000477666
CG6695	14213.8	-0.364165	0.0906049	-4.01927	5.83796e-05	0.000480047
CG33303	8369.29	-0.365875	0.094041	-3.89059	0.000100001	0.000765295
Gyf	37991.4	-0.366435	0.0776619	-4.71835	2.3777e-06	2.80972e-05
Cand1	15815.7	-0.367204	0.0789698	-4.64993	3.3205e-06	3.81172e-05
mtRNApol	6657.56	-0.367208	0.0897294	-4.0924	4.26937e-05	0.000366481
baf	10210.1	-0.367654	0.0928298	-3.96052	7.47881e-05	0.000595997
Nup154	15892.4	-0.368407	0.0918773	-4.00977	6.07779e-05	0.000497787
Rpn2	13692.7	-0.370188	0.0970191	-3.81562	0.000135844	0.000996372
CG32164	16737.1	-0.370235	0.0788732	-4.69405	2.6785e-06	3.12434e-05
Asap	20519.8	-0.370903	0.0849801	-4.36458	1.27367e-05	0.00012644
JIL-1	9614.87	-0.371568	0.0836366	-4.44265	8.8856e-06	9.14742e-05
mud	34873.5	-0.372198	0.0825972	-4.50619	6.60035e-06	7.02483e-05
CG11399	8395.69	-0.373445	0.0947556	-3.94113	8.10972e-05	0.000635423
Pkn	17796.5	-0.374584	0.0873971	-4.286	1.81921e-05	0.000172545
SMC1	11773.2	-0.37751	0.0884963	-4.26583	1.99159e-05	0.000185848
ed	20694.7	-0.378428	0.0828805	-4.56595	4.97237e-06	5.46092e-05
Impbeta11	7146.74	-0.380119	0.0875096	-4.34375	1.40074e-05	0.000137358
Acf	21260	-0.382052	0.0837188	-4.56352	5.03025e-06	5.51611e-05
crq	4713.21	-0.38223	0.0993522	-3.84722	0.000119466	0.000892078
ttm50	3505.69	-0.384028	0.0980317	-3.91739	8.95133e-05	0.000692735
SA	7214.41	-0.384207	0.100335	-3.82925	0.000128533	0.000949976
RpI135	10968.7	-0.384221	0.0934505	-4.11149	3.93118e-05	0.000340687
eIF2Bdelta	5319.89	-0.384271	0.095785	-4.01181	6.02548e-05	0.000494342
H	9982.93	-0.384779	0.0831074	-4.62991	3.65827e-06	4.15658e-05
CG18273	14790.6	-0.385253	0.0954353	-4.0368	5.41855e-05	0.00045071
Graf	5274.98	-0.386186	0.0954239	-4.04706	5.18656e-05	0.000434386
CG10417	12834.3	-0.38751	0.0842551	-4.59925	4.24015e-06	4.75792e-05
RpS24	85287.7	-0.387743	0.0796623	-4.86734	1.13112e-06	1.42513e-05
kuz	16573	-0.388595	0.0842905	-4.61019	4.02301e-06	4.53184e-05
l(2)k09022	17640.4	-0.38864	0.0902861	-4.30454	1.67331e-05	0.00015986
CG9330	7357.54	-0.389554	0.0918239	-4.2424	2.21139e-05	0.000203859
Wbp2	6307.1	-0.389919	0.0931696	-4.18504	2.85112e-05	0.00025638
sigmar	3002.07	-0.390159	0.100062	-3.89916	9.65273e-05	0.000742247
loco	7815.41	-0.391386	0.084435	-4.63536	3.56324e-06	4.06457e-05
klar	67166.7	-0.391599	0.0909546	-4.30543	1.6666e-05	0.000159501
ksr	6522.6	-0.393389	0.0879812	-4.47129	7.77503e-06	8.14323e-05
l(3)72Ab	25235.8	-0.394002	0.0923082	-4.26834	1.96935e-05	0.00018401
CG1737	8275.42	-0.394429	0.096895	-4.07069	4.68748e-05	0.000397885
CG1354	16197.7	-0.395043	0.0862704	-4.57912	4.66932e-06	5.1631e-05
RpL7A	204314	-0.395814	0.0819424	-4.8304	1.36258e-06	1.6816e-05
Sf3b2	12022.5	-0.395877	0.10316	-3.83749	0.000124298	0.000924815
mib2	9376.78	-0.396077	0.0973738	-4.06759	4.75018e-05	0.000402499
CG8478	6319.87	-0.396272	0.0966716	-4.09916	4.1466e-05	0.000357119
MRP	14138.1	-0.397604	0.0835408	-4.75939	1.94174e-06	2.32303e-05
Cap-G	13171.7	-0.397991	0.0812749	-4.89686	9.73821e-07	1.23447e-05
Bruce	107649	-0.3984	0.0746673	-5.33567	9.51934e-08	1.50973e-06
sax	4981.25	-0.398759	0.0966265	-4.1268	3.67841e-05	0.000321866
Cip4	6344.8	-0.399011	0.0968255	-4.12093	3.77344e-05	0.000329186
CG16868	4714.28	-0.399229	0.0950996	-4.19801	2.69265e-05	0.000244947
CG16972	5194.39	-0.399318	0.0997796	-4.002	6.28095e-05	0.000512107
RpS29	174621	-0.399337	0.0967203	-4.12878	3.6469e-05	0.000319302
upSET	44286.2	-0.400999	0.0760218	-5.27479	1.32909e-07	2.03294e-06
RpL12	110323	-0.402557	0.08192	-4.91403	8.92244e-07	1.14207e-05
ssh	6917.11	-0.402572	0.0867666	-4.63971	3.48891e-06	3.98922e-05
NSD	15037.2	-0.403208	0.0908005	-4.44059	8.9712e-06	9.22242e-05
Axn	4731.02	-0.403694	0.0953087	-4.23564	2.27901e-05	0.000209558
Hsc70-5	17870.8	-0.40408	0.0819743	-4.92935	8.25035e-07	1.06738e-05
Catsup	5795.79	-0.404212	0.0895267	-4.51498	6.33218e-06	6.7612e-05
CG11050	7346.73	-0.404405	0.0884045	-4.57449	4.77386e-06	5.26289e-05
MFS17	10538.3	-0.404851	0.0879343	-4.60402	4.14408e-06	4.65734e-05
CG2685	3089.53	-0.404983	0.102633	-3.94592	7.94954e-05	0.000624224
CG8878	13256	-0.405117	0.0913008	-4.43717	9.11483e-06	9.35677e-05
Tdrd3	5226.34	-0.405997	0.0967332	-4.19708	2.70384e-05	0.000245501
CG32113	12679.2	-0.406369	0.0874101	-4.649	3.33552e-06	3.81987e-05
Xbp1	18116.4	-0.407824	0.0927207	-4.39842	1.09044e-05	0.000109605
CG18259	5197.33	-0.407852	0.106521	-3.82886	0.000128739	0.000951008
Mical	31997	-0.40816	0.0847817	-4.81425	1.47753e-06	1.80499e-05
Bap170	14742.4	-0.408783	0.0832044	-4.913	8.96947e-07	1.14606e-05
dx	2683.94	-0.409104	0.104967	-3.89747	9.72043e-05	0.000745869
CG8481	3032.41	-0.409226	0.100802	-4.05971	4.91338e-05	0.000414386
CG8531	8263.49	-0.409864	0.0989829	-4.14075	3.46169e-05	0.000304191
morgue	2853.02	-0.410192	0.102807	-3.98992	6.6095e-05	0.000535274
par-6	5988.2	-0.410306	0.101326	-4.04939	5.13517e-05	0.000430331
CG4360	8834.37	-0.410723	0.0894624	-4.59101	4.41108e-06	4.92298e-05
shu	2480.18	-0.412344	0.107549	-3.834	0.000126074	0.000936586
pre-mod(mdg4)-B	7228.3	-0.413086	0.104603	-3.94907	7.84542e-05	0.000617725
viaf	3543.87	-0.413228	0.104582	-3.95125	7.77429e-05	0.00061346
Girdin	6319.46	-0.413644	0.0902283	-4.58441	4.55261e-06	5.05364e-05
Mbs	12945.6	-0.414622	0.0890963	-4.65364	3.26121e-06	3.75558e-05
Vps8	3569.98	-0.41493	0.103589	-4.00553	6.18788e-05	0.000505087
Sbf	7989.41	-0.415041	0.0897294	-4.62548	3.73735e-06	4.22981e-05
emc	12804.7	-0.415114	0.095776	-4.33422	1.46281e-05	0.000142191
insc	10795.2	-0.415928	0.105229	-3.95261	7.73035e-05	0.000610993
Cog1	3935.71	-0.41626	0.0947876	-4.3915	1.12569e-05	0.000112523
Drice	3518.13	-0.418	0.104632	-3.99495	6.47089e-05	0.00052493
ebi	8131	-0.41853	0.084007	-4.98209	6.29003e-07	8.32378e-06
chm	3668.02	-0.418545	0.0964862	-4.33788	1.43865e-05	0.000140504
nesd	2775.53	-0.41931	0.106719	-3.92911	8.52599e-05	0.000663385
Mcm3	11279.8	-0.421737	0.0951434	-4.43264	9.30843e-06	9.51499e-05
vir	8395.6	-0.423103	0.0936278	-4.51899	6.2135e-06	6.67897e-05
CG8892	3715.63	-0.424407	0.103075	-4.11747	3.83056e-05	0.00033299
RpL35	98163.2	-0.424486	0.0839789	-5.05468	4.31113e-07	5.88426e-06
wde	13609.2	-0.426151	0.101738	-4.18869	2.80568e-05	0.000253317
Frl	14377.4	-0.426223	0.101398	-4.20345	2.6288e-05	0.000239289
Arp2	8941.94	-0.427204	0.0932823	-4.57969	4.65668e-06	5.15806e-05
Top3alpha	5815.86	-0.427601	0.0887353	-4.81884	1.44395e-06	1.76995e-05
kst	37606.8	-0.428443	0.0833827	-5.13827	2.77276e-07	3.93575e-06
eIF2Bgamma	4160.19	-0.428956	0.10028	-4.27759	1.88925e-05	0.000178369
RhoGAP54D	5957.26	-0.429165	0.0943206	-4.55007	5.36284e-06	5.83219e-05
omd	5142.5	-0.429418	0.110285	-3.89373	9.87159e-05	0.000756665
Cpsf73	6009.96	-0.429707	0.0927619	-4.63236	3.61512e-06	4.11725e-05
Golgin245	6660.1	-0.43015	0.101776	-4.22642	2.37433e-05	0.00021777
eIF4G2	28212.4	-0.430245	0.0845124	-5.09091	3.56346e-07	4.96549e-06
CG7239	4449.78	-0.431611	0.111265	-3.87913	0.000104831	0.000795064
ear	6947.31	-0.431638	0.0876343	-4.92544	8.41715e-07	1.08604e-05
Fs(2)Ket	75265.6	-0.432685	0.0906889	-4.77109	1.83231e-06	2.2012e-05
CG17754	2787.38	-0.434002	0.105062	-4.13089	3.61354e-05	0.000316765
Topors	4822.55	-0.434383	0.0928863	-4.6765	2.91806e-06	3.39283e-05
CG17002	3850.11	-0.435338	0.104311	-4.17348	2.99983e-05	0.000268334
CG32756	5497.88	-0.436257	0.0938291	-4.64948	3.32769e-06	3.81467e-05
Sec6	2430.2	-0.436319	0.105491	-4.13608	3.53284e-05	0.000310067
CG15812	3896.21	-0.436814	0.1023	-4.26992	1.95546e-05	0.000182948
trr	9796.26	-0.437686	0.087241	-5.01698	5.24912e-07	7.04298e-06
CG5180	3247.91	-0.437842	0.102014	-4.29197	1.77098e-05	0.000168301
RpL21	104109	-0.438179	0.0759845	-5.76669	8.08431e-09	1.57166e-07
psidin	4929.99	-0.438936	0.0904319	-4.85377	1.21137e-06	1.51045e-05
mip120	5080.5	-0.439863	0.0895745	-4.91058	9.08096e-07	1.15826e-05
CG8064	7050.77	-0.440006	0.100463	-4.37978	1.18801e-05	0.000118424
CG13625	2503.79	-0.441082	0.108828	-4.05301	5.05637e-05	0.000424958
Rca1	4046.21	-0.44207	0.108322	-4.08107	4.48285e-05	0.000382763
ADD1	12674.6	-0.44261	0.0912368	-4.85122	1.22702e-06	1.52734e-05
CG33969	3767.4	-0.442635	0.108593	-4.07608	4.58007e-05	0.000389225
CG6512	10995.8	-0.442701	0.0831622	-5.32335	1.01874e-07	1.60512e-06
eIF3h	44343.4	-0.442983	0.106847	-4.14595	3.38411e-05	0.000298638
CG9945	4175.83	-0.444015	0.114217	-3.88747	0.000101295	0.000772339
RpL17	96459.5	-0.444179	0.0738561	-6.01411	1.80881e-09	3.92243e-08
CG11414	8209.3	-0.444538	0.102254	-4.34738	1.37774e-05	0.00013547
mus308	10654.3	-0.444763	0.0820047	-5.42362	5.84024e-08	9.63206e-07
woc	22505.9	-0.444779	0.0798627	-5.5693	2.55762e-08	4.54464e-07
cert	3908.13	-0.445154	0.096183	-4.62819	3.6887e-06	4.18463e-05
MFS16	2506.1	-0.446652	0.109589	-4.07571	4.58749e-05	0.000389627
Spt5	11929.8	-0.446773	0.0840489	-5.31563	1.0629e-07	1.67107e-06
CG32441	2884.36	-0.44807	0.100566	-4.45546	8.37133e-06	8.68601e-05
Cp190	26934.1	-0.449271	0.0809608	-5.54924	2.86908e-08	5.04847e-07
CG42231	3468.22	-0.44939	0.101825	-4.41337	1.01775e-05	0.000103231
janA	3500.54	-0.451541	0.116577	-3.87332	0.000107361	0.000810895
pix	45347.6	-0.452095	0.101424	-4.45747	8.29335e-06	8.61745e-05
Fip1	6892.95	-0.452285	0.090662	-4.98869	6.07888e-07	8.0665e-06
CG14712	5356.93	-0.452413	0.092302	-4.90144	9.51352e-07	1.20917e-05
RpL15	99458.3	-0.454453	0.0956244	-4.75248	2.00933e-06	2.39793e-05
CG6420	5051.26	-0.454683	0.0909697	-4.99818	5.78738e-07	7.70089e-06
CG8635	4963.08	-0.455203	0.091893	-4.95362	7.2845e-07	9.53511e-06
SCAP	10400.8	-0.455622	0.0992553	-4.5904	4.42388e-06	4.93346e-05
Trc8	4496.77	-0.455762	0.0998367	-4.56508	4.9931e-06	5.47953e-05
IntS2	6383.26	-0.455818	0.0920835	-4.95005	7.4194e-07	9.68331e-06
CG3520	2531.69	-0.456121	0.113443	-4.02071	5.8024e-05	0.000477666
Vps53	2843.81	-0.456587	0.103903	-4.39434	1.1111e-05	0.000111449
CG18870	1686.28	-0.457306	0.119284	-3.83375	0.000126206	0.000937089
Ote	6982.73	-0.457954	0.0882238	-5.19082	2.0937e-07	3.05582e-06
rb	8214.84	-0.458414	0.085406	-5.36747	7.98478e-08	1.28589e-06
SerRS	13865	-0.458715	0.112283	-4.08535	4.40102e-05	0.000376404
Plp	31362	-0.459158	0.0815544	-5.63008	1.80124e-08	3.33161e-07
sta	297106	-0.459925	0.0819788	-5.61029	2.01987e-08	3.6749e-07
sinu	2226.91	-0.46078	0.112271	-4.10418	4.05744e-05	0.000350369
pcx	15250.5	-0.461323	0.103678	-4.44957	8.60426e-06	8.89578e-05
CG3651	10651.9	-0.461362	0.101522	-4.54446	5.50751e-06	5.98096e-05
lin	3712.89	-0.461432	0.0981582	-4.7009	2.59021e-06	3.0385e-05
rictor	11490.2	-0.461892	0.0838491	-5.50861	3.61669e-08	6.16884e-07
Vps50	3580.95	-0.462159	0.110221	-4.19302	2.75264e-05	0.000249462
CG6406	2364.43	-0.462306	0.108604	-4.25679	2.07381e-05	0.000192403
d4	6425.05	-0.463133	0.105129	-4.4054	1.0559e-05	0.000106355
Pcmt	2217.11	-0.464982	0.11937	-3.89529	9.80811e-05	0.000752198
CG8818	7315.64	-0.465133	0.108866	-4.27252	1.93272e-05	0.000181408
cmet	22912	-0.465221	0.0941623	-4.94063	7.78705e-07	1.00925e-05
dos	4486.61	-0.465652	0.0937376	-4.96761	6.77847e-07	8.91307e-06
jnj	7653.32	-0.465837	0.0877378	-5.30943	1.09969e-07	1.72142e-06
Inx3	10187.8	-0.466222	0.0901913	-5.16925	2.35029e-07	3.39268e-06
Caf1-180	6853.25	-0.466926	0.104909	-4.45076	8.55656e-06	8.8602e-05
Mrtf	9056.86	-0.467068	0.089747	-5.20427	1.94757e-07	2.88623e-06
CG32649	1931.07	-0.467588	0.12023	-3.88911	0.000100612	0.000768347
Clbn	7562.78	-0.467674	0.115994	-4.03187	5.53345e-05	0.000458658
wol	1948.87	-0.468144	0.117607	-3.98057	6.87514e-05	0.000553686
Smurf	10676	-0.468288	0.100594	-4.65523	3.23615e-06	3.73266e-05
Fit2	1579.27	-0.468591	0.12051	-3.8884	0.000100909	0.000770211
Nup93-2	8315.1	-0.469273	0.121313	-3.86829	0.000109603	0.000825244
Taf2	5932.03	-0.470214	0.0874383	-5.37767	7.54576e-08	1.21946e-06
CG11593	4132.43	-0.470514	0.104213	-4.51492	6.33395e-06	6.7612e-05
cdi	11007	-0.470609	0.0956355	-4.92086	8.61647e-07	1.1088e-05
RpL6	131649	-0.470686	0.0735824	-6.39671	1.58756e-10	4.12994e-09
CG1824	5499.29	-0.470686	0.0929718	-5.06268	4.134e-07	5.66317e-06
Reep1	15842.5	-0.470883	0.0913168	-5.15659	2.51491e-07	3.59799e-06
CG10916	2210.71	-0.472608	0.116671	-4.05076	5.10519e-05	0.000428067
Hsc70-3	31214.8	-0.472776	0.0854692	-5.53154	3.17436e-08	5.4921e-07
bon	19212.7	-0.472778	0.0853973	-5.53622	3.09071e-08	5.37954e-07
Gp93	23672.4	-0.472782	0.0871635	-5.42408	5.82524e-08	9.6183e-07
wdn	5754.75	-0.475061	0.108249	-4.3886	1.14085e-05	0.000113959
Apc2	5306.6	-0.475492	0.104929	-4.53155	5.85536e-06	6.32501e-05
CG9213	2211.76	-0.475523	0.121929	-3.90001	9.61873e-05	0.000740028
Nelf-A	7735.64	-0.476487	0.0850714	-5.60102	2.13092e-08	3.8672e-07
CG4887	9491.04	-0.476665	0.0850446	-5.60488	2.08395e-08	3.78672e-07
CG9855	4218.05	-0.476667	0.099838	-4.77441	1.80237e-06	2.16704e-05
Caf1-105	3207.57	-0.47736	0.109269	-4.36866	1.25011e-05	0.000124187
sl	4448.1	-0.478826	0.0958272	-4.99677	5.82988e-07	7.75031e-06
XRCC1	4027.34	-0.478871	0.0985997	-4.85672	1.19347e-06	1.49328e-05
msl-2	4678.6	-0.4796	0.0996739	-4.8117	1.49655e-06	1.8236e-05
Spp	3758.91	-0.480708	0.101469	-4.73749	2.16383e-06	2.57381e-05
CG11454	2261.67	-0.481759	0.113736	-4.23576	2.27784e-05	0.000209558
CG8243	5495.17	-0.481909	0.103056	-4.67617	2.9228e-06	3.39561e-05
pad	2574.83	-0.482208	0.108584	-4.44086	8.96012e-06	9.21758e-05
RtGEF	5427.83	-0.48221	0.0935902	-5.15235	2.57239e-07	3.67295e-06
Hydr1	4369.71	-0.482416	0.0928936	-5.19322	2.06691e-07	3.02283e-06
CenB1A	6111.7	-0.482518	0.110826	-4.35383	1.33779e-05	0.00013208
Iml1	12354.3	-0.482746	0.117827	-4.09707	4.18409e-05	0.000360016
Dtg	6901.8	-0.483131	0.120041	-4.02471	5.70448e-05	0.000471214
Vav	6072.73	-0.483302	0.103586	-4.66571	3.07555e-06	3.55921e-05
eIF3g1	15425.1	-0.483633	0.0933757	-5.17943	2.22567e-07	3.23214e-06
ssp	3683.89	-0.485564	0.105602	-4.59805	4.2646e-06	4.77793e-05
CG30020	12640.5	-0.485867	0.0816074	-5.95372	2.62122e-09	5.52179e-08
trc	3748	-0.486064	0.109552	-4.43682	9.12972e-06	9.36541e-05
Incenp	20353.1	-0.486702	0.0920226	-5.28894	1.23025e-07	1.89908e-06
pic	19543.6	-0.48785	0.092337	-5.28337	1.2683e-07	1.94981e-06
CG10376	3884.2	-0.487899	0.0944448	-5.16596	2.39203e-07	3.44604e-06
lili	5756.71	-0.488197	0.0910778	-5.36022	8.31202e-08	1.32992e-06
CG42260	8577.85	-0.490578	0.109076	-4.4976	6.87244e-06	7.27694e-05
CG7358	8069.51	-0.490758	0.0943939	-5.19904	2.00318e-07	2.94751e-06
CG43163	46244.1	-0.491685	0.0815154	-6.0318	1.6214e-09	3.55871e-08
mof	4659.97	-0.492345	0.0999832	-4.92428	8.46731e-07	1.09154e-05
CG5800	4210.22	-0.492849	0.0968891	-5.08674	3.64275e-07	5.0626e-06
SP2637	2386.55	-0.493267	0.124239	-3.9703	7.17825e-05	0.000574843
CG8202	5101.01	-0.49389	0.111144	-4.44369	8.84304e-06	9.12309e-05
gukh	37856.8	-0.494748	0.10435	-4.74125	2.12407e-06	2.5286e-05
Pcl	6893.26	-0.495005	0.102625	-4.82342	1.4112e-06	1.73273e-05
CG8507	3681.44	-0.495695	0.103193	-4.80356	1.55873e-06	1.89299e-05
CG7956	13199	-0.49579	0.104481	-4.74525	2.08251e-06	2.48117e-05
HBS1	4626.29	-0.496144	0.0987511	-5.02419	5.05569e-07	6.8087e-06
CG8950	2395.17	-0.49673	0.122268	-4.06265	4.85196e-05	0.000410402
Dlg5	9731.51	-0.497628	0.0832577	-5.97696	2.27335e-09	4.86417e-08
mus201	5627.21	-0.497639	0.116942	-4.25545	2.08627e-05	0.000193311
Wee1	6798.42	-0.497848	0.0902968	-5.51346	3.51846e-08	6.01549e-07
oys	7141.58	-0.498996	0.0970687	-5.14065	2.73789e-07	3.89389e-06
CG17068	3119.58	-0.499385	0.0998715	-5.00028	5.72474e-07	7.62455e-06
CG13671	2014.71	-0.4994	0.125568	-3.97711	6.97579e-05	0.000560543
Ankle2	17505.7	-0.500048	0.0935911	-5.3429	9.14719e-08	1.4539e-06
CG6425	1354.76	-0.500057	0.130631	-3.82801	0.000129182	0.000953307
gwl	5171.01	-0.500102	0.092871	-5.38491	7.24815e-08	1.18117e-06
D12	3655.87	-0.500509	0.112892	-4.43351	9.27126e-06	9.4837e-05
Pc	6803.73	-0.501584	0.131145	-3.82464	0.000130963	0.00096329
cnk	7460.65	-0.502479	0.0908177	-5.53283	3.15111e-08	5.46494e-07
RpL10Ab	143669	-0.503101	0.0981943	-5.12353	2.99872e-07	4.22332e-06
Sirt7	2930.78	-0.503754	0.121535	-4.14492	3.39939e-05	0.000299444
ncd	13386.1	-0.504062	0.0869369	-5.79803	6.70988e-09	1.32766e-07
neur	15076.9	-0.504794	0.0962569	-5.24424	1.5693e-07	2.36935e-06
dsh	4935.26	-0.504805	0.095188	-5.30324	1.13765e-07	1.77296e-06
RpS6	121588	-0.504843	0.0808295	-6.24578	4.21699e-10	1.00651e-08
Cdc23	3688.23	-0.505351	0.0959226	-5.26831	1.37682e-07	2.09846e-06
Atg13	5170.18	-0.505715	0.101748	-4.97025	6.68676e-07	8.81652e-06
Nup98-96	25812.8	-0.505893	0.079714	-6.34635	2.20486e-10	5.59493e-09
cmb	6306.21	-0.506043	0.0885399	-5.71542	1.09431e-08	2.1104e-07
armi	7174.68	-0.506835	0.0965746	-5.24812	1.53656e-07	2.33454e-06
ftz-f1	25777.8	-0.507014	0.110524	-4.58739	4.48828e-06	4.99758e-05
RpL38	80808.6	-0.507134	0.110504	-4.58927	4.44803e-06	4.95657e-05
CG9596	3499.63	-0.508288	0.0976796	-5.20363	1.95433e-07	2.89032e-06
ytr	9609.33	-0.509025	0.0912122	-5.58067	2.39592e-08	4.30492e-07
dia	9636.92	-0.509544	0.0940324	-5.41882	5.99953e-08	9.87651e-07
sti	34602.7	-0.510151	0.0881892	-5.78473	7.26281e-09	1.4273e-07
l(1)G0045	4893.31	-0.510191	0.0952688	-5.35528	8.54231e-08	1.36375e-06
Sirt1	10234	-0.511046	0.10152	-5.03395	4.80487e-07	6.50119e-06
Sf3a1	6298.95	-0.511399	0.0886252	-5.77035	7.91052e-09	1.5441e-07
Zwilch	3517.05	-0.511463	0.124216	-4.11752	3.82966e-05	0.00033299
pim	4678	-0.511943	0.0996143	-5.13925	2.75832e-07	3.91909e-06
dup	9850.59	-0.513082	0.125343	-4.09343	4.25039e-05	0.00036507
IKKbeta	2268.14	-0.51388	0.129677	-3.96275	7.40905e-05	0.000590943
feo	13019.9	-0.514727	0.0875836	-5.87697	4.17834e-09	8.53608e-08
sip2	15970	-0.514886	0.114422	-4.49987	6.79961e-06	7.21567e-05
ATP7	4562.47	-0.515475	0.106523	-4.83908	1.30439e-06	1.6153e-05
GCC185	4628	-0.516351	0.111241	-4.64175	3.45463e-06	3.95314e-05
barc	6828.94	-0.516376	0.0958983	-5.38462	7.2598e-08	1.18117e-06
CG10321	6405.05	-0.516962	0.0996037	-5.19018	2.10087e-07	3.06321e-06
AMPdeam	7503.02	-0.517388	0.110865	-4.66681	3.0591e-06	3.54542e-05
CG10638	5297.87	-0.517593	0.11252	-4.60001	4.22466e-06	4.74422e-05
CG12772	2762.12	-0.520665	0.102844	-5.06265	4.13461e-07	5.66317e-06
CG12702	5056.15	-0.52086	0.123546	-4.21592	2.48761e-05	0.000227438
Top3beta	9320.95	-0.521277	0.0846767	-6.15609	7.45631e-10	1.72963e-08
Ino80	12362.7	-0.521467	0.0889289	-5.86387	4.52206e-09	9.1993e-08
Klp67A	8796.49	-0.521633	0.086538	-6.02779	1.66214e-09	3.62725e-08
CG10555	15293.7	-0.523163	0.0804078	-6.50637	7.69902e-11	2.09321e-09
l(2)not	1665.49	-0.524292	0.124542	-4.20976	2.55642e-05	0.000233435
rempA	15219.6	-0.526979	0.13658	-3.8584	0.00011413	0.000855766
CG32537	2223.9	-0.528423	0.121384	-4.35331	1.34098e-05	0.000132305
RpS3	188604	-0.530188	0.0844062	-6.28138	3.35576e-10	8.17133e-09
CG7766	12872.8	-0.530493	0.0943862	-5.62045	1.90463e-08	3.49158e-07
CG2765	7913.84	-0.531074	0.0968158	-5.4854	4.12536e-08	6.96257e-07
Brca2	2667.97	-0.531752	0.105575	-5.03671	4.73598e-07	6.426e-06
CG3008	6819.38	-0.533174	0.127266	-4.18946	2.79619e-05	0.000252617
AGO3	3931.36	-0.533982	0.135882	-3.92976	8.50316e-05	0.000662303
Ku80	4375	-0.534212	0.115166	-4.63861	3.50756e-06	4.00421e-05
CG2658	6299.59	-0.536094	0.0936089	-5.72695	1.0225e-08	1.97455e-07
CG5721	4290.79	-0.537711	0.10813	-4.97282	6.5985e-07	8.70809e-06
CG7326	3813.11	-0.538949	0.110306	-4.88593	1.02941e-06	1.30038e-05
CG9356	1498.07	-0.539822	0.126656	-4.26212	2.02495e-05	0.000188596
CG8516	5108.79	-0.540139	0.0896124	-6.0275	1.66516e-09	3.62725e-08
mus101	5759.66	-0.540145	0.107684	-5.01601	5.27549e-07	7.06525e-06
enok	13852.2	-0.542149	0.0922205	-5.87884	4.13164e-09	8.45262e-08
CG6805	1071.73	-0.542702	0.136499	-3.97586	7.01259e-05	0.000562875
sowah	3931.09	-0.543091	0.111875	-4.85446	1.20718e-06	1.50653e-05
nbs	4168.93	-0.543093	0.109861	-4.94348	7.6742e-07	9.96405e-06
RpL37a	120384	-0.543675	0.0856525	-6.34745	2.18907e-10	5.56461e-09
RpL37a	120384	-0.543675	0.0856525	-6.34745	2.18907e-10	5.56461e-09
l(1)G0320	7741.82	-0.543903	0.09531	-5.70668	1.15204e-08	2.2129e-07
FLASH	2976.33	-0.544309	0.128658	-4.23067	2.32998e-05	0.000213973
ash1	12891.1	-0.54492	0.0822856	-6.6223	3.53643e-11	1.00493e-09
CG6230	6042.82	-0.545481	0.090049	-6.0576	1.38165e-09	3.08398e-08
CG8677	17715.5	-0.547086	0.091577	-5.97405	2.31428e-09	4.94443e-08
BRWD3	20547.3	-0.548297	0.0930476	-5.89265	3.80043e-09	7.80816e-08
MYPT-75D	4453.15	-0.549729	0.104831	-5.24395	1.57173e-07	2.37054e-06
eIF2Bepsilon	6933.91	-0.550048	0.0912554	-6.02756	1.66451e-09	3.62725e-08
CG6758	2684.24	-0.550548	0.108245	-5.08613	3.65441e-07	5.07269e-06
WRNexo	1701.99	-0.551409	0.13449	-4.10001	4.1313e-05	0.000356322
EloA	4101.42	-0.551567	0.122505	-4.5024	6.71912e-06	7.14073e-05
Ufl1	4778.84	-0.552018	0.098197	-5.62153	1.89273e-08	3.47417e-07
msl-1	10477.4	-0.552842	0.0860053	-6.428	1.29297e-10	3.43779e-09
Mms19	4135.03	-0.553216	0.106538	-5.19264	2.07332e-07	3.02914e-06
PEK	9051.64	-0.553379	0.0852574	-6.49069	8.54451e-11	2.31438e-09
Fic	1656.07	-0.553432	0.12006	-4.60963	4.03387e-06	4.54054e-05
CG10543	11441	-0.554029	0.0806862	-6.86646	6.5814e-12	2.06046e-10
CG2211	1713.03	-0.554252	0.116424	-4.76065	1.92969e-06	2.31051e-05
CG12877	3106.8	-0.557146	0.0995783	-5.59506	2.20547e-08	3.98749e-07
CG4880	1634.83	-0.557801	0.120864	-4.6151	3.92903e-06	4.43981e-05
Prp31	5479.84	-0.557986	0.119979	-4.6507	3.30817e-06	3.80664e-05
cher	13231.2	-0.559067	0.103013	-5.42713	5.72667e-08	9.46636e-07
CG7154	8543.14	-0.562835	0.0920574	-6.11396	9.71887e-10	2.21028e-08
loj	1748.26	-0.563722	0.130542	-4.31832	1.57219e-05	0.000151298
Ubqn	13351.3	-0.564613	0.089998	-6.27362	3.52757e-10	8.56087e-09
eIF3a	48531.8	-0.564828	0.0754433	-7.48679	7.05786e-14	2.96759e-12
CG17260	878.111	-0.565691	0.147832	-3.82658	0.000129938	0.000957909
U2af50	13145.4	-0.566022	0.0948863	-5.96526	2.4424e-09	5.20277e-08
gfzf	9001.92	-0.566511	0.095867	-5.90934	3.43473e-09	7.11748e-08
Pa1	4395.25	-0.567354	0.126551	-4.48321	7.35275e-06	7.72894e-05
Not10	2748.53	-0.56807	0.113388	-5.00996	5.44408e-07	7.27084e-06
sprt	1167.38	-0.568083	0.138573	-4.09952	4.14016e-05	0.000356873
CG10445	2183.54	-0.568166	0.129746	-4.37905	1.19196e-05	0.000118736
Hcf	31240.9	-0.568324	0.0823081	-6.90484	5.02605e-12	1.58381e-10
glu	20734.2	-0.56853	0.0893271	-6.36458	1.95819e-10	5.00411e-09
CG1234	7576.82	-0.570882	0.126967	-4.49629	6.91482e-06	7.31111e-05
MAN1	2777.4	-0.570959	0.112315	-5.08354	3.7047e-07	5.12283e-06
bic	77192.3	-0.571614	0.079996	-7.14553	8.96461e-13	3.15485e-11
Tasp1	2741.75	-0.571986	0.116432	-4.91262	8.9866e-07	1.14724e-05
Eaf6	928.711	-0.572823	0.144673	-3.95943	7.51285e-05	0.000598051
CG3655	6400.19	-0.573228	0.119015	-4.81644	1.46143e-06	1.78682e-05
CG12123	1013.83	-0.573792	0.147636	-3.88653	0.000101686	0.000774913
CG8833	2381.52	-0.574933	0.107867	-5.33002	9.8201e-08	1.55233e-06
Hel89B	15172.4	-0.575563	0.0849286	-6.77702	1.22683e-11	3.72009e-10
CG12007	1467.74	-0.576099	0.13076	-4.40578	1.05404e-05	0.000106316
Nsf2	3907.42	-0.579242	0.0962099	-6.0206	1.73767e-09	3.77383e-08
fng	1520.18	-0.580387	0.142595	-4.07017	4.69793e-05	0.000398539
EndoG	3497.29	-0.580685	0.106142	-5.47083	4.4793e-08	7.46412e-07
CG8010	4145.35	-0.582763	0.113952	-5.1141	3.15242e-07	4.43115e-06
Dok	4008.33	-0.583001	0.141423	-4.12239	3.74962e-05	0.000327503
Su(var)2-HP2	34341.9	-0.583124	0.090826	-6.42023	1.36066e-10	3.59435e-09
RasGAP1	17288.3	-0.584427	0.0968673	-6.03328	1.60665e-09	3.53708e-08
CG11906	1854.5	-0.5852	0.119373	-4.90228	9.47326e-07	1.20511e-05
Letm1	8636.17	-0.585491	0.0922328	-6.34796	2.18184e-10	5.55602e-09
CG42673	1270.62	-0.585615	0.148267	-3.94973	7.824e-05	0.000616375
eIF3f1	24881.1	-0.586735	0.0837205	-7.00826	2.41292e-12	7.94999e-11
Cap-D2	17947.8	-0.590393	0.0834337	-7.07619	1.48176e-12	5.03316e-11
CG18213	7818.16	-0.591149	0.141636	-4.17371	2.99675e-05	0.000268224
CG12179	5304.84	-0.592052	0.110711	-5.34772	8.90668e-08	1.41879e-06
Egfr	7355.59	-0.592178	0.11164	-5.30433	1.13086e-07	1.76448e-06
His2B:CG17949	7380.23	-0.592237	0.151198	-3.91696	8.96719e-05	0.00069359
RpL40	113745	-0.594099	0.0804935	-7.38071	1.57444e-13	6.18017e-12
mdlc	1669.71	-0.594523	0.120316	-4.94134	7.75865e-07	1.00647e-05
Orc1	4420.23	-0.595737	0.102784	-5.79602	6.79088e-09	1.33819e-07
cyc	2119.2	-0.596257	0.123499	-4.82804	1.37885e-06	1.69828e-05
CG12728	3999.07	-0.596993	0.110379	-5.40858	6.35275e-08	1.04298e-06
Slmap	11977.7	-0.597	0.089501	-6.67032	2.55254e-11	7.39878e-10
jigr1	53372.9	-0.598862	0.0896251	-6.68186	2.35932e-11	6.86624e-10
CG6511	3750.36	-0.599868	0.0980753	-6.1164	9.57147e-10	2.18362e-08
Sulf1	5054.26	-0.60107	0.095456	-6.29683	3.03801e-10	7.44776e-09
trbl	4323.71	-0.601176	0.119507	-5.03047	4.89279e-07	6.61396e-06
Chro	17175.1	-0.601473	0.0854434	-7.03944	1.93014e-12	6.47739e-11
corn	43833.6	-0.601617	0.113673	-5.29252	1.20642e-07	1.86428e-06
Mppe	1548.98	-0.602217	0.128799	-4.67562	2.93074e-06	3.4021e-05
Syx5	6004.01	-0.60334	0.145318	-4.15187	3.29774e-05	0.000291912
Cenp-C	11289.8	-0.606676	0.0815365	-7.44054	1.00273e-13	4.06259e-12
Wdr24	2345.24	-0.608776	0.110086	-5.52998	3.20259e-08	5.53431e-07
Taf6	4320.55	-0.609736	0.12909	-4.72335	2.31995e-06	2.74822e-05
CG18596	4939.29	-0.609901	0.142599	-4.27703	1.89401e-05	0.000178585
E(spl)mbeta-HLH	1006.16	-0.610414	0.143423	-4.25603	2.08086e-05	0.000192933
eIF4A	176985	-0.610508	0.0833147	-7.32774	2.34074e-13	8.8862e-12
Hlc	18001.1	-0.612779	0.111038	-5.51862	3.4168e-08	5.84858e-07
RpL5	176086	-0.613091	0.0761644	-8.04957	8.30841e-16	4.23144e-14
snama	7744.62	-0.616812	0.0888703	-6.94058	3.9049e-12	1.24681e-10
c11.1	11250.4	-0.617195	0.0830343	-7.43302	1.06148e-13	4.27666e-12
CG11710	2310.23	-0.617873	0.110907	-5.57107	2.5318e-08	4.51541e-07
ihog	2672.5	-0.618112	0.118623	-5.21071	1.88117e-07	2.80508e-06
Ncc69	10349	-0.61876	0.124705	-4.96179	6.9847e-07	9.17591e-06
CG6428	1257.35	-0.619435	0.143461	-4.31781	1.57588e-05	0.000151552
CG8097	2567.61	-0.621397	0.113427	-5.4784	4.29179e-08	7.20145e-07
PIG-A	835.024	-0.621449	0.151439	-4.10363	4.06715e-05	0.000350998
Tsp96F	5618.48	-0.622424	0.0917746	-6.7821	1.18439e-11	3.60653e-10
CG30183	7333.5	-0.623393	0.0899592	-6.92973	4.21641e-12	1.34036e-10
RhoGAP92B	4045.94	-0.626132	0.102088	-6.13324	8.61072e-10	1.97552e-08
RpL22	129076	-0.626775	0.0852224	-7.35459	1.91519e-13	7.38703e-12
eIF3e	34227.3	-0.626859	0.0925603	-6.77244	1.26626e-11	3.82364e-10
CG10217	2622.91	-0.627283	0.107658	-5.82662	5.65599e-09	1.13308e-07
CG33158	9387.32	-0.628367	0.0991856	-6.33526	2.36935e-10	5.98086e-09
ncm	13456.5	-0.628401	0.10198	-6.162	7.1832e-10	1.67577e-08
CG42724	12243.6	-0.633114	0.0817306	-7.74635	9.45697e-15	4.26123e-13
TyrRS	7501.53	-0.633971	0.112304	-5.64513	1.65055e-08	3.06071e-07
Ge-1	14785	-0.634825	0.0852061	-7.45047	9.30086e-14	3.8122e-12
spn-E	4671.57	-0.63517	0.139523	-4.55243	5.30309e-06	5.78897e-05
Mtl	6405.83	-0.635326	0.108472	-5.85704	4.71179e-09	9.53166e-08
spd-2	15297.6	-0.638222	0.0828229	-7.70587	1.29956e-14	5.73074e-13
Prp3	4959.32	-0.640143	0.112564	-5.68691	1.29357e-08	2.46187e-07
POSH	3182.15	-0.640848	0.104388	-6.13907	8.30038e-10	1.90869e-08
CG9932	3728.06	-0.641956	0.121475	-5.28469	1.25918e-07	1.93959e-06
Orct2	1673.53	-0.643185	0.130558	-4.92643	8.37458e-07	1.08152e-05
tap	19483.2	-0.643436	0.119983	-5.36272	8.19766e-08	1.31453e-06
Tsf2	3920.62	-0.64393	0.113521	-5.67235	1.40856e-08	2.65624e-07
CG6066	1578.21	-0.644881	0.162982	-3.95677	7.59714e-05	0.000604096
atl	7521.08	-0.645552	0.0912296	-7.07613	1.48235e-12	5.03316e-11
Tnpo-SR	3916.19	-0.645679	0.125686	-5.13722	2.78827e-07	3.95388e-06
CG31368	16314.3	-0.648252	0.084864	-7.63872	2.19384e-14	9.52905e-13
Nup58	2084.78	-0.648625	0.109832	-5.90562	3.51328e-09	7.25945e-08
RpL34b	53235.1	-0.649128	0.0856817	-7.57604	3.5627e-14	1.53366e-12
eys	8279.88	-0.652525	0.118713	-5.49665	3.87078e-08	6.5867e-07
Lpt	6352.65	-0.653487	0.0877113	-7.45043	9.30384e-14	3.8122e-12
rad50	27163.7	-0.654386	0.128584	-5.08917	3.59642e-07	5.0066e-06
CG15646	17882.8	-0.654754	0.119659	-5.47185	4.45365e-08	7.43852e-07
frtz	2419.81	-0.655894	0.105727	-6.20363	5.51767e-10	1.30832e-08
Cap-D3	3497.05	-0.656828	0.0991709	-6.62319	3.51539e-11	1.00092e-09
polo	25260.7	-0.657539	0.11138	-5.90354	3.55778e-09	7.32001e-08
MED16	2258.91	-0.657605	0.111032	-5.92267	3.16748e-09	6.62058e-08
cnn	13212.3	-0.658595	0.0830045	-7.93445	2.11434e-15	1.02969e-13
kibra	2811.82	-0.663936	0.116815	-5.68366	1.31846e-08	2.50593e-07
Lig4	2002.72	-0.666739	0.147203	-4.52939	5.9155e-06	6.3831e-05
Br140	10194.5	-0.668383	0.0910849	-7.33803	2.16767e-13	8.27261e-12
scra	26676.6	-0.669468	0.0763814	-8.7648	1.87102e-18	1.17153e-16
cana	10850.3	-0.670295	0.117505	-5.70439	1.16761e-08	2.23686e-07
CG11403	4977.15	-0.67041	0.0910103	-7.36631	1.75418e-13	6.80228e-12
Sec22	1966.37	-0.673461	0.119933	-5.61529	1.96231e-08	3.58369e-07
CG9967	1977.8	-0.674856	0.151145	-4.46495	8.00879e-06	8.35178e-05
neb	9793.92	-0.675157	0.0937033	-7.20527	5.7929e-13	2.08949e-11
RpII140	30380.6	-0.675465	0.109862	-6.14832	7.8306e-10	1.80929e-08
CG6923	4193.37	-0.676015	0.161289	-4.19133	2.77328e-05	0.000251176
Nab2	7453.46	-0.676083	0.0883201	-7.65492	1.93438e-14	8.45284e-13
Irbp18	1399.03	-0.677006	0.168049	-4.02862	5.61042e-05	0.000464506
CG14215	19183.9	-0.678603	0.0860959	-7.88195	3.22323e-15	1.53864e-13
Coprox	1422.92	-0.679982	0.124811	-5.44807	5.09183e-08	8.45559e-07
CG6686	17217.8	-0.68097	0.117791	-5.78118	7.41782e-09	1.45579e-07
Hsp67Ba	3026.64	-0.682192	0.155513	-4.38671	1.15078e-05	0.000114871
RhoGEF3	32732.2	-0.683213	0.0866899	-7.88112	3.24467e-15	1.54378e-13
baz	15651.2	-0.689642	0.105752	-6.5213	6.96998e-11	1.90935e-09
CG6191	33216.6	-0.699437	0.0981162	-7.12866	1.01354e-12	3.5325e-11
CG42676	1951.57	-0.700795	0.126952	-5.52016	3.38694e-08	5.80435e-07
RpS9	131421	-0.701457	0.0861821	-8.13924	3.97751e-16	2.09203e-14
Piezo	8806.98	-0.707766	0.115551	-6.12514	9.06014e-10	2.07351e-08
Ice1	6846.19	-0.708351	0.0921255	-7.68898	1.48317e-14	6.52053e-13
dah	2283.85	-0.709747	0.113533	-6.25144	4.0668e-10	9.75492e-09
mEFTs	4835.76	-0.712231	0.128802	-5.52966	3.20848e-08	5.53788e-07
phr6-4	960.849	-0.712388	0.147612	-4.82608	1.39247e-06	1.71264e-05
VepD	704.717	-0.714937	0.179302	-3.98734	6.68188e-05	0.000540227
CG13204	782.229	-0.714985	0.183765	-3.89076	9.99296e-05	0.000765157
wfs1	2631.57	-0.717946	0.114878	-6.24966	4.11345e-10	9.85048e-09
U4-U6-60K	5581.33	-0.718694	0.0885114	-8.11979	4.67009e-16	2.43856e-14
Cdc5	11345.7	-0.721837	0.0940138	-7.67799	1.61604e-14	7.08315e-13
CG6752	4718.92	-0.722937	0.0915438	-7.89717	2.853e-15	1.37096e-13
asp	19391.2	-0.723804	0.0784932	-9.22123	2.93723e-20	2.16756e-18
Fadd	677.053	-0.724505	0.16105	-4.49864	6.8388e-06	7.24662e-05
Atg1	14859.5	-0.726678	0.106381	-6.8309	8.43849e-12	2.608e-10
Sema1b	11555.1	-0.732671	0.0934294	-7.84197	4.43517e-15	2.07606e-13
Lsm12	12795	-0.733667	0.156815	-4.67855	2.88905e-06	3.3618e-05
Shark	2148.47	-0.734185	0.122784	-5.97947	2.23867e-09	4.79705e-08
LTV1	19307.1	-0.734888	0.126041	-5.83056	5.52427e-09	1.10976e-07
mus205	14382.7	-0.740033	0.0919113	-8.0516	8.17171e-16	4.19133e-14
CLIP-190	13878.4	-0.740806	0.0873038	-8.48538	2.15023e-17	1.23908e-15
eIF3b	57256.8	-0.742327	0.0759558	-9.77314	1.46823e-22	1.32728e-20
gd	6753.32	-0.742548	0.161583	-4.59546	4.31792e-06	4.82646e-05
Fit1	6739.79	-0.742619	0.0885473	-8.38669	5.00032e-17	2.82518e-15
CG1582	9669.29	-0.74501	0.0986052	-7.55548	4.17316e-14	1.79112e-12
RpL3	258312	-0.745388	0.0790573	-9.42845	4.16182e-21	3.27156e-19
CG13124	3090.57	-0.745663	0.166798	-4.47044	7.8057e-06	8.16944e-05
Ptth	1128.26	-0.755492	0.189858	-3.97925	6.91337e-05	0.000555855
HDAC6	4887.69	-0.757892	0.124711	-6.0772	1.22302e-09	2.75541e-08
CG14252	1051.23	-0.762964	0.175133	-4.3565	1.3216e-05	0.00013075
CG12592	8881.27	-0.763118	0.10117	-7.54293	4.5952e-14	1.96642e-12
teq	5376.44	-0.766393	0.137606	-5.56949	2.55488e-08	4.54464e-07
CG7466	12772.4	-0.766718	0.0880907	-8.70374	3.21133e-18	1.96816e-16
sle	49842.6	-0.773925	0.104251	-7.42367	1.13923e-13	4.57716e-12
Ing3	3397.31	-0.781735	0.0992653	-7.87521	3.40163e-15	1.61315e-13
Mcm2	13231.5	-0.782968	0.0833306	-9.39593	5.67172e-21	4.3636e-19
GLaz	711.435	-0.783696	0.16551	-4.73503	2.19022e-06	2.5988e-05
CG17186	1431.64	-0.783698	0.16176	-4.84482	1.26724e-06	1.57469e-05
CG8369	9670.13	-0.78394	0.146151	-5.36392	8.14365e-08	1.30732e-06
CG32706	458.326	-0.784701	0.199715	-3.92911	8.52622e-05	0.000663385
MME1	1054.76	-0.784827	0.155304	-5.0535	4.33788e-07	5.91358e-06
CG17684	5263.37	-0.785055	0.151952	-5.16648	2.3854e-07	3.43993e-06
RpL24-like	21085.9	-0.785253	0.115502	-6.7986	1.05637e-11	3.23031e-10
ana3	12528.5	-0.787418	0.0822991	-9.56776	1.09245e-21	9.18671e-20
l(2)41Ab	741.861	-0.788933	0.201	-3.92504	8.67159e-05	0.000672886
CG3788	1980.3	-0.789211	0.147541	-5.34909	8.83969e-08	1.40967e-06
CG30383	1075.81	-0.79246	0.164476	-4.81808	1.44947e-06	1.7737e-05
CG5004	18039.6	-0.796684	0.102498	-7.77268	7.68441e-15	3.4952e-13
Scm	9472.65	-0.802616	0.110525	-7.26185	3.81821e-13	1.40884e-11
sofe	2192.06	-0.804313	0.1101	-7.3053	2.76654e-13	1.0371e-11
CG10407	590.329	-0.807821	0.207677	-3.88979	0.000100331	0.000767364
eIF3m	39466.8	-0.812196	0.0980792	-8.28102	1.22121e-16	6.69074e-15
CG18011	3029.65	-0.813436	0.110601	-7.35471	1.91348e-13	7.38703e-12
CG7130	1060.19	-0.815437	0.180522	-4.5171	6.26908e-06	6.72172e-05
Fas3	1327.6	-0.817403	0.189276	-4.31857	1.57043e-05	0.000151229
eIF3c	72251.5	-0.817907	0.0919131	-8.8987	5.65027e-19	3.81957e-17
sca	5030.03	-0.835073	0.118116	-7.06996	1.54983e-12	5.23757e-11
CG31817	1312.22	-0.83648	0.132638	-6.30647	2.85472e-10	7.05823e-09
l(3)02640	5209.64	-0.836761	0.0976686	-8.56735	1.05894e-17	6.27725e-16
Dlish	918.325	-0.843884	0.174278	-4.84216	1.28434e-06	1.59457e-05
Spc105R	22019.7	-0.862022	0.0794439	-10.8507	1.97917e-27	2.86268e-25
CG17646	1639.03	-0.862783	0.142043	-6.07411	1.24679e-09	2.80459e-08
CG3308	5262.97	-0.864128	0.121851	-7.09165	1.32518e-12	4.55282e-11
stc	19711.1	-0.864679	0.126067	-6.85887	6.94085e-12	2.16363e-10
CG13698	1447.08	-0.880826	0.188522	-4.67227	2.97886e-06	3.45519e-05
CG16789	1381.45	-0.888161	0.208523	-4.2593	2.05071e-05	0.000190627
CG6040	1332.2	-0.894674	0.141383	-6.32803	2.48306e-10	6.22444e-09
obe	11120	-0.895337	0.088074	-10.1657	2.81982e-24	3.11343e-22
scb	2157.56	-0.898915	0.204596	-4.39362	1.1148e-05	0.000111743
Mocs1	1892.41	-0.90463	0.178811	-5.05913	4.21163e-07	5.75775e-06
CG42588	8761.72	-0.906059	0.13434	-6.74452	1.53537e-11	4.59785e-10
ft	7802.2	-0.907003	0.126306	-7.18098	6.92152e-13	2.45977e-11
zld	49180.9	-0.920621	0.0961126	-9.57857	9.83972e-22	8.32291e-20
Klp3A	14139.3	-0.927469	0.081273	-11.4118	3.65243e-30	6.44253e-28
CG31918	3261.16	-0.927652	0.138167	-6.71401	1.89346e-11	5.55517e-10
eIF3k	15495.9	-0.93012	0.0964654	-9.64201	5.3137e-22	4.60224e-20
CG18528	829.007	-0.931625	0.155182	-6.00345	1.93167e-09	4.17633e-08
rgr	3029.04	-0.932775	0.129232	-7.21785	5.28144e-13	1.9242e-11
eIF3l	42740.8	-0.943949	0.10387	-9.08779	1.01077e-19	7.2735e-18
nAChRalpha4	9649.25	-0.944944	0.09004	-10.4947	9.13533e-26	1.11977e-23
pes	1031.51	-0.95973	0.152886	-6.27744	3.44197e-10	8.36717e-09
mira	71741.1	-0.976664	0.0812381	-12.0223	2.71467e-33	5.69058e-31
Tsp42Ea	1627.22	-0.978247	0.189651	-5.15815	2.49405e-07	3.57521e-06
stau	73629.1	-0.981803	0.0778471	-12.6119	1.81482e-36	4.60518e-34
CG11961	5830.33	-0.98242	0.0959494	-10.2389	1.32683e-24	1.51113e-22
Sec24CD	9599.19	-0.989272	0.0825697	-11.9811	4.46604e-33	9.09813e-31
stg	4318.77	-0.991336	0.134878	-7.3499	1.98362e-13	7.63059e-12
Myo31DF	5701.33	-0.991569	0.137535	-7.20955	5.61369e-13	2.035e-11
RhoGAP18B	2167.12	-1.00054	0.214657	-4.66111	3.14513e-06	3.63058e-05
Trf	1211.97	-1.00587	0.13514	-7.44312	9.83323e-14	4.00642e-12
Kr-h1	11474.9	-1.01002	0.126242	-8.00066	1.23749e-15	6.17211e-14
CG5522	8034.39	-1.01375	0.0850558	-11.9186	9.46709e-33	1.85043e-30
CG9990	9362.37	-1.01704	0.134875	-7.54061	4.67783e-14	1.99588e-12
CG11882	1061.05	-1.04203	0.14656	-7.10988	1.16142e-12	4.00925e-11
CG31710	382.32	-1.06207	0.23819	-4.45892	8.23725e-06	8.57148e-05
CG42553	1299.04	-1.06502	0.161327	-6.60161	4.0673e-11	1.14232e-09
CG9650	512.738	-1.084	0.282808	-3.83299	0.000126597	0.000939506
rho	5591.25	-1.08636	0.108268	-10.034	1.08036e-23	1.12105e-21
hng3	1413.03	-1.0925	0.128574	-8.49701	1.94532e-17	1.13456e-15
Ip259	27119.4	-1.09774	0.102849	-10.6733	1.35693e-26	1.77438e-24
CG34195	366.079	-1.11327	0.22993	-4.84177	1.2869e-06	1.59501e-05
cactin	2868.15	-1.11455	0.101313	-11.0011	3.77518e-28	5.74782e-26
Corp	2180.12	-1.11592	0.198853	-5.61177	2.00263e-08	3.65272e-07
CG45782	413.592	-1.13087	0.278916	-4.05452	5.02377e-05	0.000422709
Su(var)3-3	7371.02	-1.13438	0.229275	-4.94768	7.51041e-07	9.78654e-06
CG8547	1904.47	-1.16297	0.164352	-7.07613	1.48239e-12	5.03316e-11
CG4364	43815.3	-1.16665	0.130925	-8.91079	5.06702e-19	3.45705e-17
CG33978	2449.21	-1.18984	0.169296	-7.02815	2.09294e-12	6.97519e-11
yellow-d	1532.7	-1.23136	0.237494	-5.18478	2.16265e-07	3.14378e-06
Cpr66D	565.442	-1.23772	0.236173	-5.24074	1.59931e-07	2.40963e-06
Hsp26	11737.3	-1.24775	0.191863	-6.50334	7.85584e-11	2.13184e-09
E(spl)m7-HLH	387.384	-1.24878	0.292098	-4.27521	1.90955e-05	0.000179933
mIF3	1395.82	-1.27301	0.128272	-9.92425	3.2655e-23	3.21308e-21
ec	3157.12	-1.27834	0.10301	-12.4098	2.31118e-35	5.66591e-33
Arc1	69866.2	-1.27861	0.176894	-7.22815	4.89626e-13	1.79745e-11
DnaJ-1	12173.2	-1.27907	0.149735	-8.54227	1.31608e-17	7.76973e-16
RpL27A	104988	-1.28527	0.101399	-12.6754	8.0935e-37	2.12844e-34
CG43759	5005.71	-1.29928	0.114673	-11.3302	9.29652e-30	1.54557e-27
CG2064	2015.11	-1.30553	0.12444	-10.4912	9.4811e-26	1.15239e-23
laccase2	1529.91	-1.32408	0.148076	-8.94195	3.82367e-19	2.6462e-17
Ect4	11581.6	-1.34956	0.138912	-9.71519	2.5976e-22	2.33365e-20
CG9336	1520.5	-1.35862	0.207678	-6.54197	6.07126e-11	1.66948e-09
sas	364.559	-1.40763	0.325691	-4.32198	1.54638e-05	0.000149274
GstD9	3245.21	-1.4102	0.262627	-5.3696	7.89093e-08	1.2724e-06
Hsp70Bc	4796.85	-1.42441	0.14091	-10.1087	5.05752e-24	5.4591e-22
Pvf2	1022.2	-1.42921	0.331251	-4.31459	1.59903e-05	0.000153574
Elal	852.458	-1.43235	0.197302	-7.25969	3.87964e-13	1.42787e-11
CG9993	782.136	-1.47164	0.259484	-5.67143	1.41612e-08	2.66702e-07
CG8526	1014.48	-1.50296	0.181616	-8.27546	1.27959e-16	6.98413e-15
edl	2190.46	-1.51151	0.145161	-10.4127	2.17083e-25	2.61657e-23
Kr	392.148	-1.54626	0.244338	-6.32838	2.47752e-10	6.22132e-09
kek5	10570.2	-1.56107	0.0945984	-16.5021	3.54506e-61	2.13649e-58
fest	1511.91	-1.58814	0.14572	-10.8986	1.17073e-27	1.71045e-25
dgo	405.45	-1.61105	0.250373	-6.43459	1.23811e-10	3.29798e-09
Jabba	458.982	-1.62429	0.263856	-6.15597	7.46188e-10	1.72963e-08
d	1041.05	-1.63944	0.164935	-9.93992	2.79054e-23	2.78361e-21
d	1041.05	-1.63944	0.164935	-9.93992	2.79054e-23	2.78361e-21
CG31139	206.066	-1.65238	0.279256	-5.91708	3.27712e-09	6.82019e-08
Arc2	434.575	-1.65249	0.31868	-5.18543	2.15523e-07	3.13614e-06
CG34423	285.896	-1.66199	0.268096	-6.19924	5.67366e-10	1.34311e-08
CG41520	1079.14	-1.69809	0.227167	-7.47507	7.71654e-14	3.23513e-12
E(spl)mdelta-HLH	115.914	-1.7168	0.426528	-4.02505	5.69629e-05	0.000470807
Tmhs	1132.48	-1.71798	0.283793	-6.05365	1.41599e-09	3.15576e-08
CG43999	201.377	-1.72162	0.377713	-4.558	5.16423e-06	5.64591e-05
vir-1	19685.3	-1.72707	0.155644	-11.0963	1.3077e-28	2.05594e-26
Rph	2006.3	-1.73089	0.298013	-5.80811	6.3181e-09	1.25702e-07
CG43088	243.239	-1.81179	0.261518	-6.92795	4.26982e-12	1.35436e-10
E(spl)malpha-BFM	147.267	-1.83455	0.330786	-5.54603	2.9223e-08	5.13586e-07
CG11756	107.994	-1.98144	0.379073	-5.22707	1.72216e-07	2.57861e-06
kni	867.436	-1.98919	0.194363	-10.2344	1.3908e-24	1.5716e-22
CG4213	1888.65	-2.0707	0.172812	-11.9823	4.3974e-33	9.08629e-31
Gbs-70E	830.87	-2.07322	0.181925	-11.396	4.37822e-30	7.6297e-28
Syp	116614	-2.11494	0.115705	-18.2787	1.22292e-74	1.47402e-71
lft	1301.53	-2.11884	0.222943	-9.50394	2.02086e-21	1.6514e-19
CG15556	2117.76	-2.16894	0.206399	-10.5085	7.89346e-26	9.84233e-24
Rh2	133.546	-2.17152	0.352571	-6.15909	7.31627e-10	1.70407e-08
CG44085	5531.88	-2.36593	0.115641	-20.4593	4.96797e-93	8.98209e-90
Tsf1	59008.6	-2.40574	0.19538	-12.3132	7.69505e-35	1.82461e-32
LanB1	5897.23	-2.41298	0.156534	-15.4151	1.29573e-53	6.04563e-51
CG6836	249.965	-2.42316	0.472653	-5.12673	2.94824e-07	4.15626e-06
Ir40a	535.528	-2.49737	0.319772	-7.80985	5.72577e-15	2.6375e-13
CG17999	256.079	-2.58685	0.333961	-7.74595	9.48664e-15	4.26133e-13
Strica	1420.97	-2.64266	0.176728	-14.9533	1.48223e-50	6.2492e-48
Hsp70Aa	2590.16	-2.6447	0.268182	-9.86158	6.10806e-23	5.8123e-21
Eip93F	14033.8	-2.66719	0.0823577	-32.3854	4.40425e-230	6.3703e-226
Hsp70Ba	6356.08	-2.68889	0.445956	-6.02951	1.64458e-09	3.59868e-08
CG31279	52.3809	-2.87676	0.602104	-4.77785	1.77182e-06	2.13386e-05
CG8620	751.818	-3.11542	0.17147	-18.1689	9.09283e-74	9.3942e-71
Hsp70Ab	17203.3	-3.12379	0.66342	-4.70862	2.49401e-06	2.93757e-05
CG42299	135.931	-3.13902	0.437842	-7.1693	7.53818e-13	2.65932e-11
CG40160	1492.84	-3.62416	0.143197	-25.3089	2.55097e-141	1.22991e-137
CG17672	62.9624	-3.85373	0.589109	-6.54163	6.08517e-11	1.67013e-09
CG42300	30.31	-3.93959	0.881004	-4.47171	7.75967e-06	8.13304e-05
