# Supplementary figures and images for: Coopted temporal patterning governs cellular hierarchy, heterogeneity and metabolism in Drosophila neuroblast tumors
Source: eLife journal article supplement (doi:10.7554/elife.50375), 2019-09-30

Temporally-regulated genes in various NBs throughout larval development

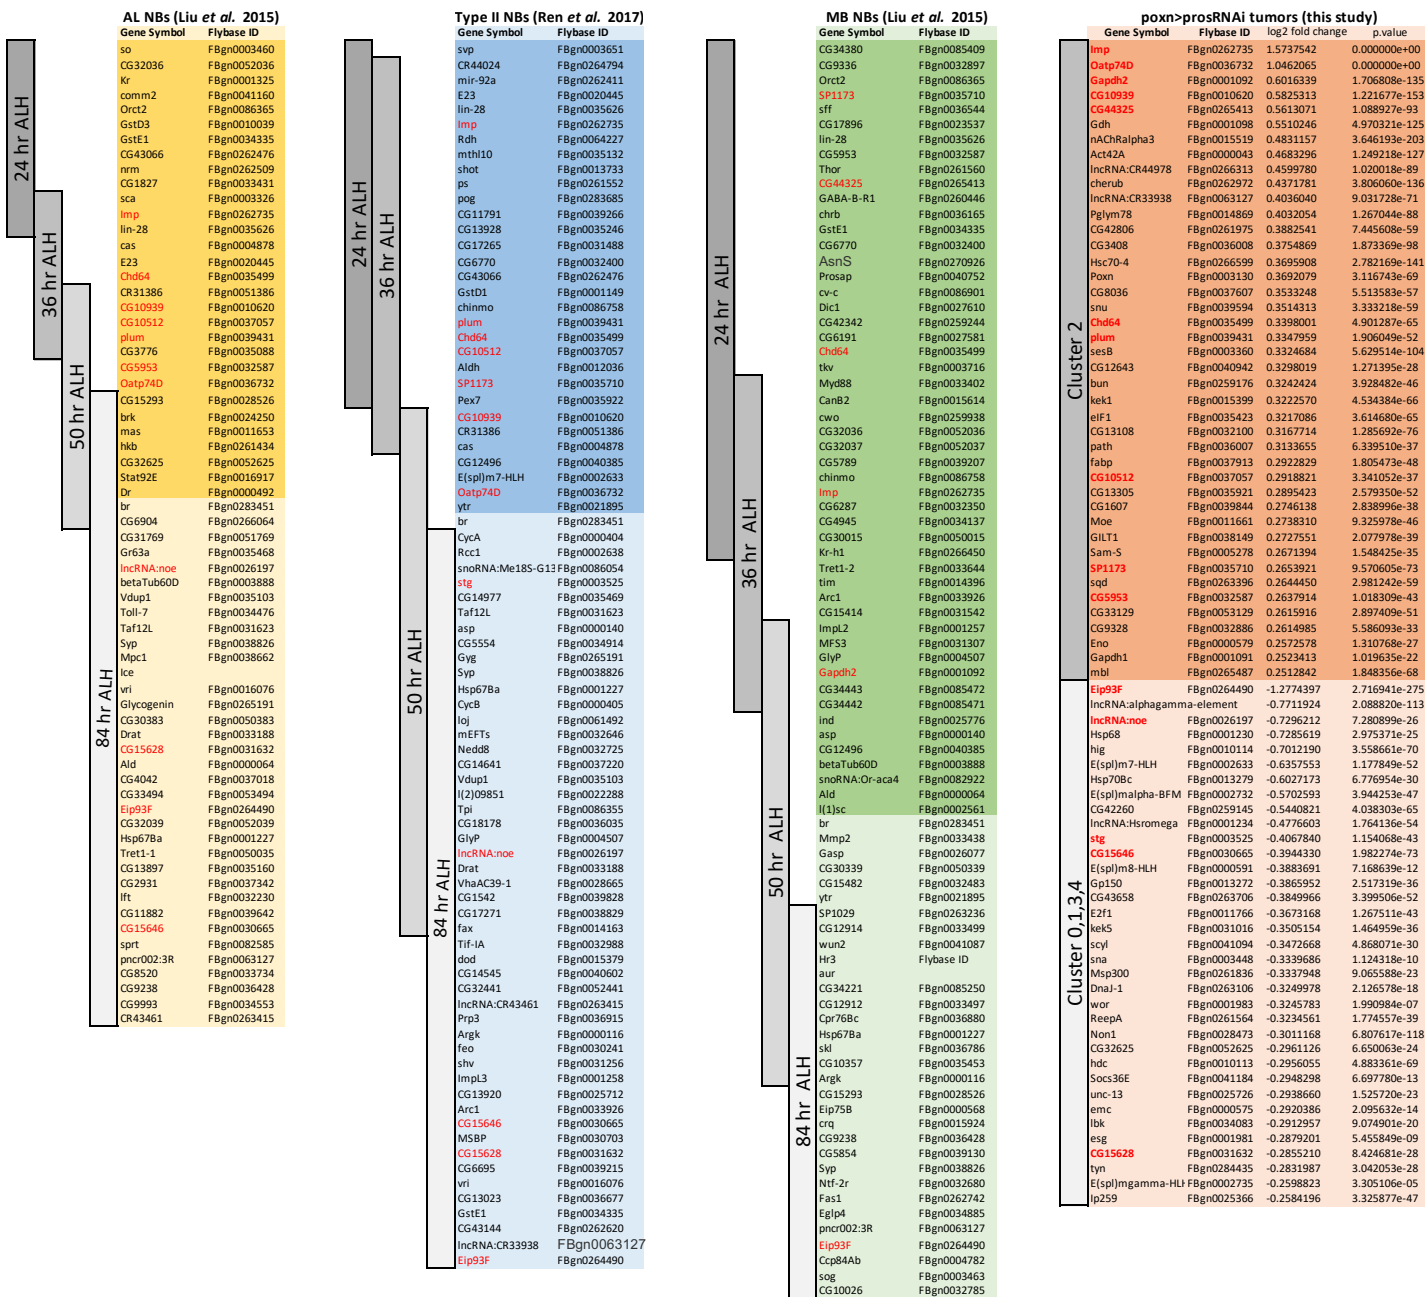

Supplement: supp [file elife_poa_e50375_Figure_1_figure_supplement_3.pdf › elife_poa_e50375_Figure_1_figure_supplement_3.pdf]

Figure S6

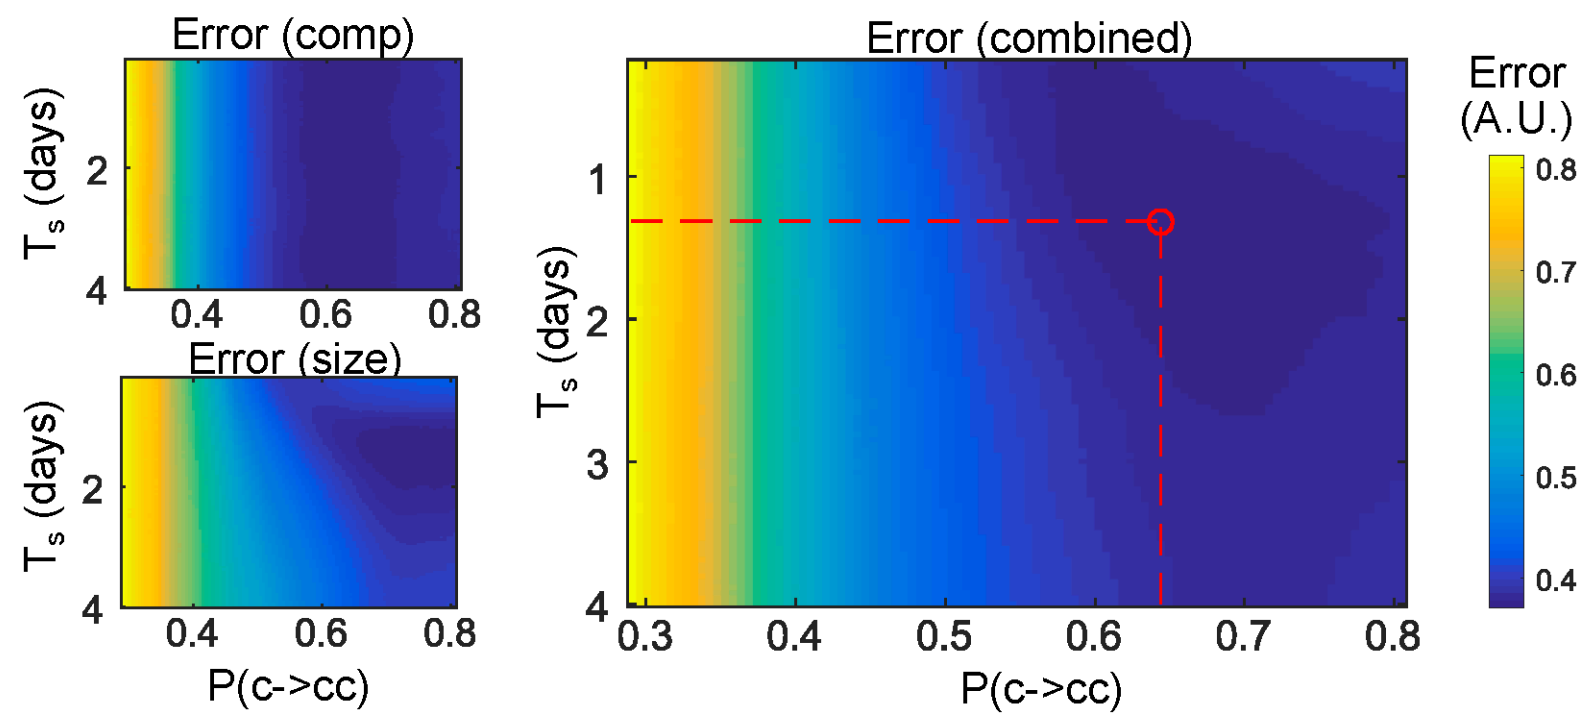

Supplement: supp [file elife_poa_e50375_Figure_4_figure_supplement_2.pdf › elife_poa_e50375_Figure_4_figure_supplement_2.pdf]
